# Supplementary material for: Synthesis of protected α-amino acids via decarboxylation amination from malonate derivatives
Source: Royal Society of Chemistry journal article supplement (doi:10.1039/d0ob00677g), 2020-01-01

**Synthesis of the protected  $\alpha$ - amino acid via decarboxylation  
amination from malonate derivatives**

**Hui Fu, Peihe Li, Zheng Wang, Xiaoying Li, Qipu Dai,\* Changwen Hu**

*Key Laboratory of Cluster Science of Ministry of Education, Beijing Key Laboratory  
of Photoelectronic/Electrophotonic, School of Chemistry, Beijing Institute of  
Technology, Beijing 100081, People's Republic of China*

E-mail: [daiqipu@bit.edu.cn](mailto:daiqipu@bit.edu.cn)

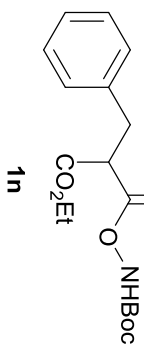

Table 1

|       |
|-------|
| 7.870 |
| 7.297 |
| 7.279 |
| 7.260 |
| 7.222 |
| 7.204 |
| 4.188 |
| 4.171 |
| 4.153 |
| 4.136 |
| 3.823 |
| 3.804 |
| 3.785 |
| 3.291 |
| 3.272 |
| 1.465 |
| 1.212 |
| 1.194 |
| 1.177 |

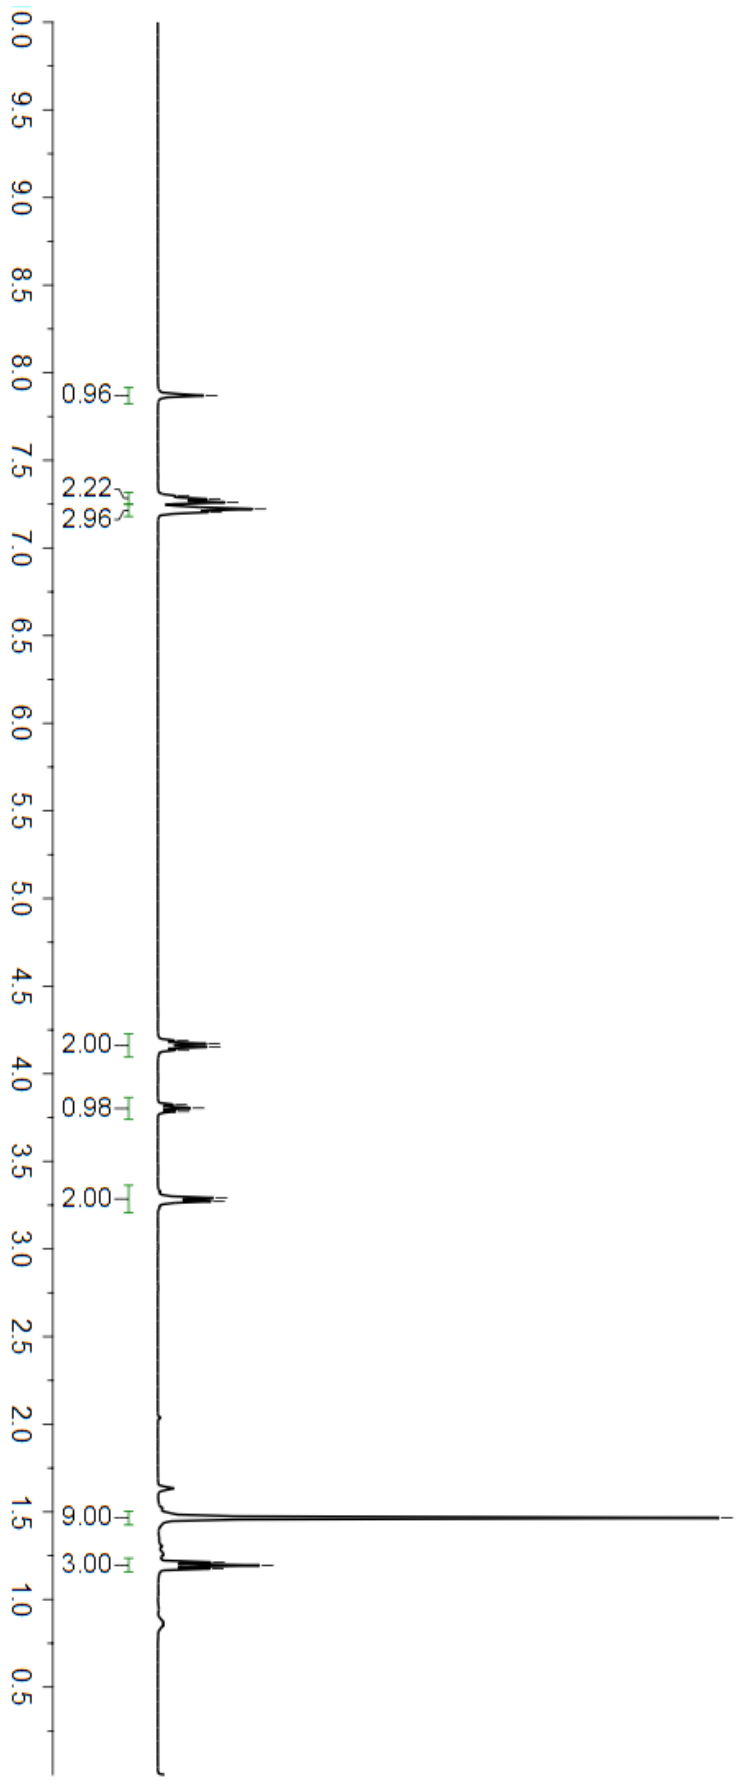

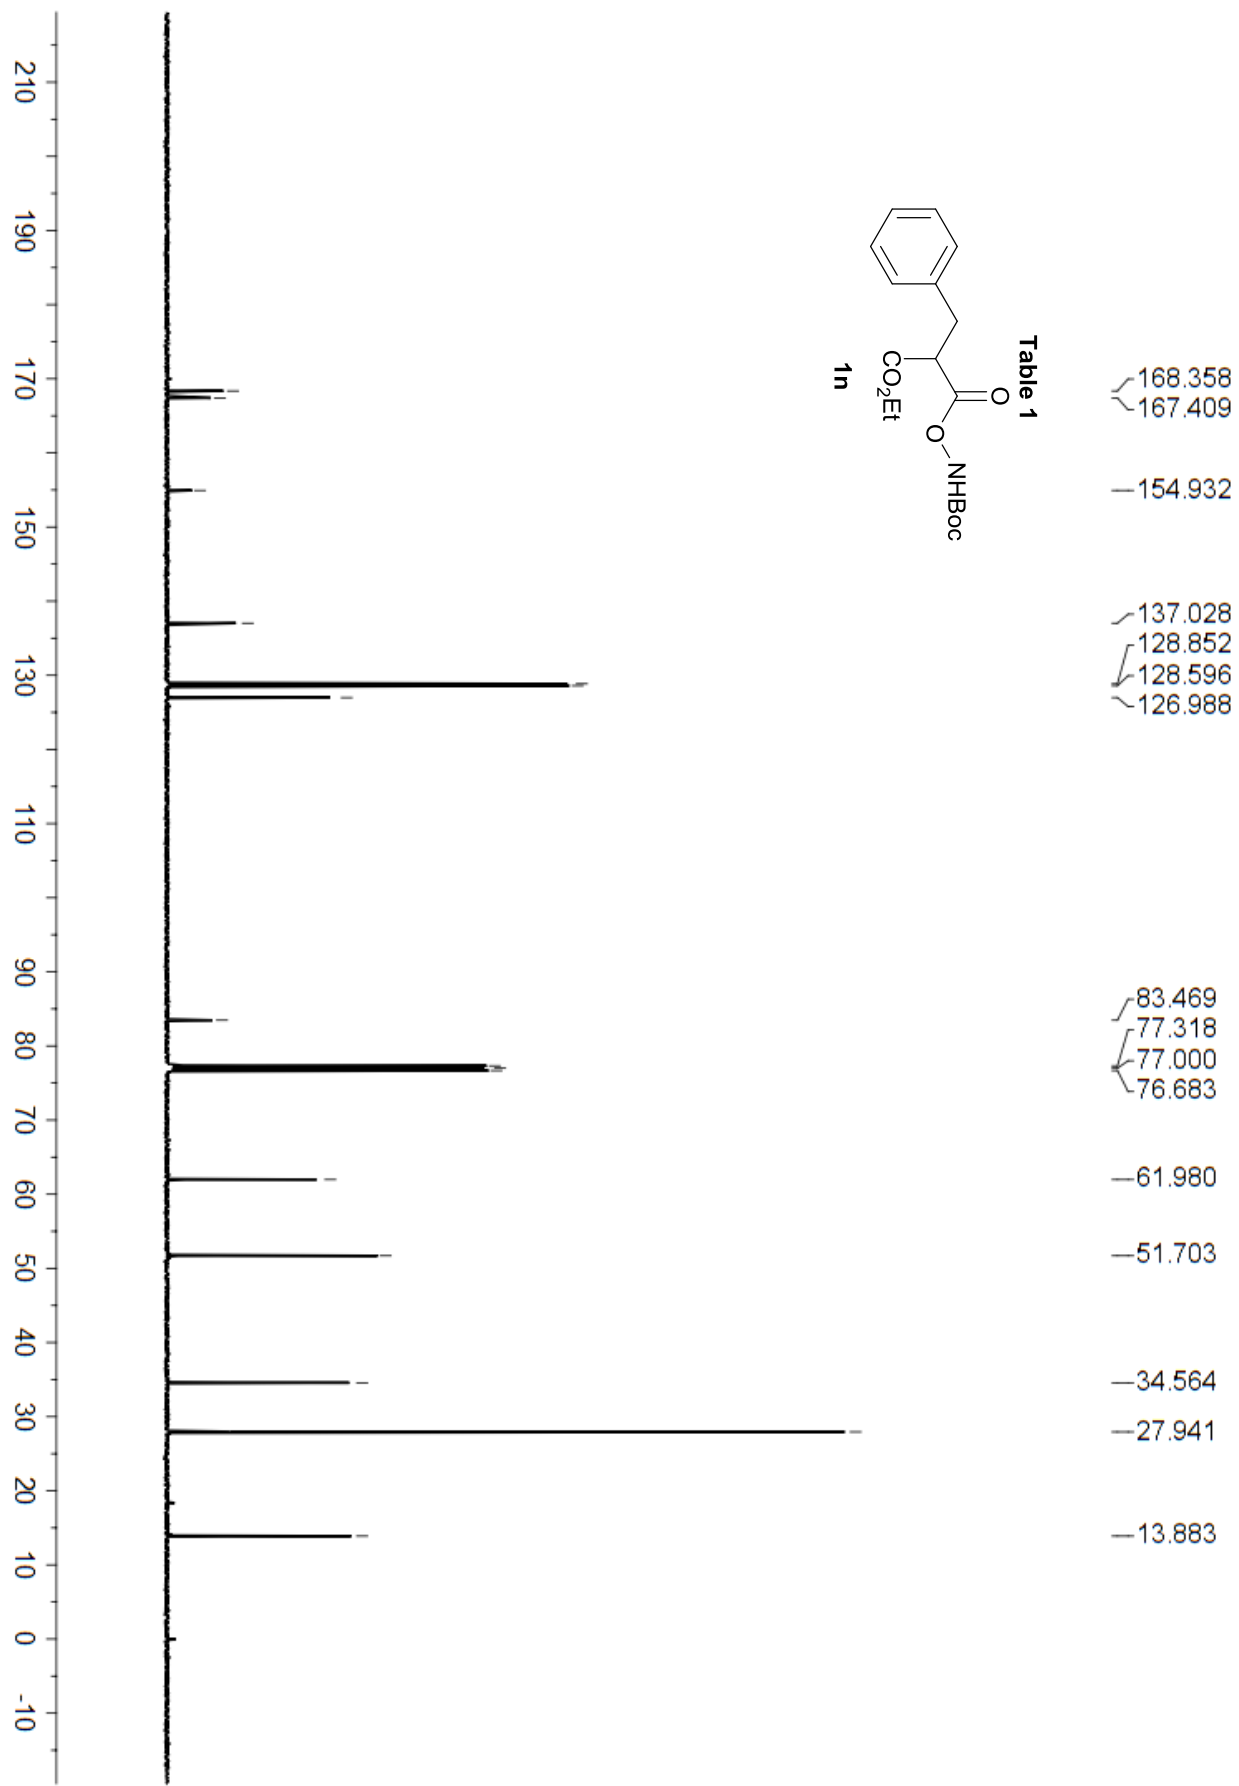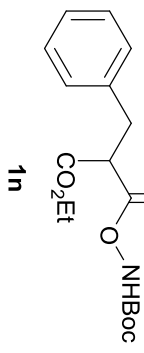

Table 1

- 168.358
- 167.409
- 154.932
- 137.028
- 128.852
- 128.596
- 126.988
- 83.469
- 77.318
- 77.000
- 76.683
- 61.980
- 51.703
- 34.564
- 27.941
- 13.883

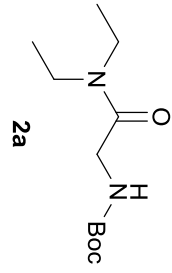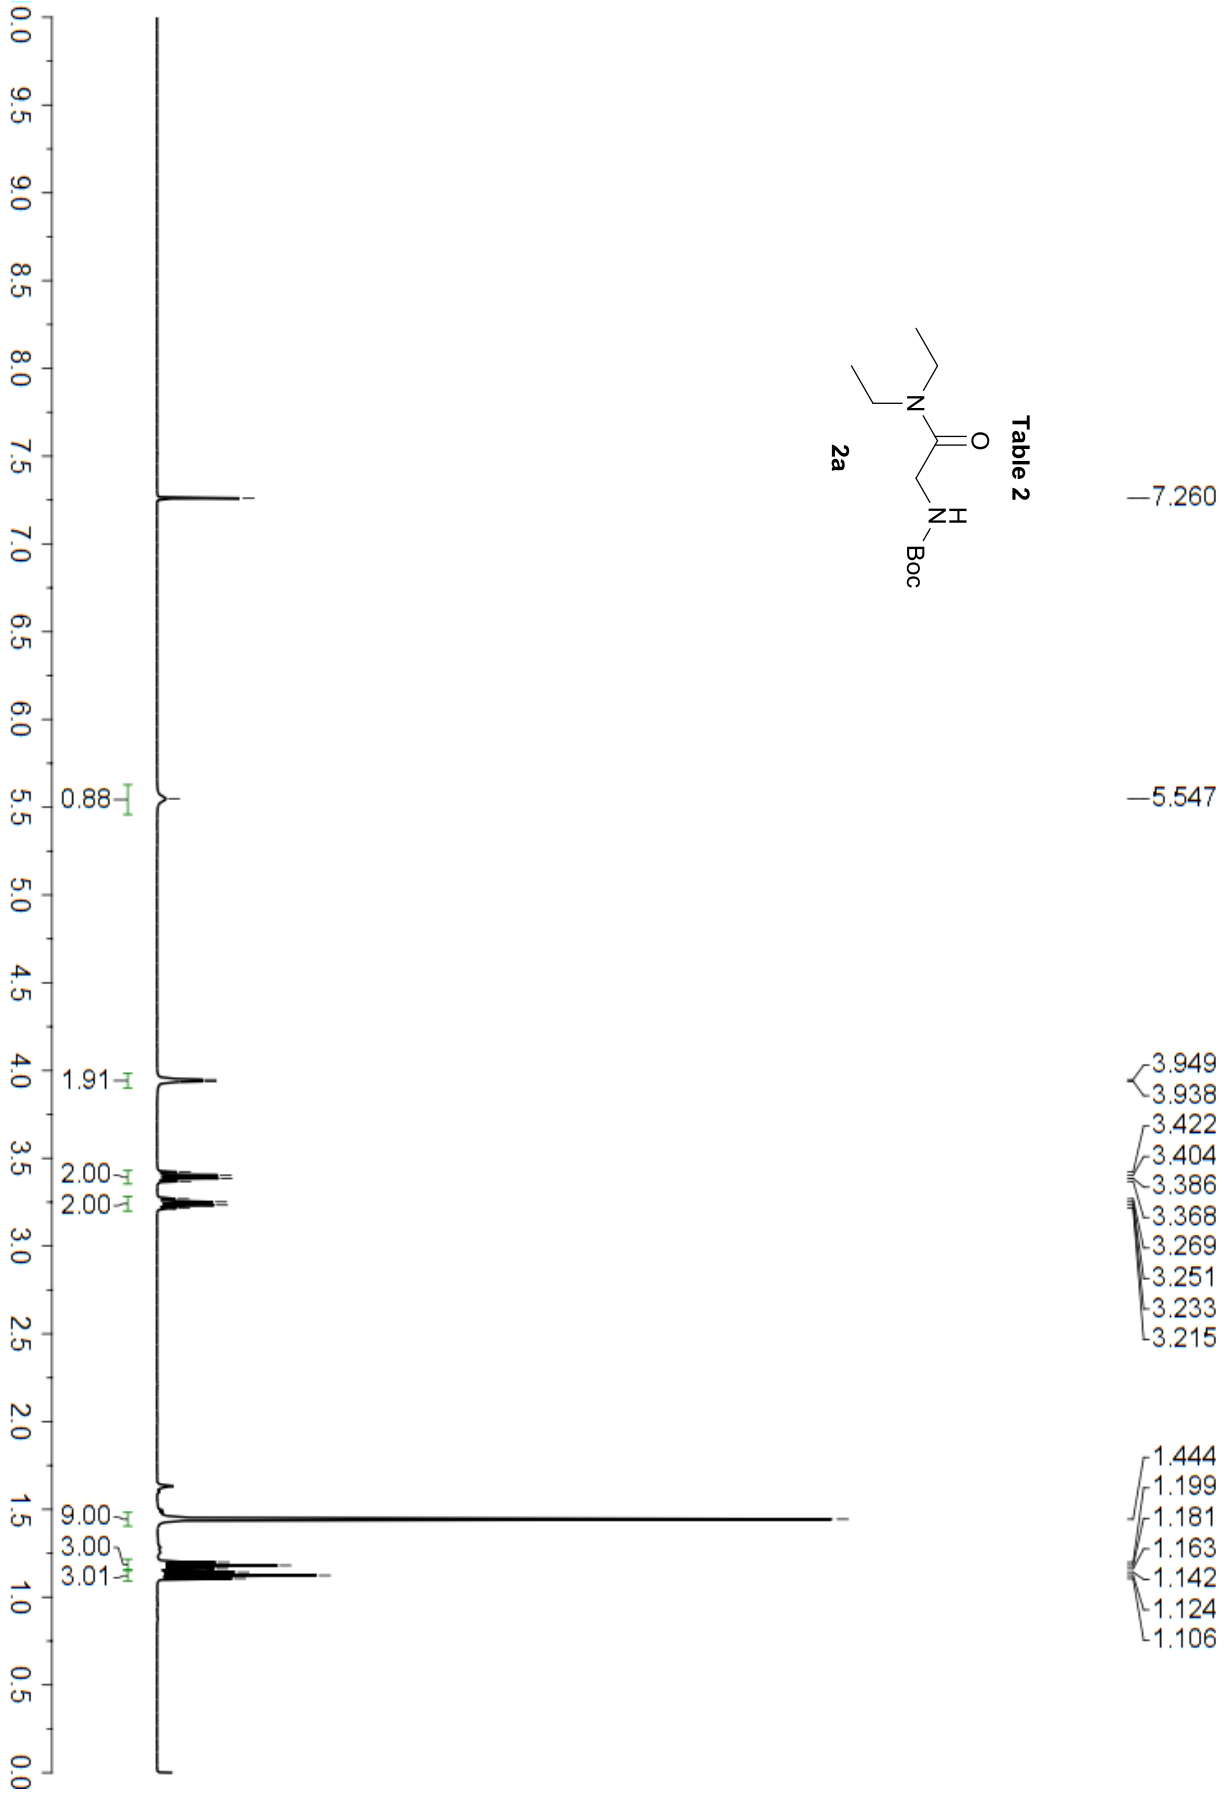

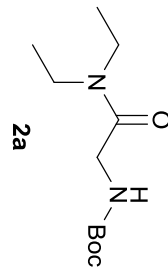

Table 2

—167.247

—155.802

79.448  
77.318  
77.000  
76.683

42.117  
40.884  
40.368

—28.336

13.965  
12.914

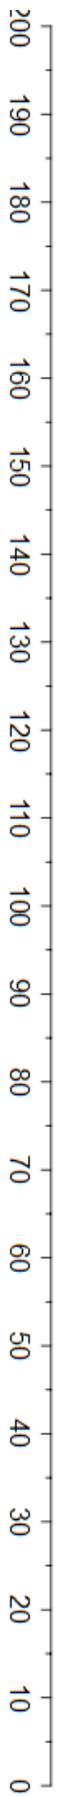

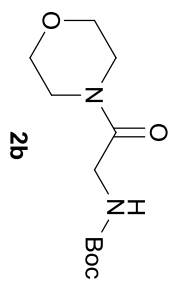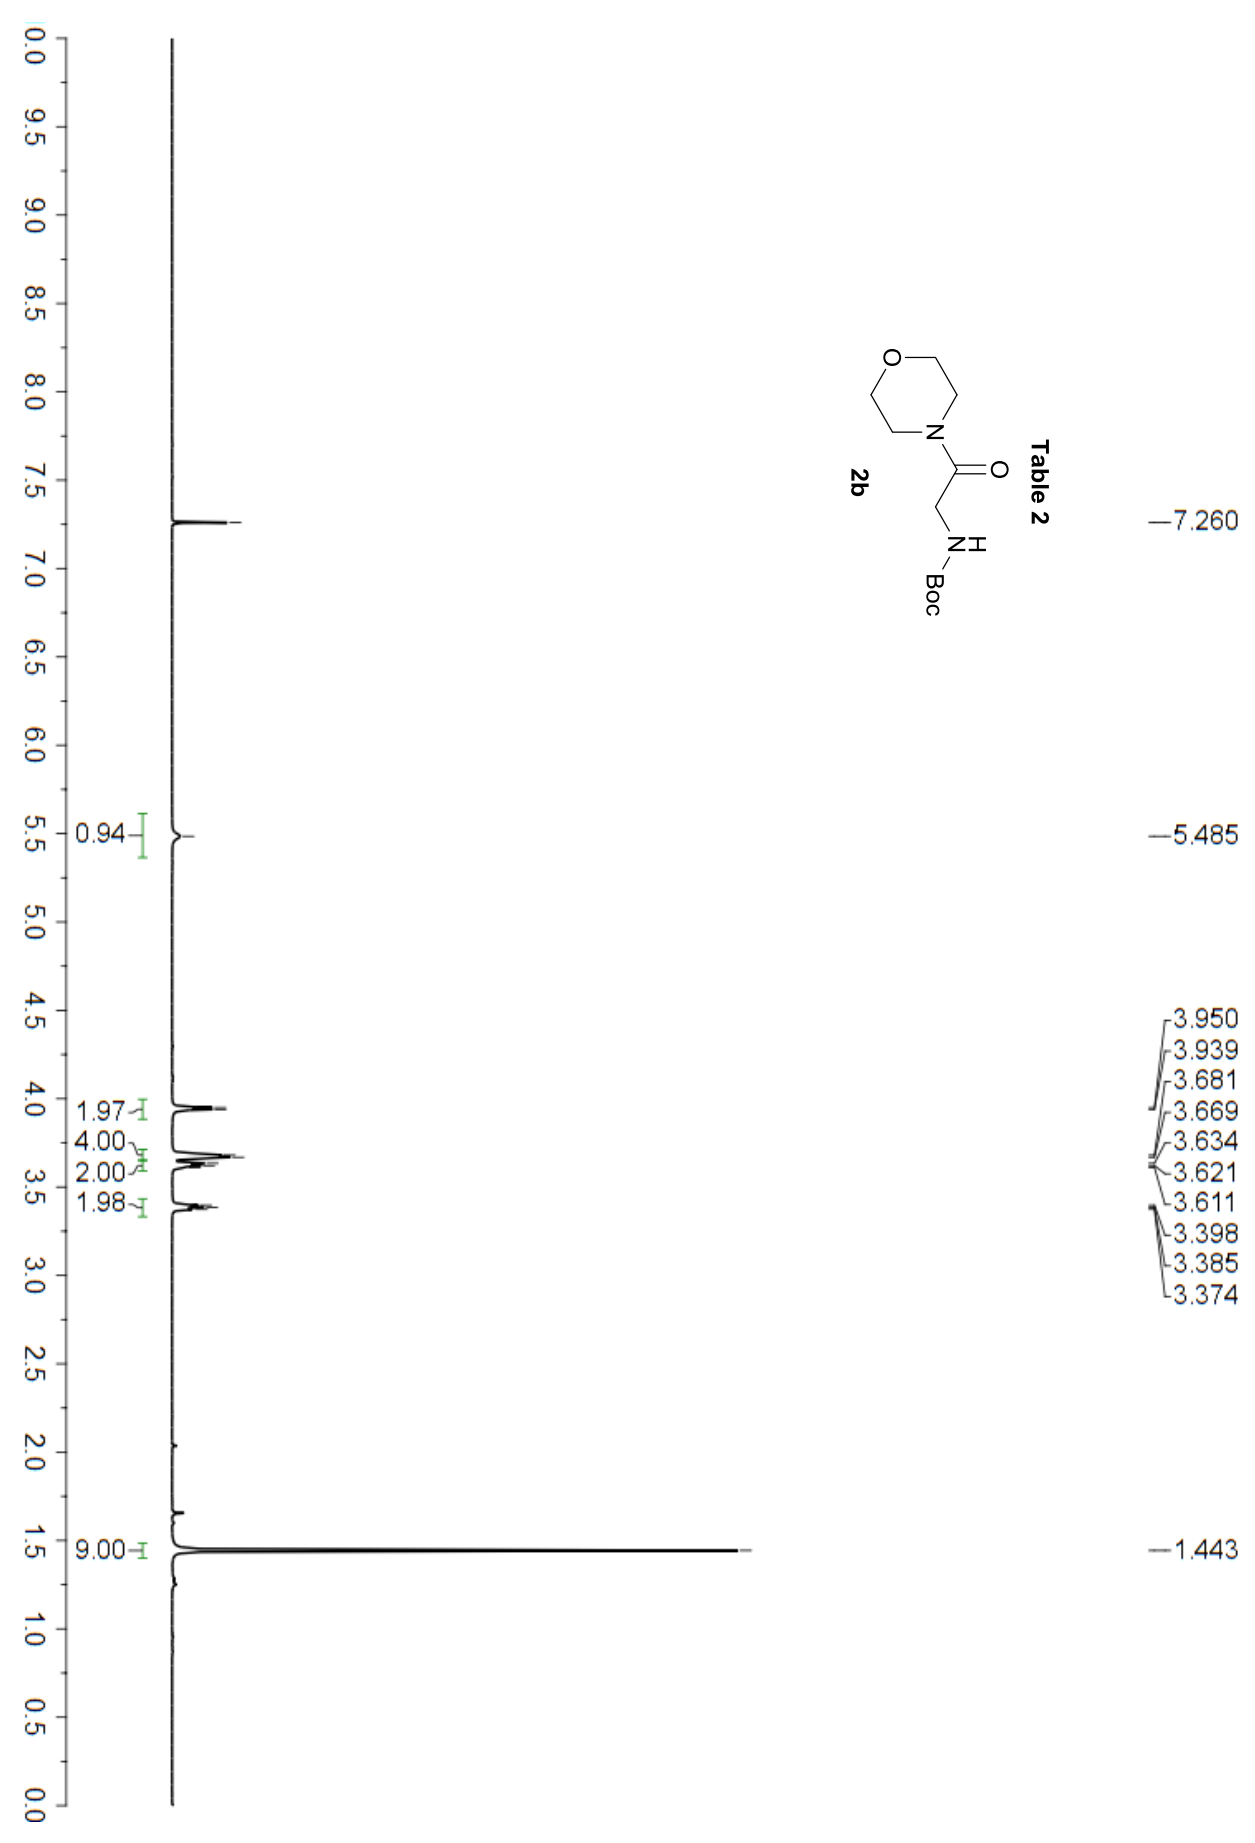

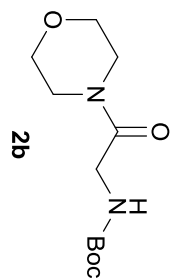

**Table 2**

—167.052

—155.768

79.702  
77.317  
77.000  
76.681  
66.691  
66.297

44.729  
42.197  
42.089

—28.309

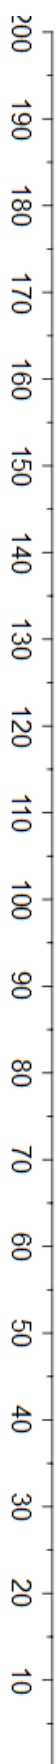

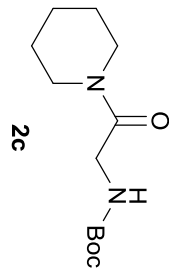

**Table 2**

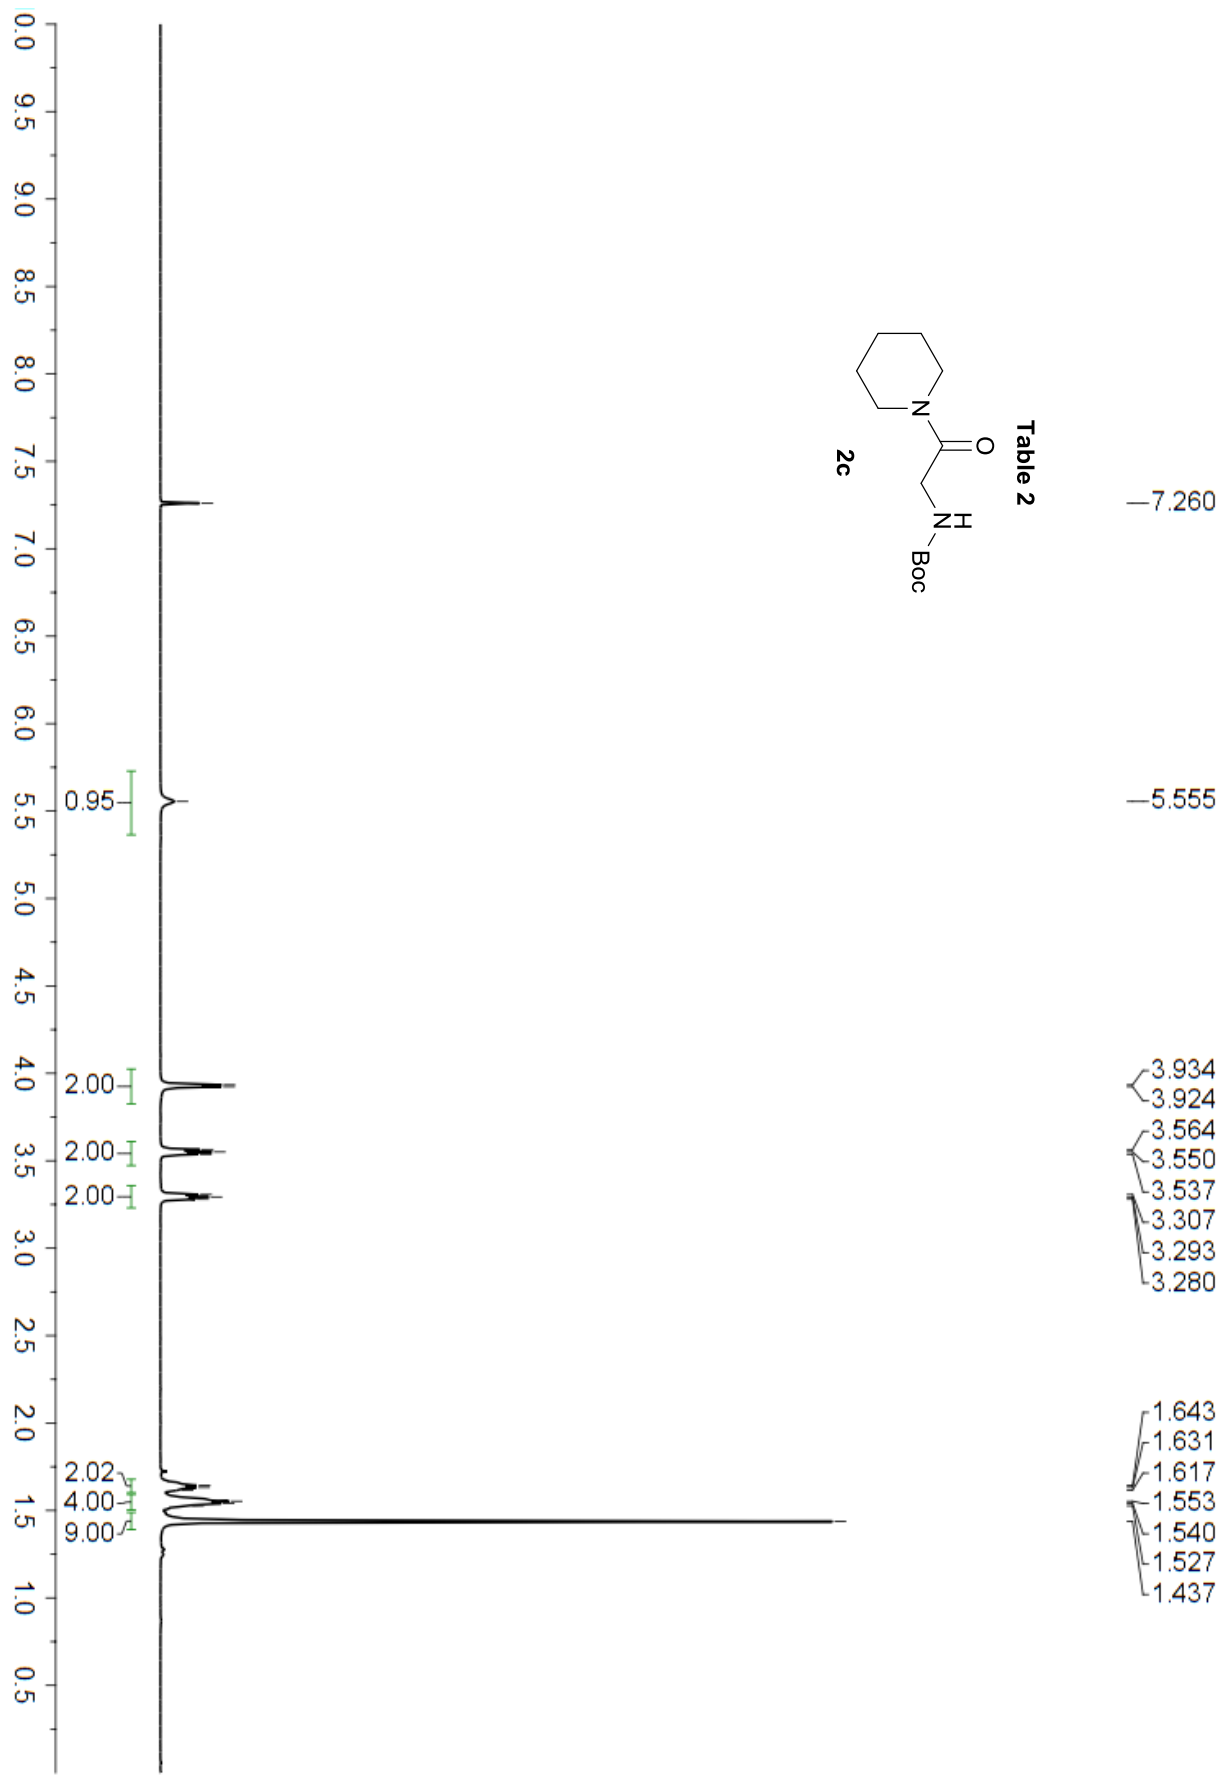



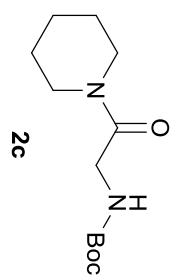

**Table 2**

— 166.322

— 155.809

79.438  
77.317  
77.000  
76.682

45.323  
43.053  
42.167

28.332  
26.124  
25.377  
24.343

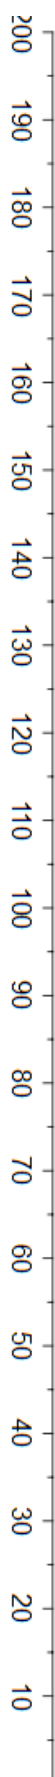

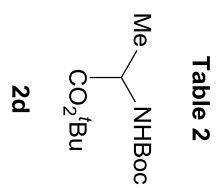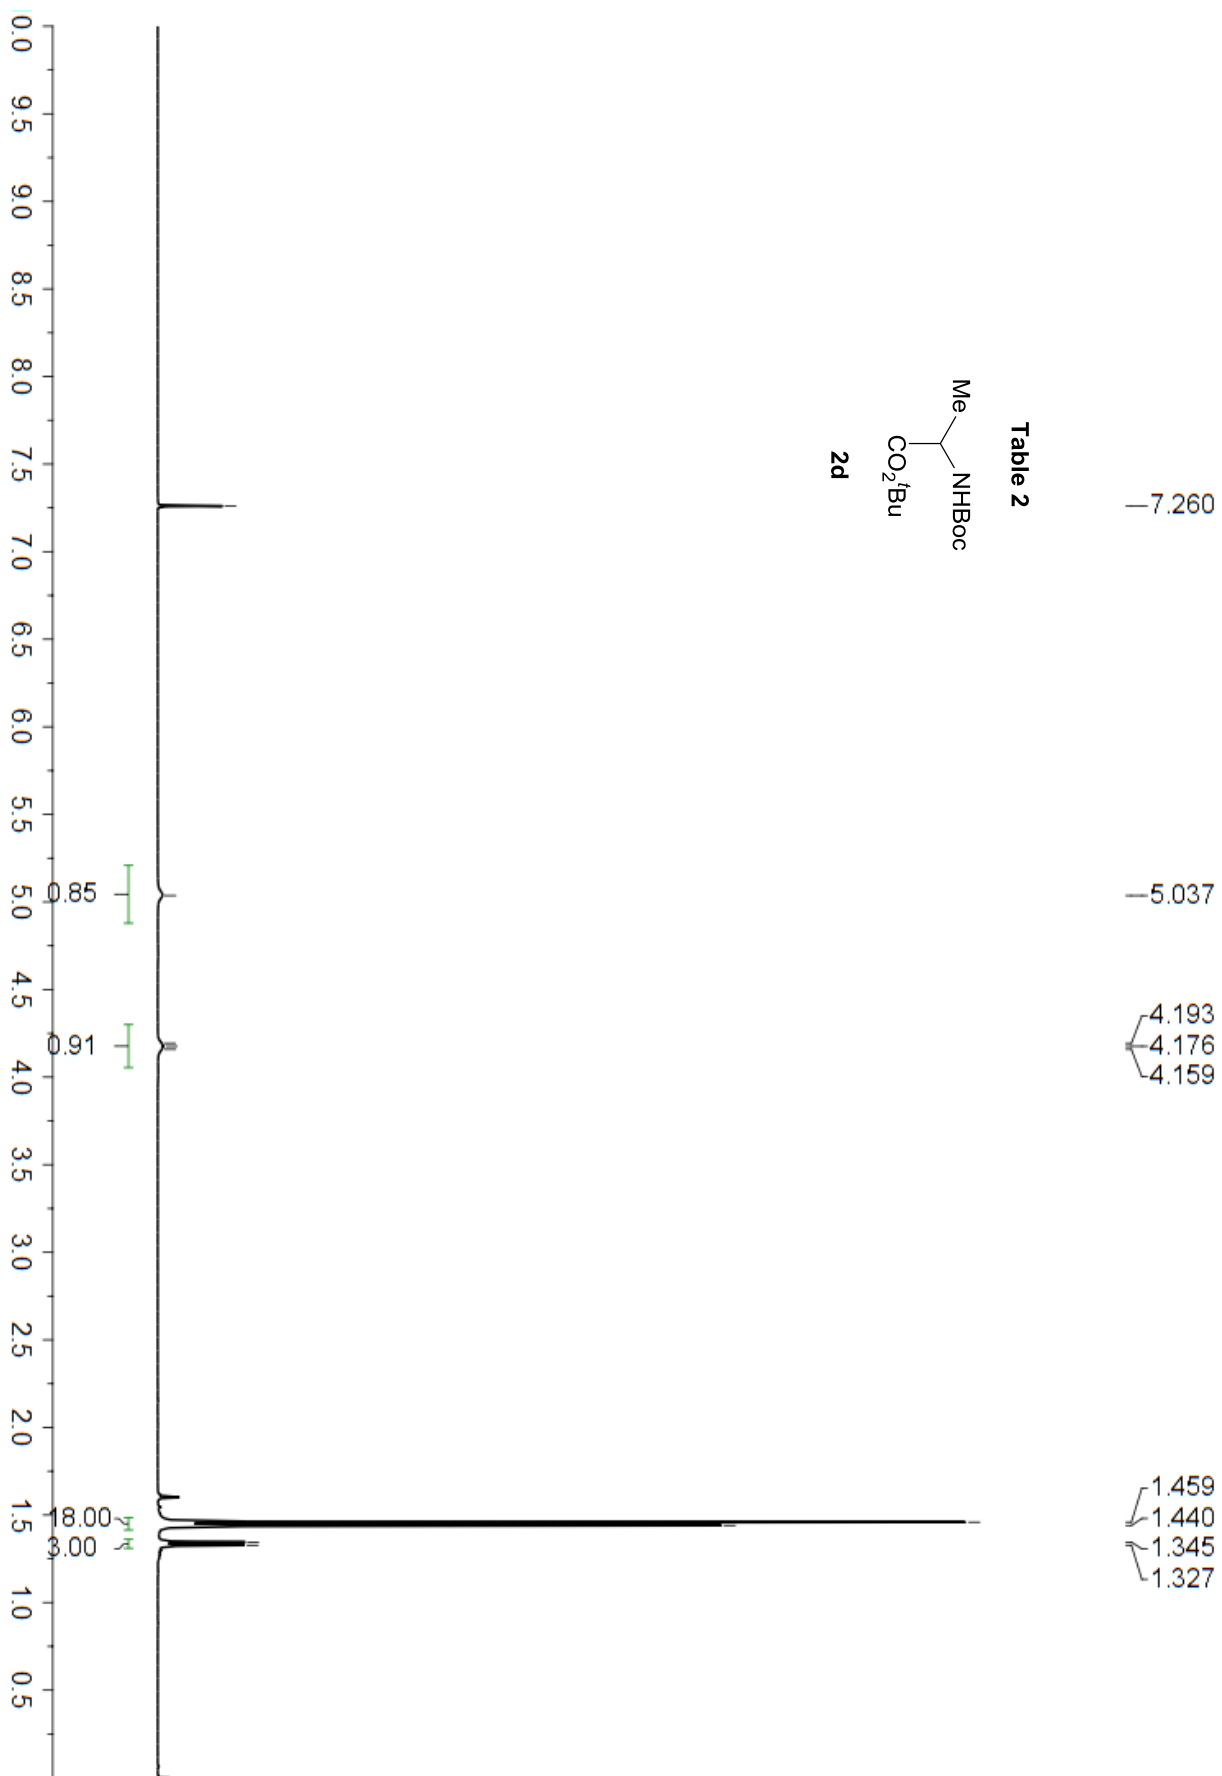

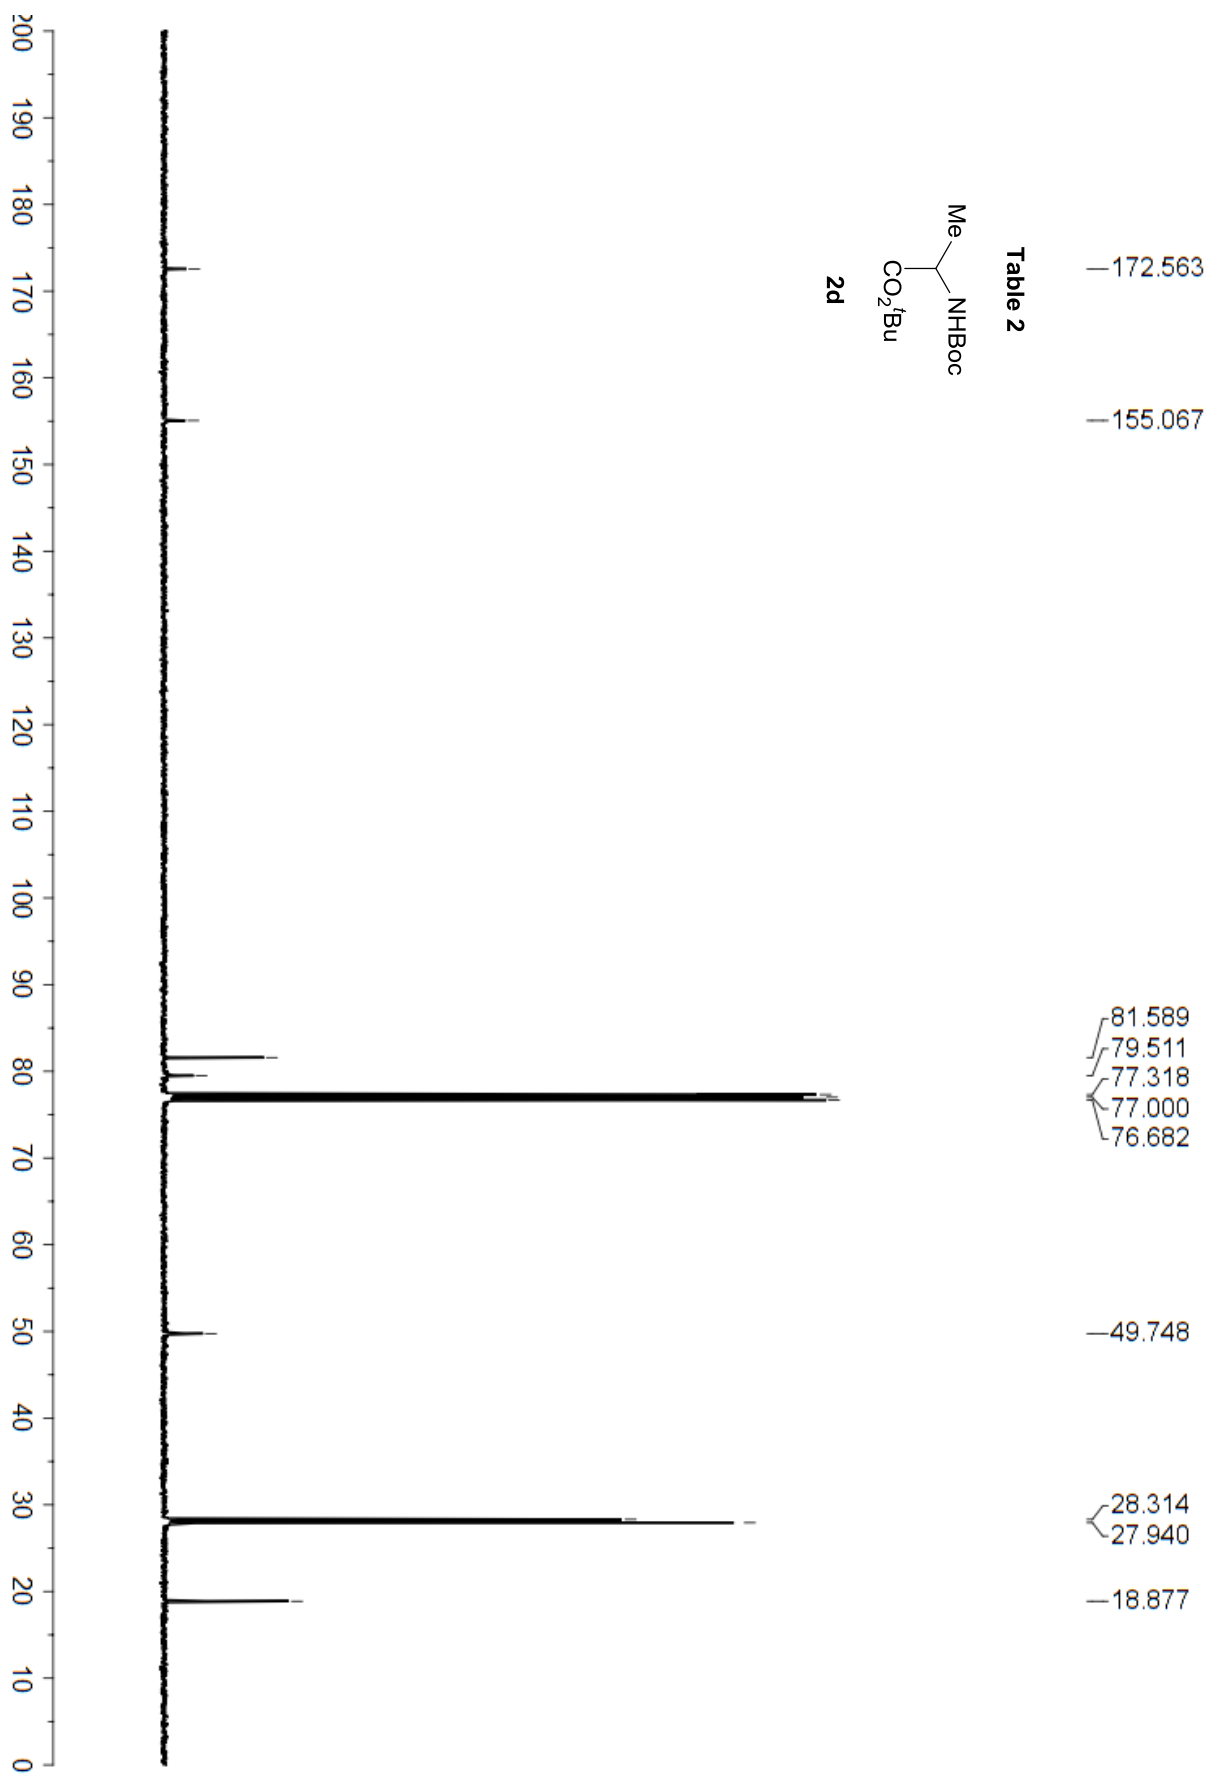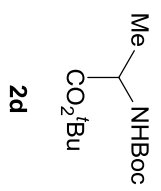

**Table 2**

|         |
|---------|
| 172.563 |
| 155.067 |
| 81.589  |
| 79.511  |
| 77.318  |
| 77.000  |
| 76.682  |
| 49.748  |
| 28.314  |
| 27.940  |
| 18.877  |

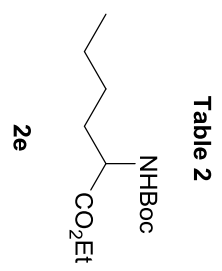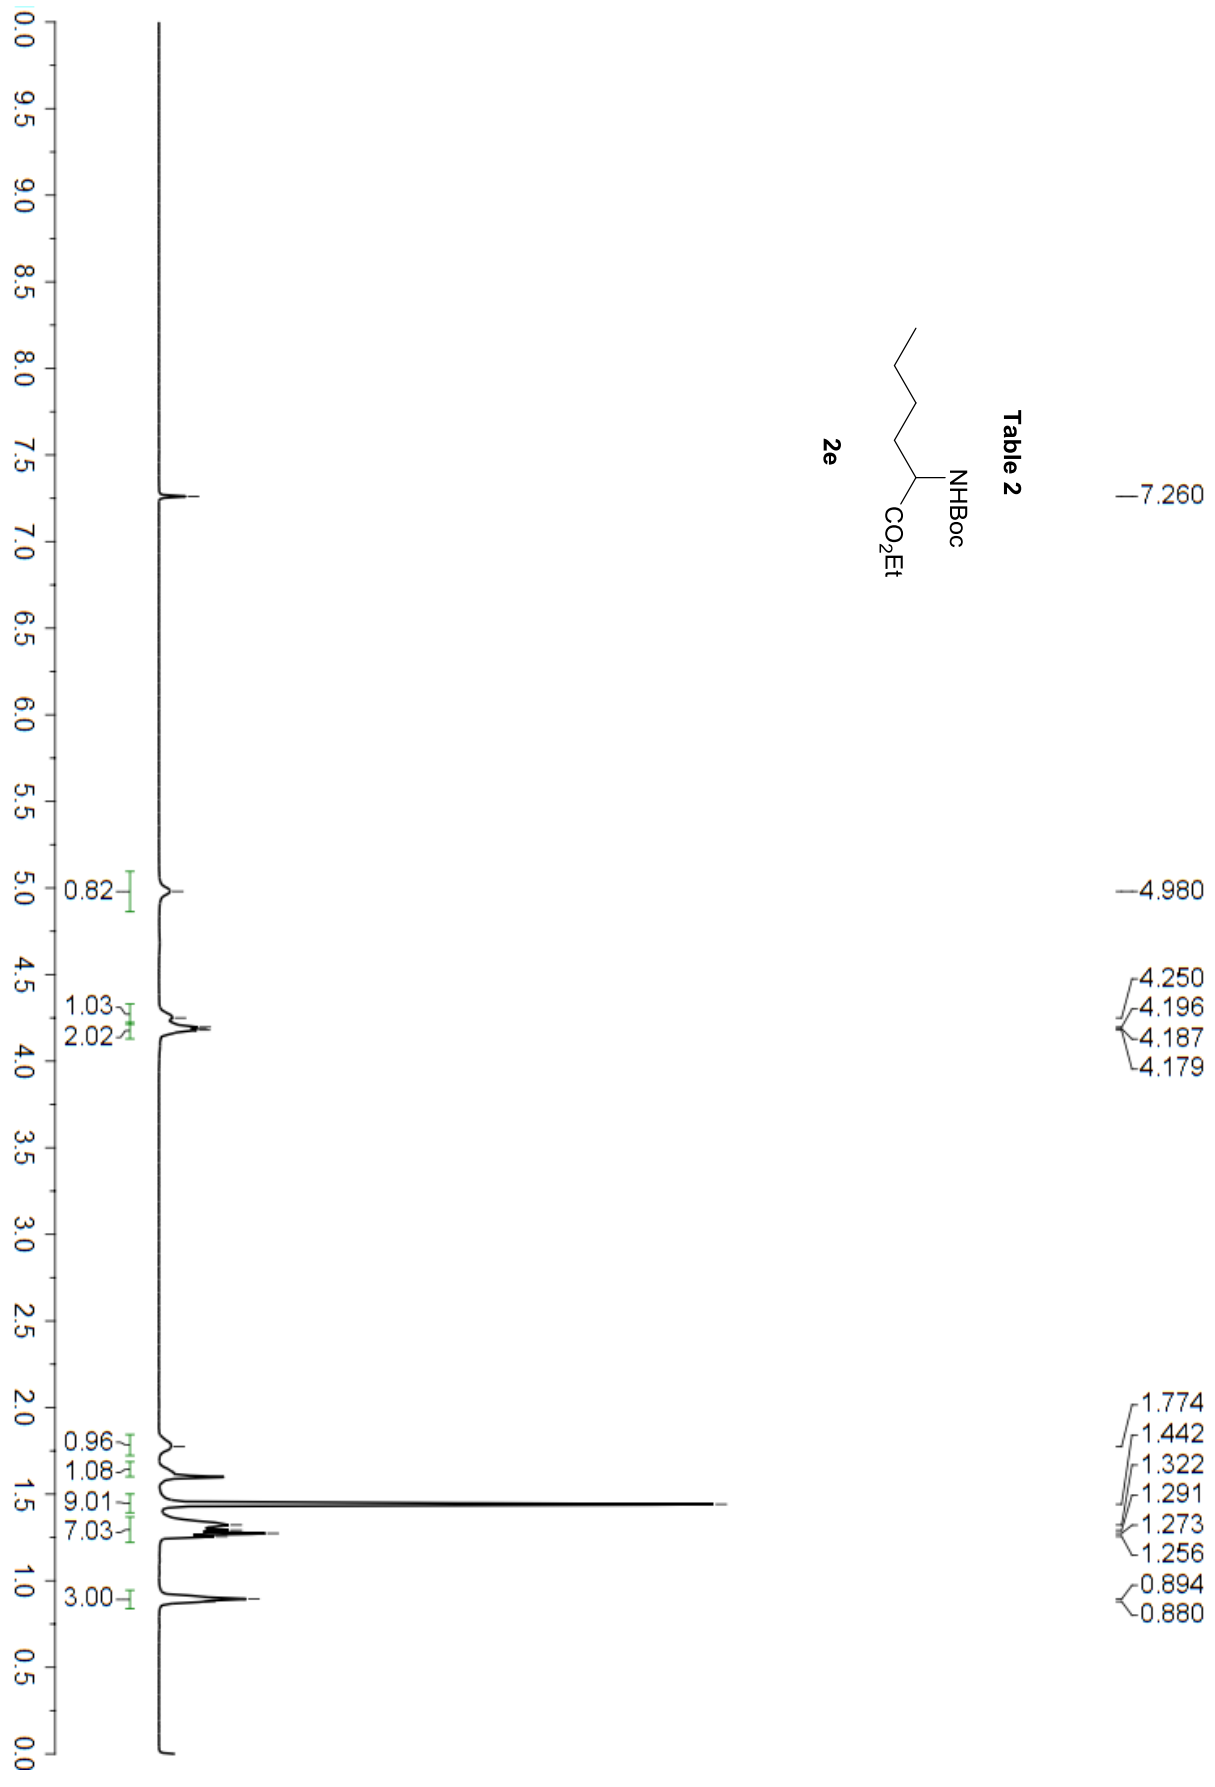

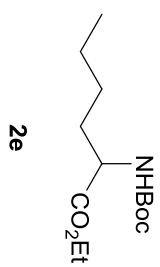

**Table 2**

— 173.008

— 155.371

{ 79.693  
 { 77.317  
 { 77.000  
 { 76.682

— 61.127

— 53.474

— 32.475

— 28.300

— 27.334

— 22.282

— 14.165

— 13.825

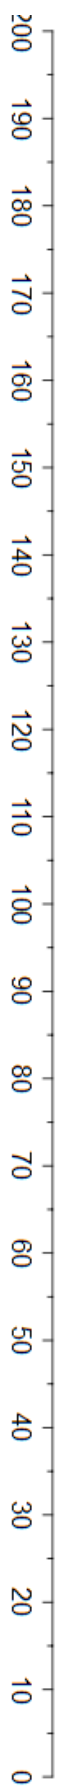

-7.260

-4.977

4.249  
4.195  
4.186  
4.178

1.768  
1.609  
1.603  
1.440  
1.290  
1.272  
0.874  
0.858

Table 2

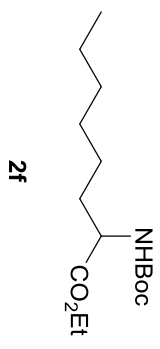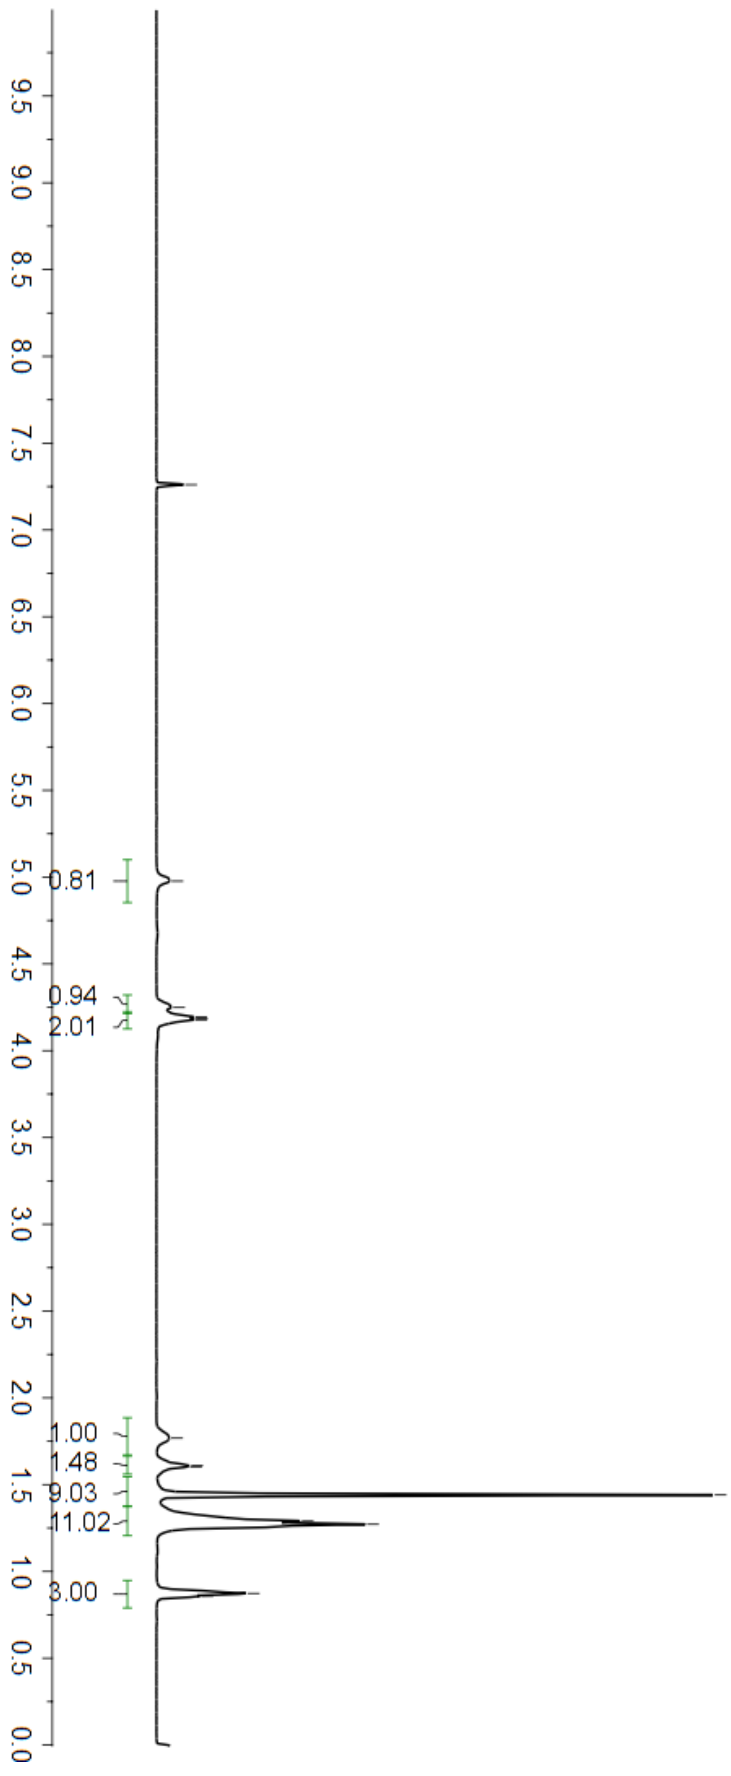

— 173.021

— 155.370

79.703  
77.318  
77.000  
76.683

— 61.130

— 53.521

32.785  
31.562  
28.844  
28.309  
25.159  
22.488  
14.176  
13.998

Table 2

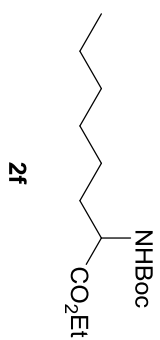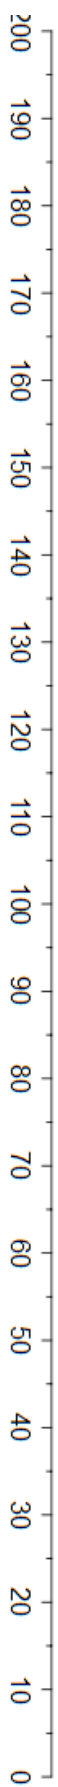

-7.260

4.989  
4.975

4.245  
4.191  
4.182  
4.174  
4.127

1.764  
1.627  
1.618  
1.594  
1.437  
1.284  
1.267  
1.254  
0.868  
0.852

Table 2

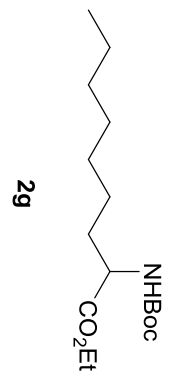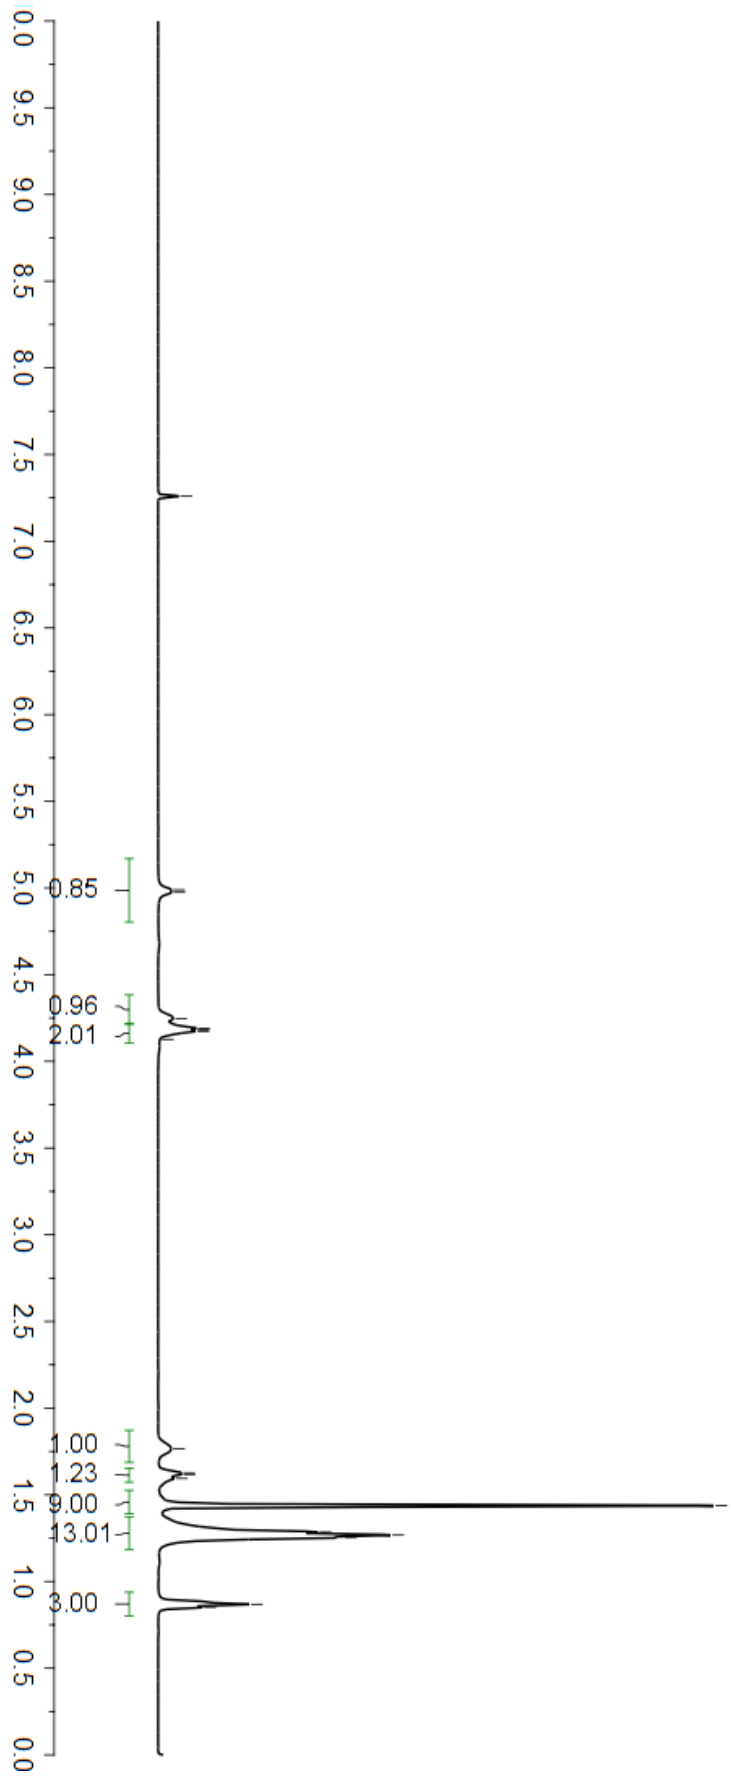



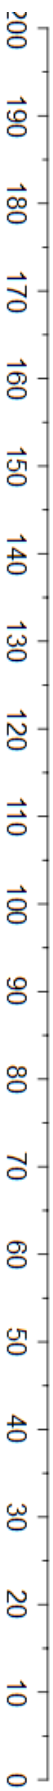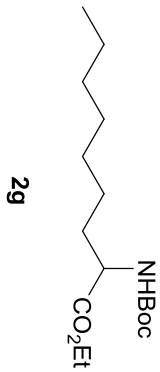

Table 2

|   |         |
|---|---------|
| — | 173.015 |
| — | 155.370 |
| { | 79.689  |
| { | 77.318  |
| { | 77.000  |
| { | 76.682  |
| — | 61.124  |
| — | 53.507  |
| { | 32.777  |
| { | 31.676  |
| { | 29.130  |
| { | 29.019  |
| { | 28.305  |
| { | 25.192  |
| { | 22.576  |
| { | 14.172  |
| { | 14.031  |

-7.260

4.988  
4.973

4.246  
4.193  
4.184  
4.175

1.765  
1.607  
1.439  
1.287  
1.267  
1.254  
0.883  
0.872  
0.855

Table 2

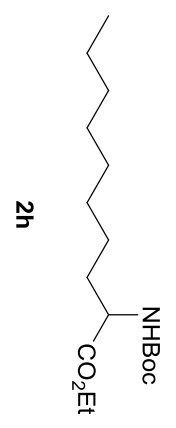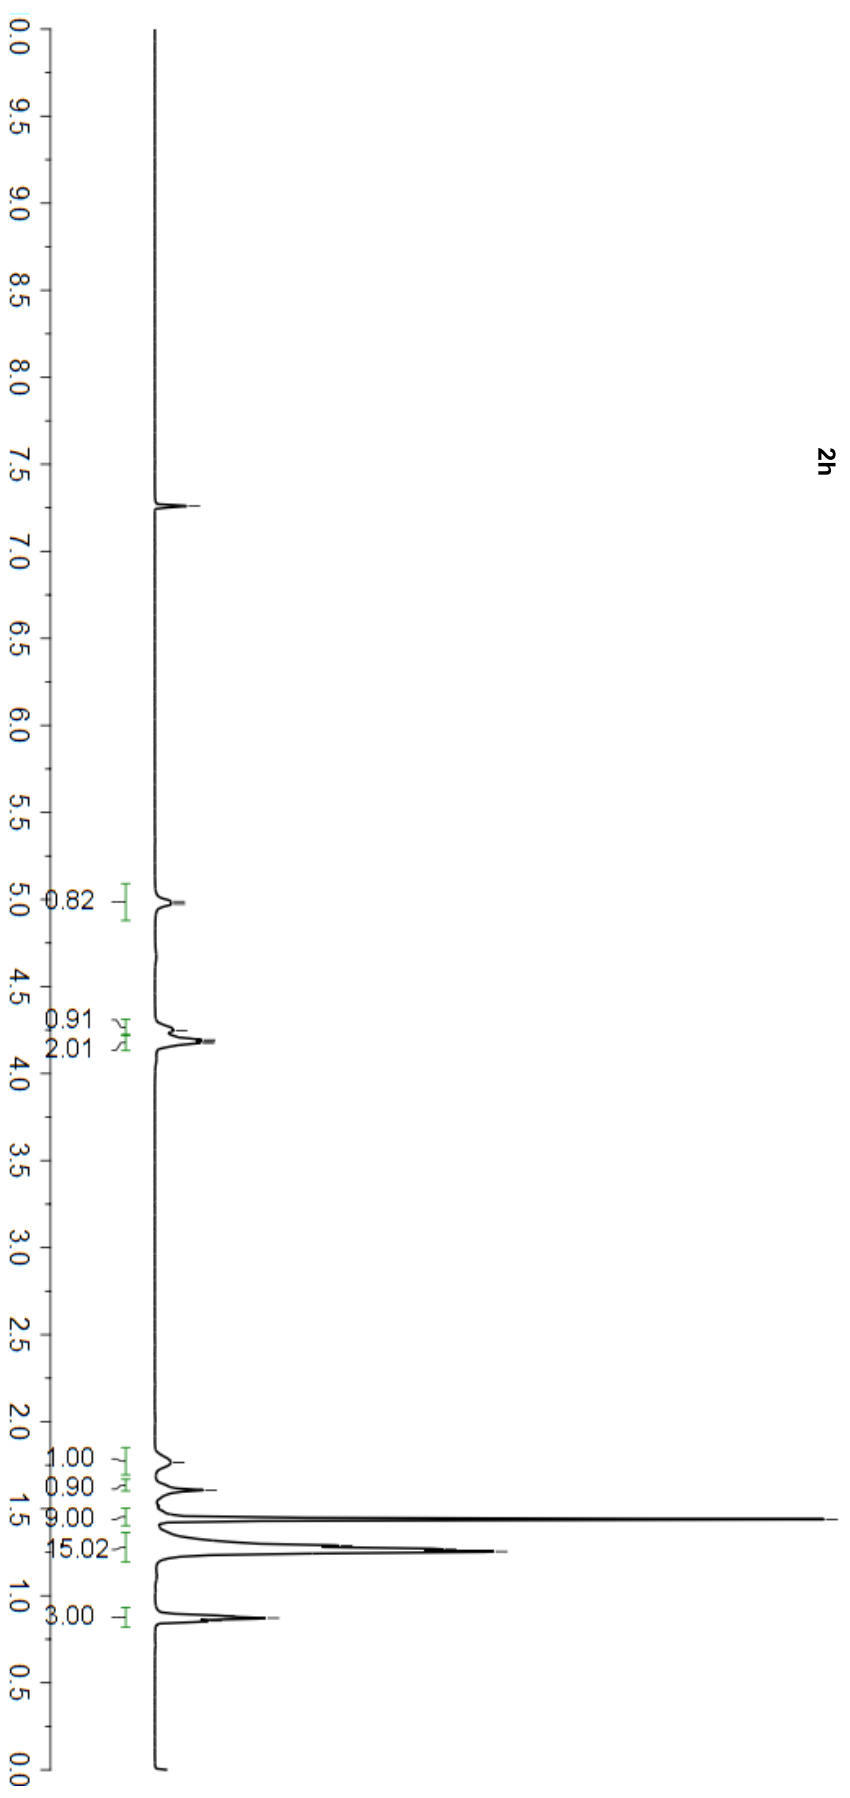

-173.019

-155.364

Table 2

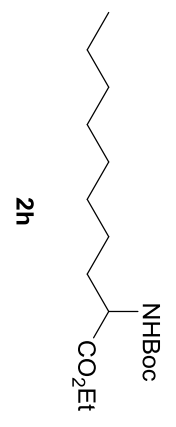

79.699  
77.317  
77.000  
76.682

-61.129

-53.505

32.788  
31.796  
29.322  
29.180  
29.134  
28.310  
25.195  
22.618  
14.177  
14.057

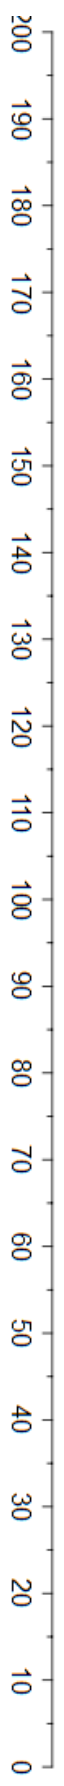

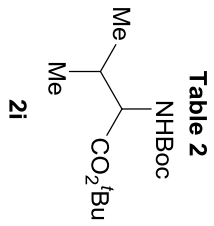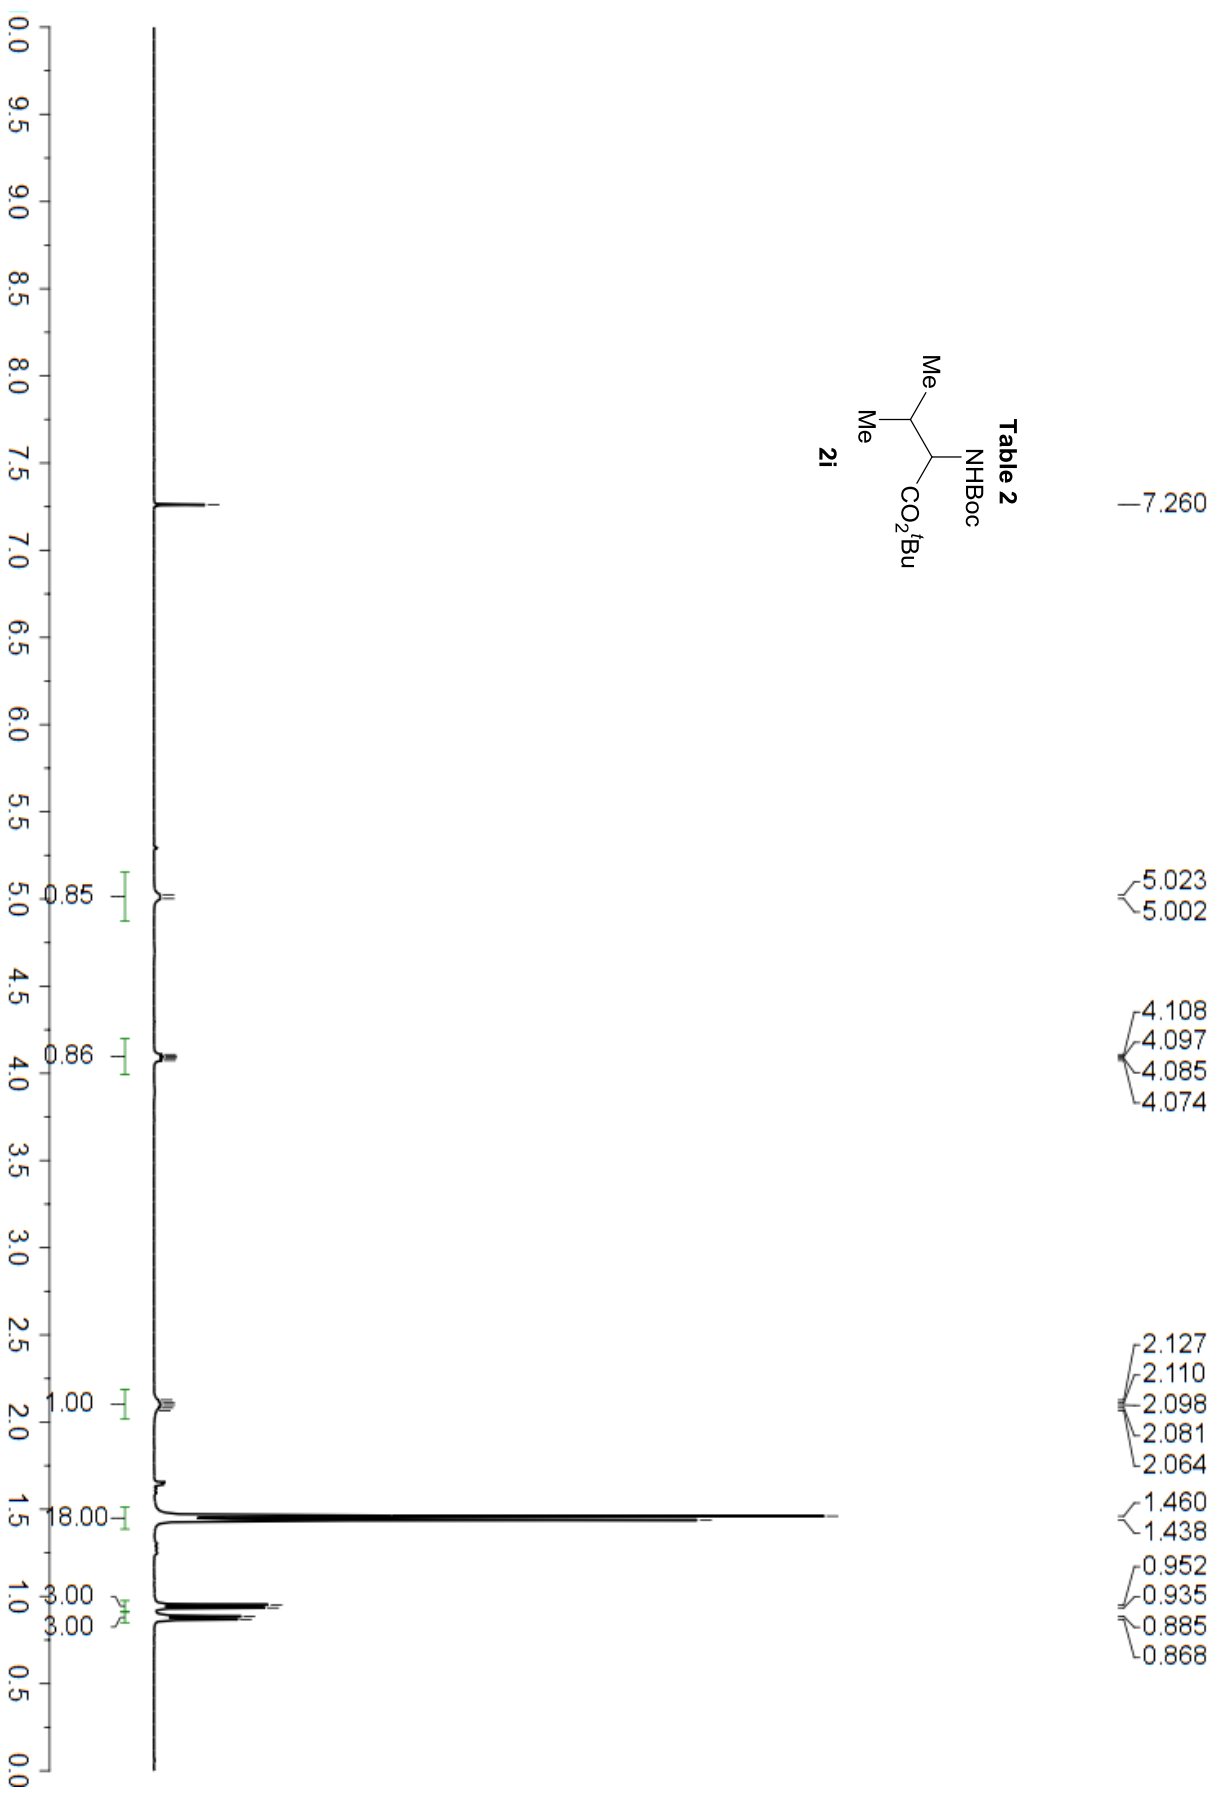

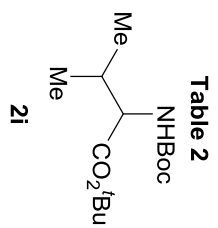

— 171.510

— 155.710

81.632  
 79.455  
 77.318  
 77.000  
 76.683

— 58.818

31.469  
 28.308  
 28.032

18.893  
 17.446

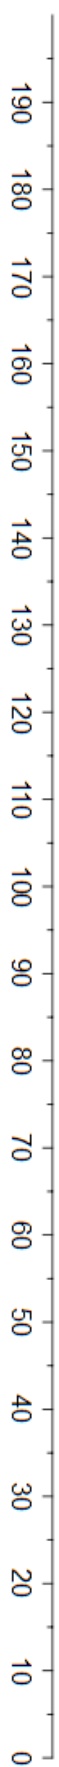

-7.260

4.881  
4.862

4.198  
4.178  
4.163  
4.143

1.731  
1.714  
1.697  
1.680  
1.664  
1.648  
1.623  
1.610  
1.591  
1.574  
1.557  
1.540  
1.523  
1.454  
1.435  
0.945  
0.929

Table 2

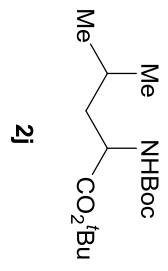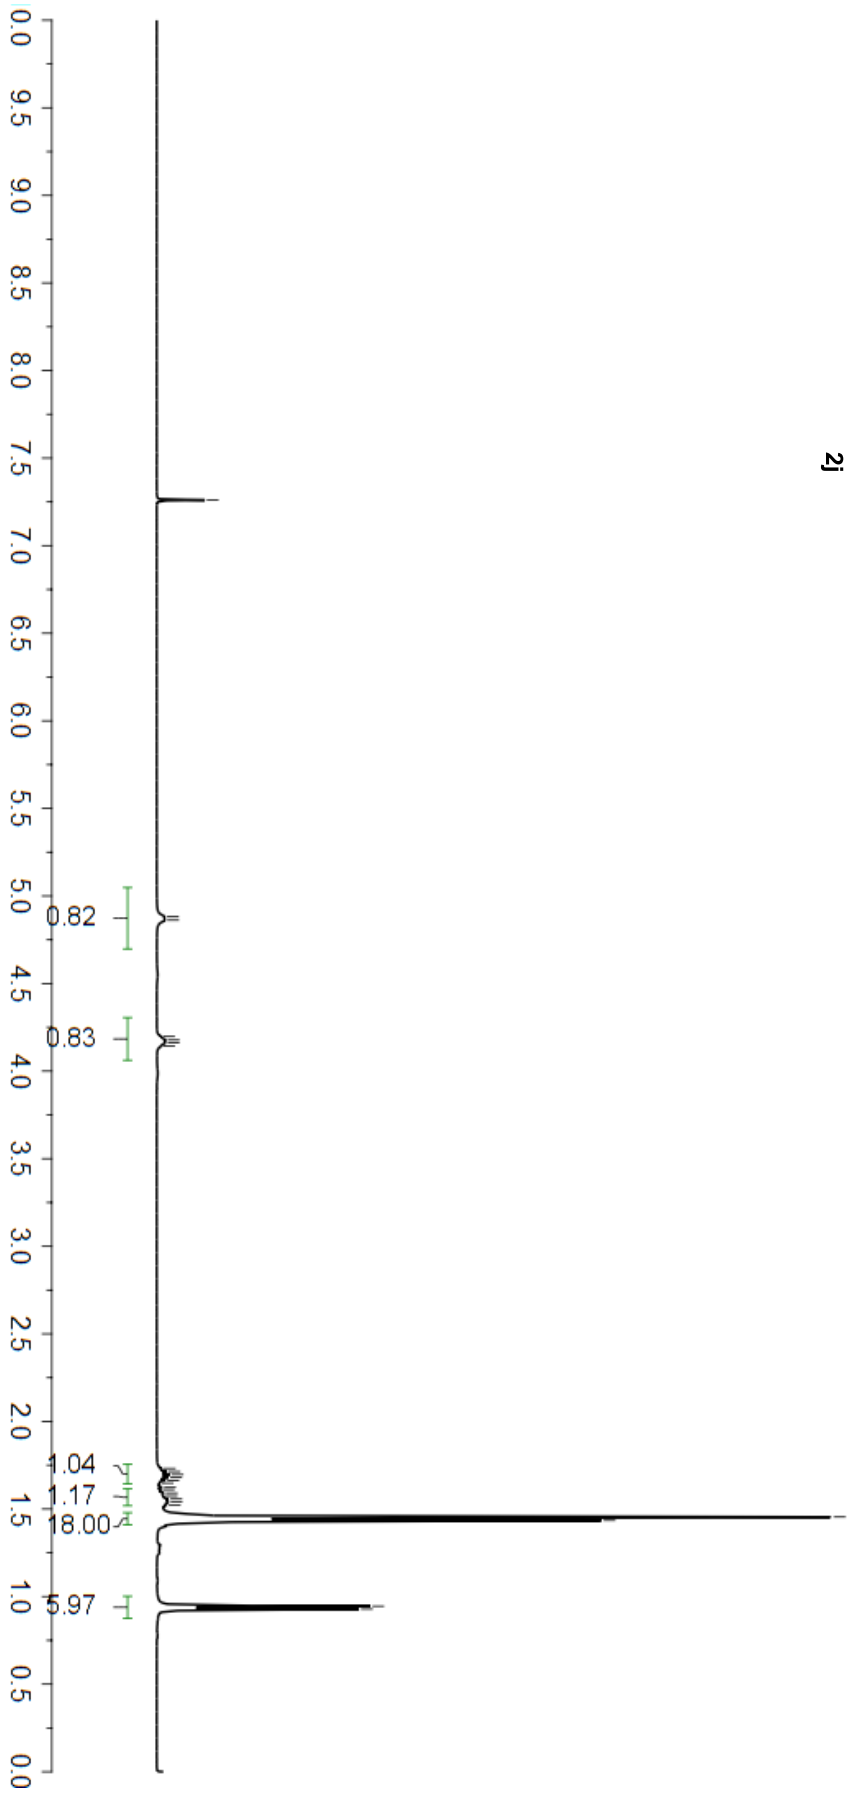

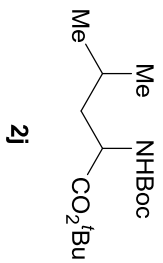

**Table 2**

— 172.664

— 155.383

81.477  
 79.485  
 77.318  
 77.000  
 76.683

— 52.663

— 42.138

28.307  
 27.973  
 24.829  
 22.782  
 22.089

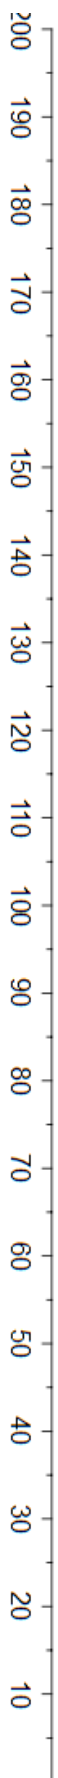

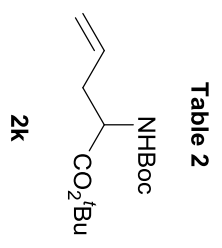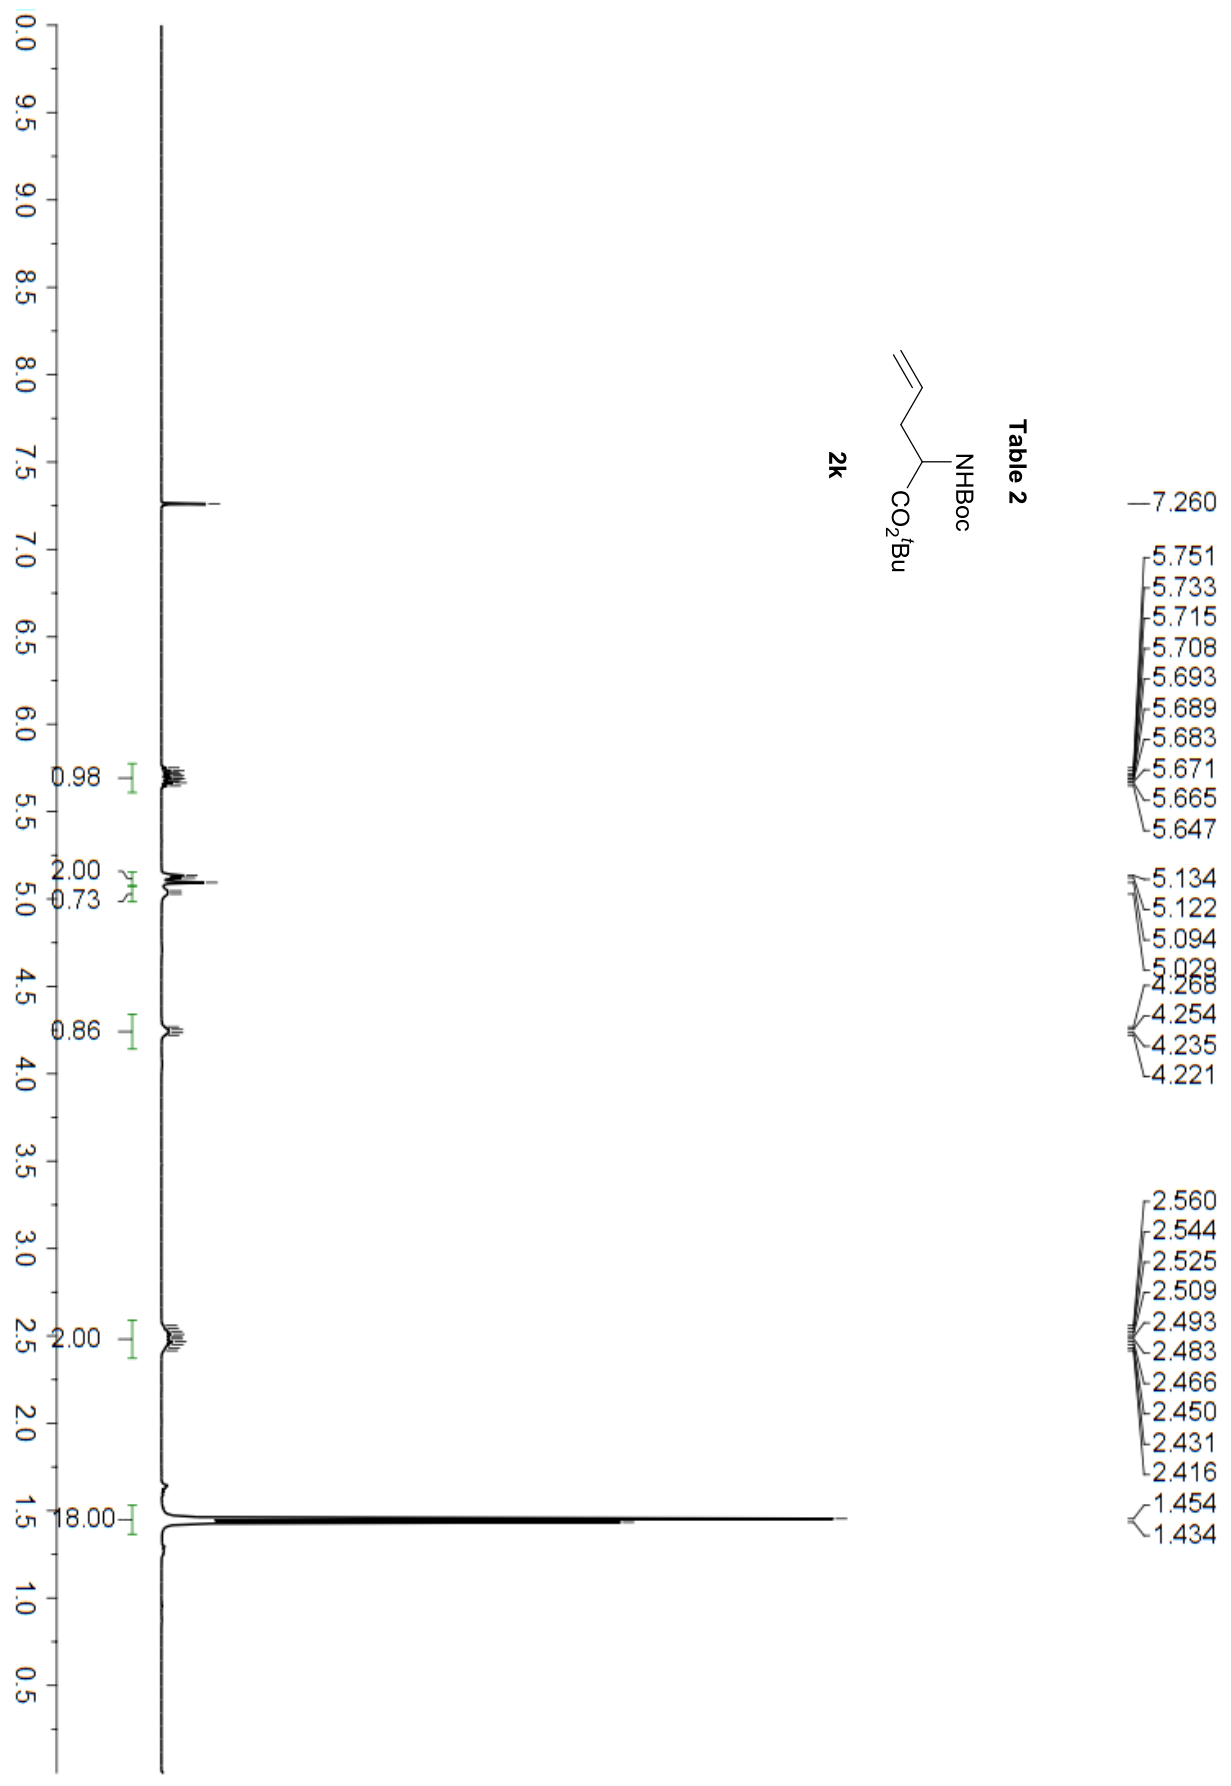



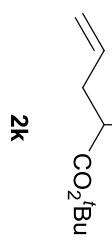

Table 2

|   |         |
|---|---------|
| — | 171.118 |
| — | 155.172 |
| — | 132.526 |
| — | 118.735 |
| { | 81.881  |
| { | 79.584  |
| { | 77.317  |
| { | 77.000  |
| { | 76.682  |
| — | 53.280  |
| — | 37.046  |
| { | 28.297  |
| { | 28.012  |

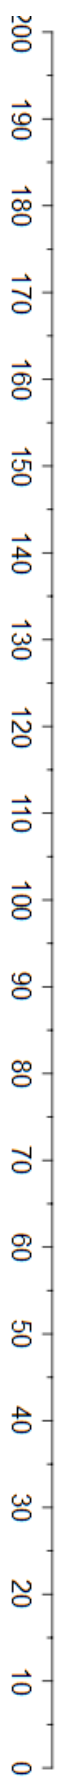

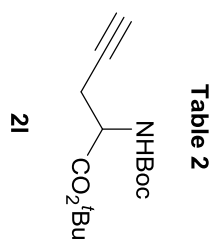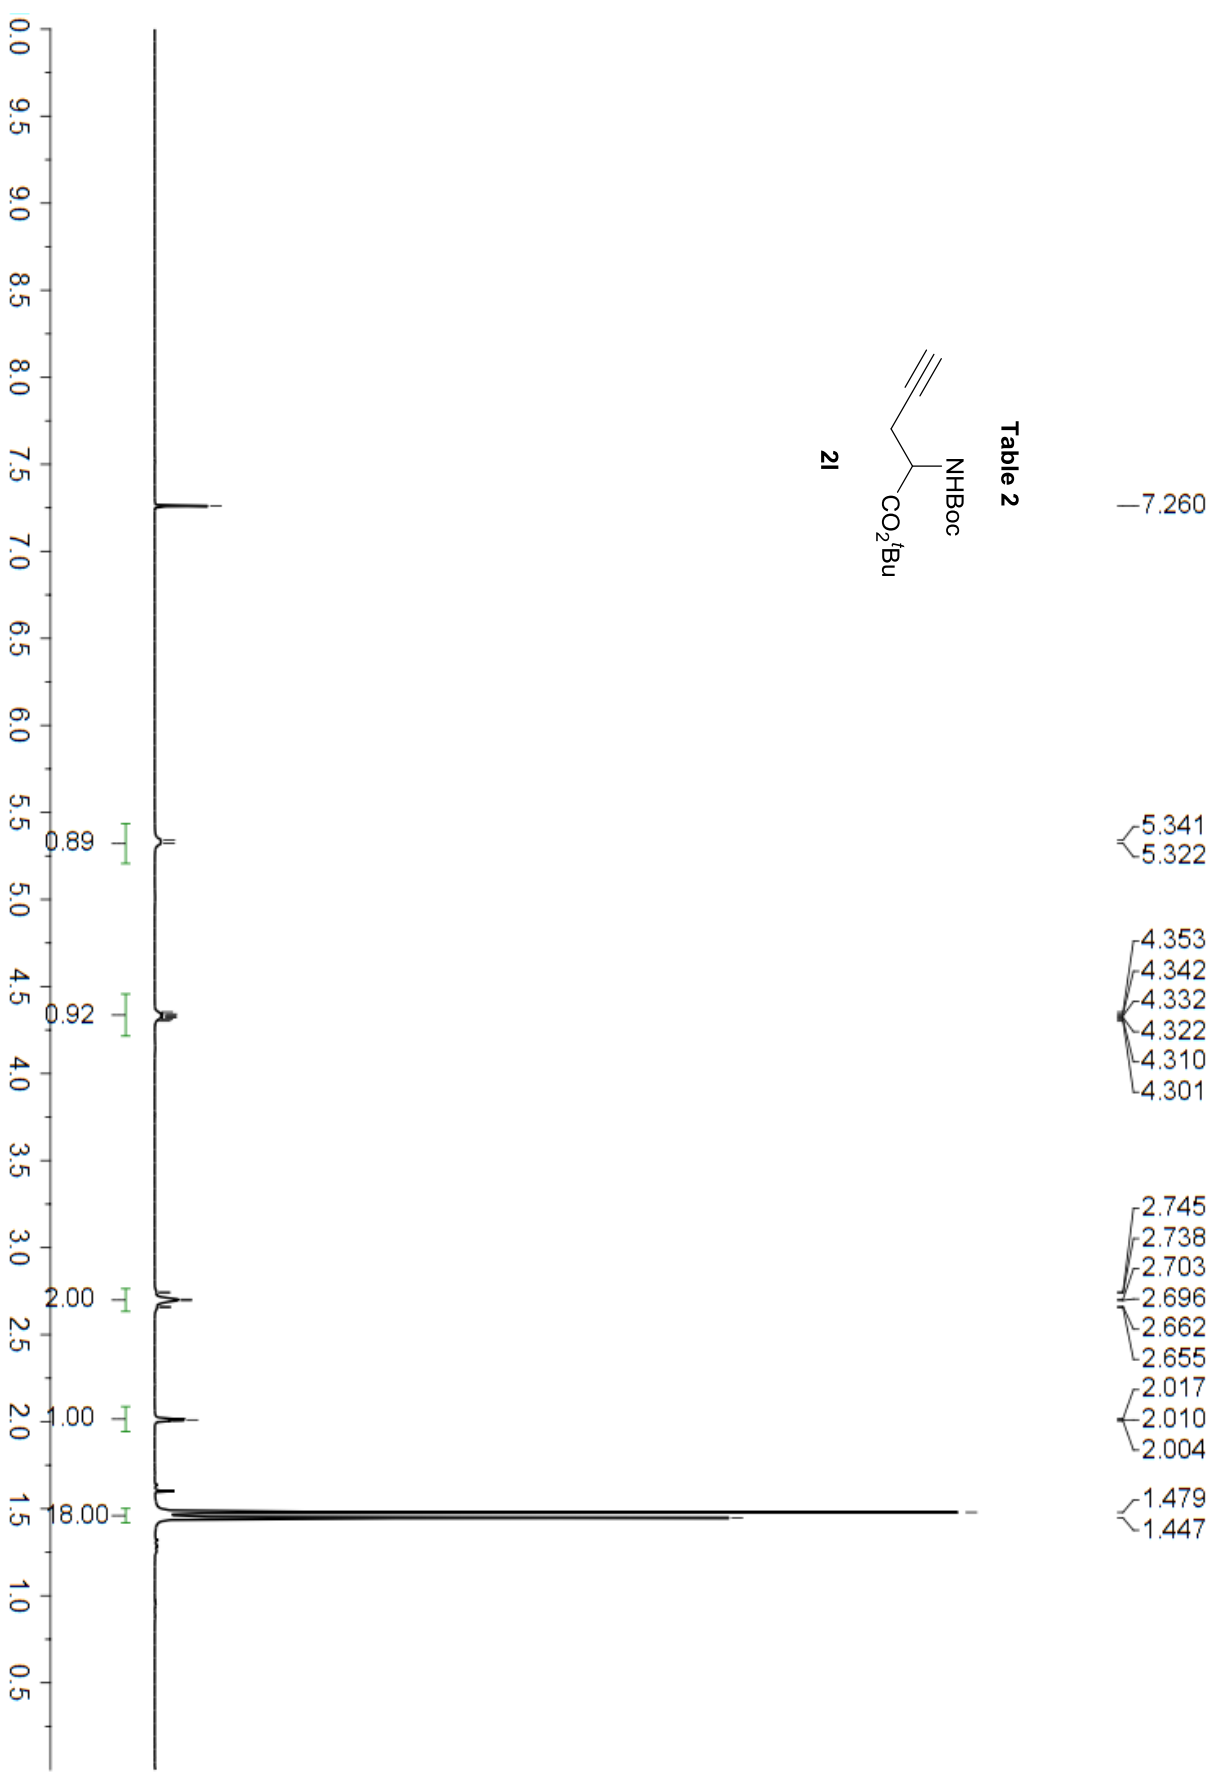

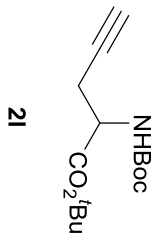

**Table 2**

|                                                                                                                                                          |         |
|----------------------------------------------------------------------------------------------------------------------------------------------------------|---------|
| —                                                                                                                                                        | 169.604 |
| —                                                                                                                                                        | 155.095 |
| <ul style="list-style-type: none"> <li>82.434</li> <li>79.881</li> <li>78.838</li> <li>77.317</li> <li>77.000</li> <li>76.682</li> <li>71.219</li> </ul> |         |
| —                                                                                                                                                        | 52.231  |
| <ul style="list-style-type: none"> <li>28.284</li> <li>27.928</li> <li>23.025</li> </ul>                                                                 |         |

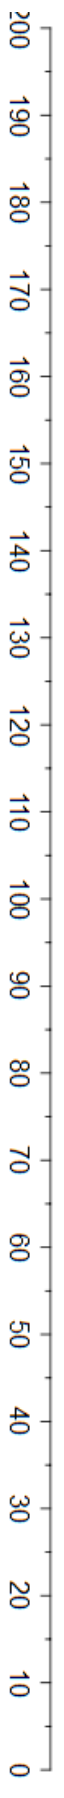

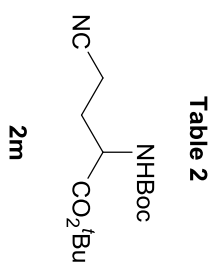

- 7.260
- 5.155
- 4.222
- 4.211
- 2.455
- 2.438
- 2.432
- 2.420
- 2.415
- 2.404
- 2.398
- 2.382
- 2.355
- 1.978
- 1.963
- 1.956
- 1.944
- 1.937
- 1.444

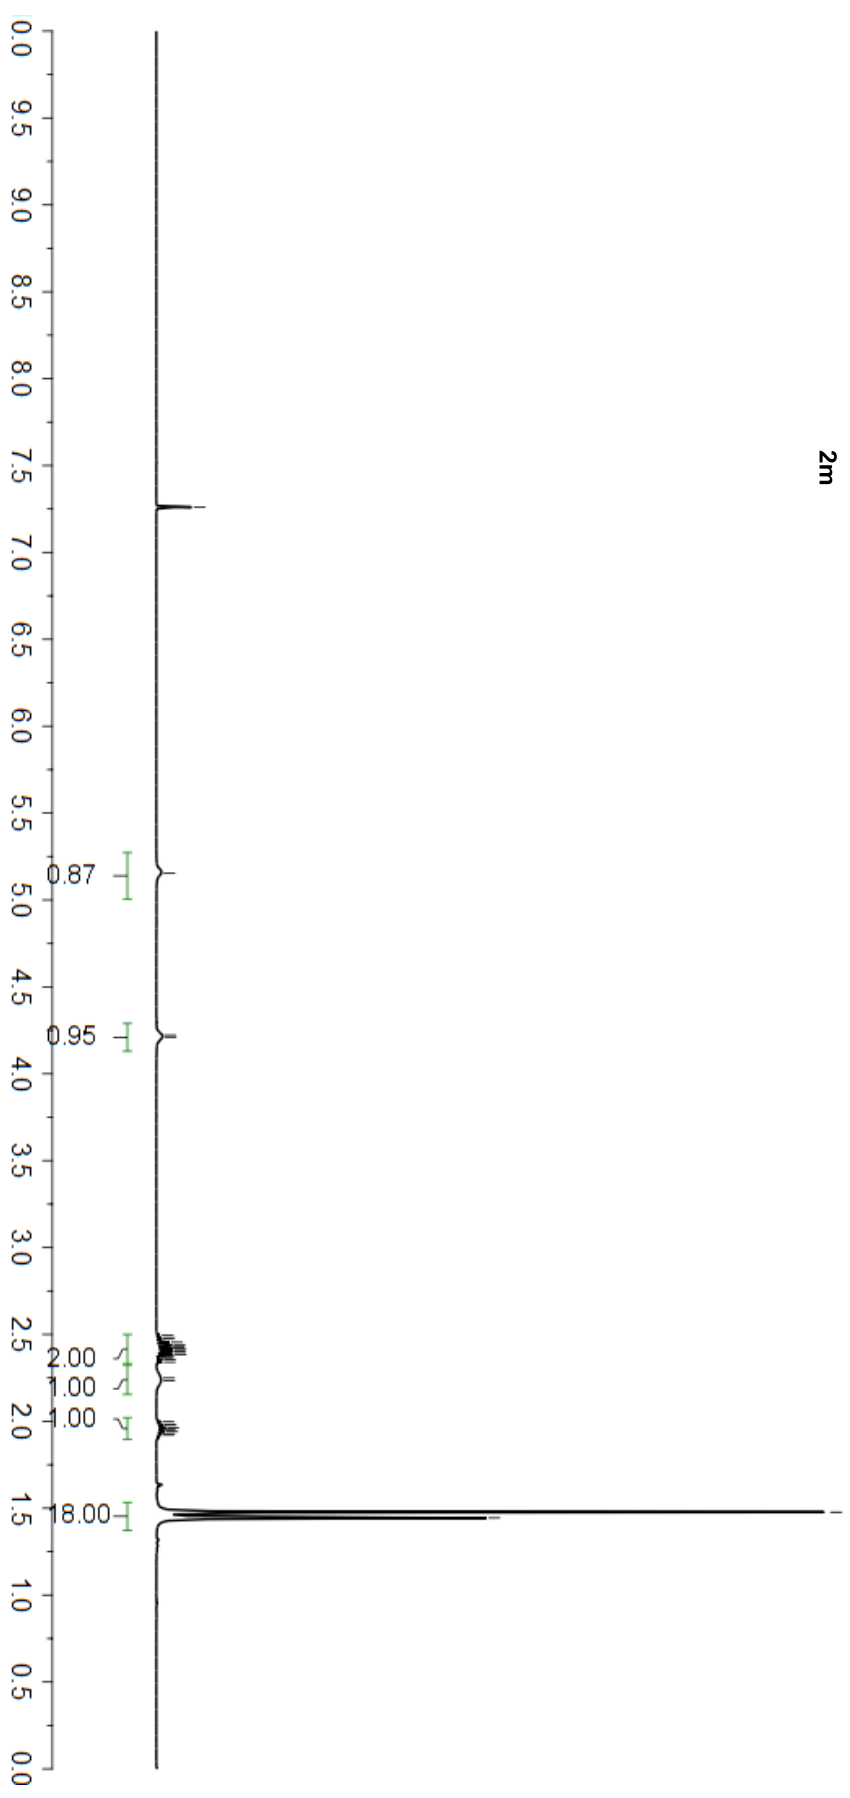

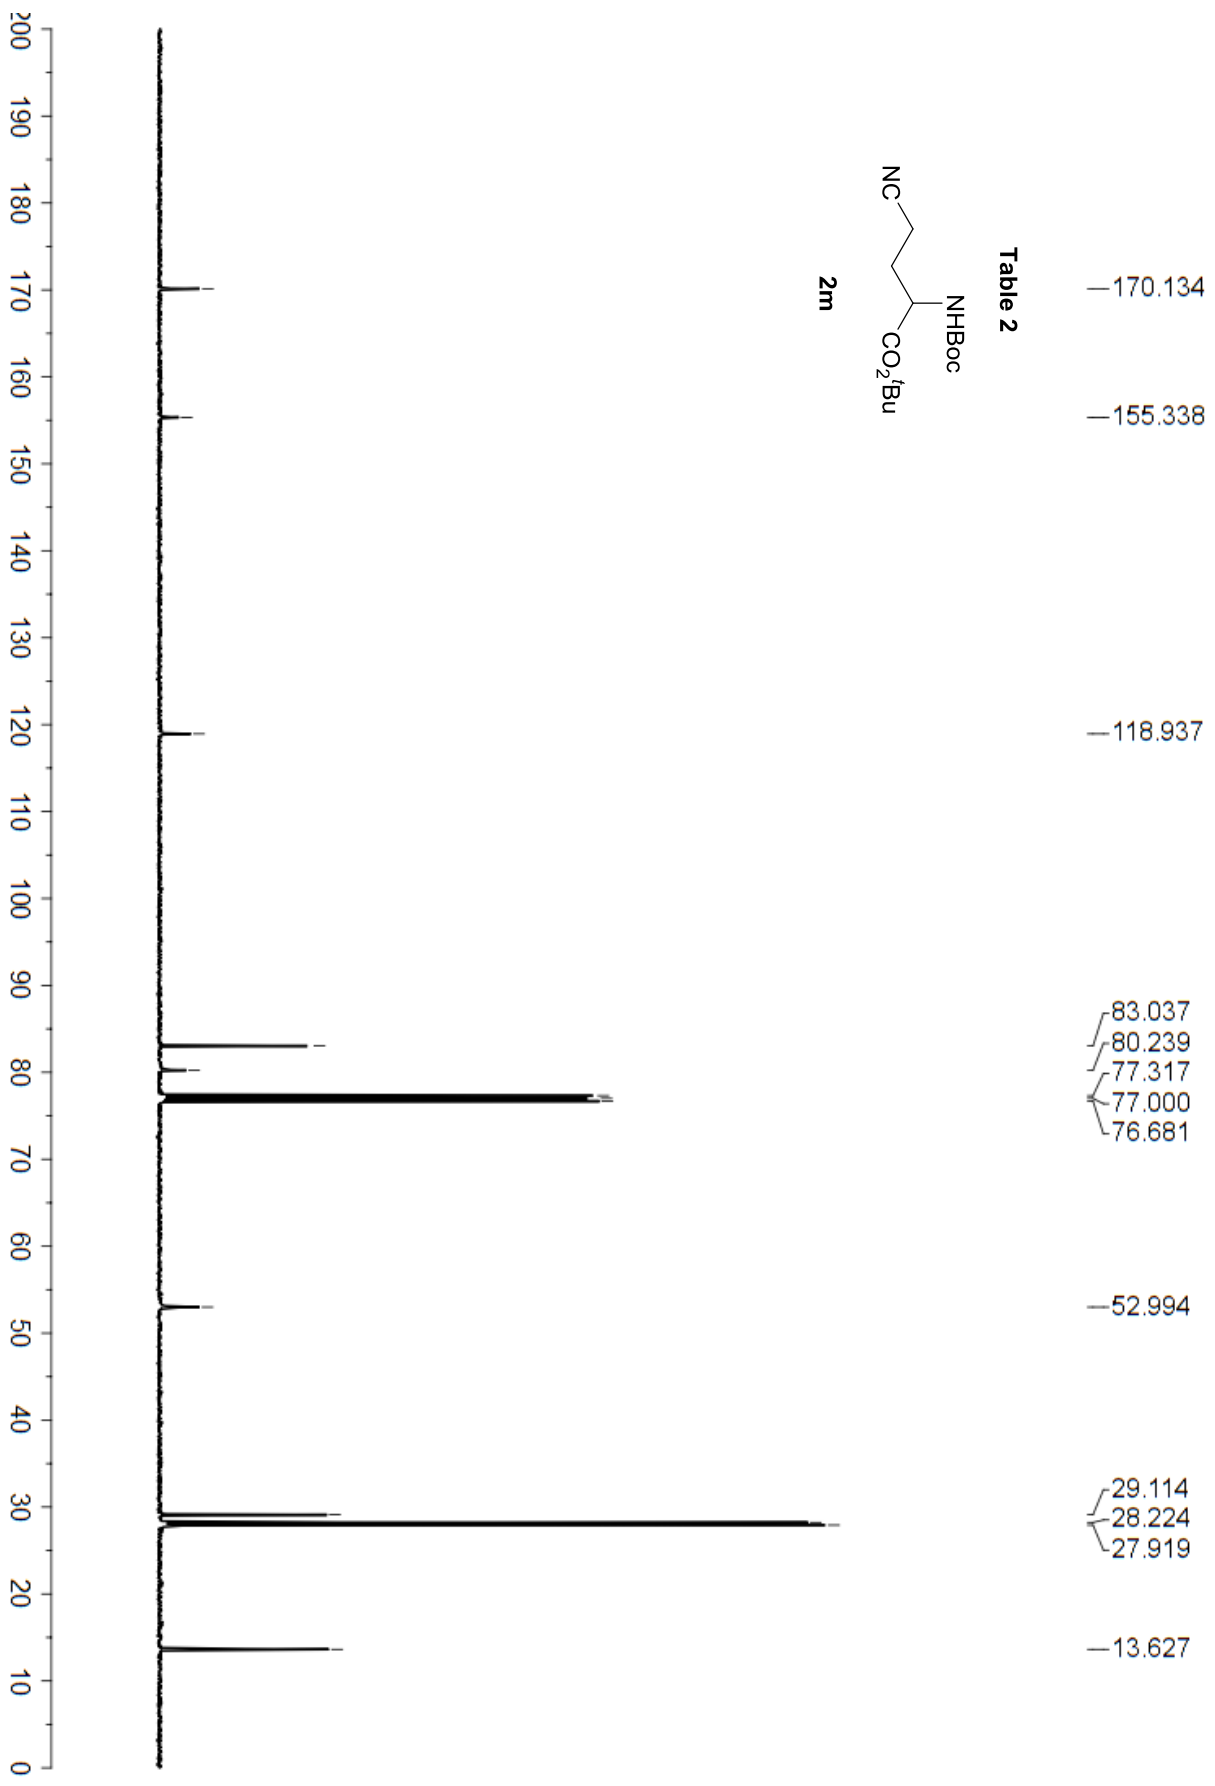

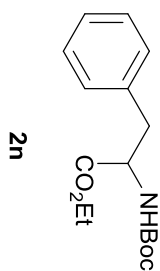

Table 2

|        |
|--------|
| 7.282  |
| 7.260  |
| 7.232  |
| 7.142  |
| 7.126  |
| —4.969 |
| 4.561  |
| 4.548  |
| 4.177  |
| 4.160  |
| 4.143  |
| 4.126  |
| —3.077 |
| 1.412  |
| 1.237  |
| 1.220  |
| 1.203  |

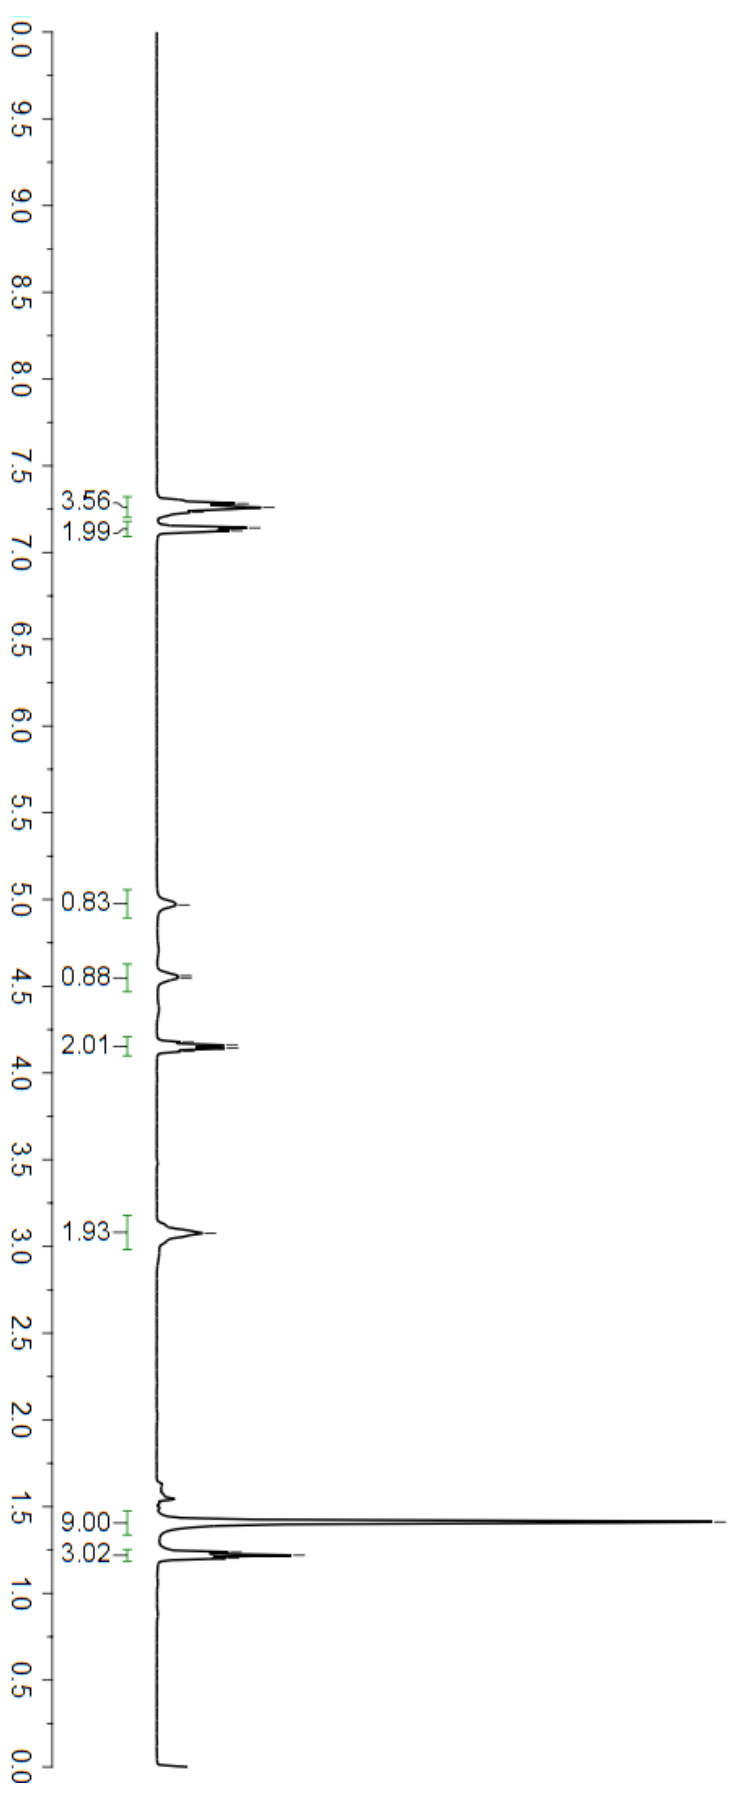

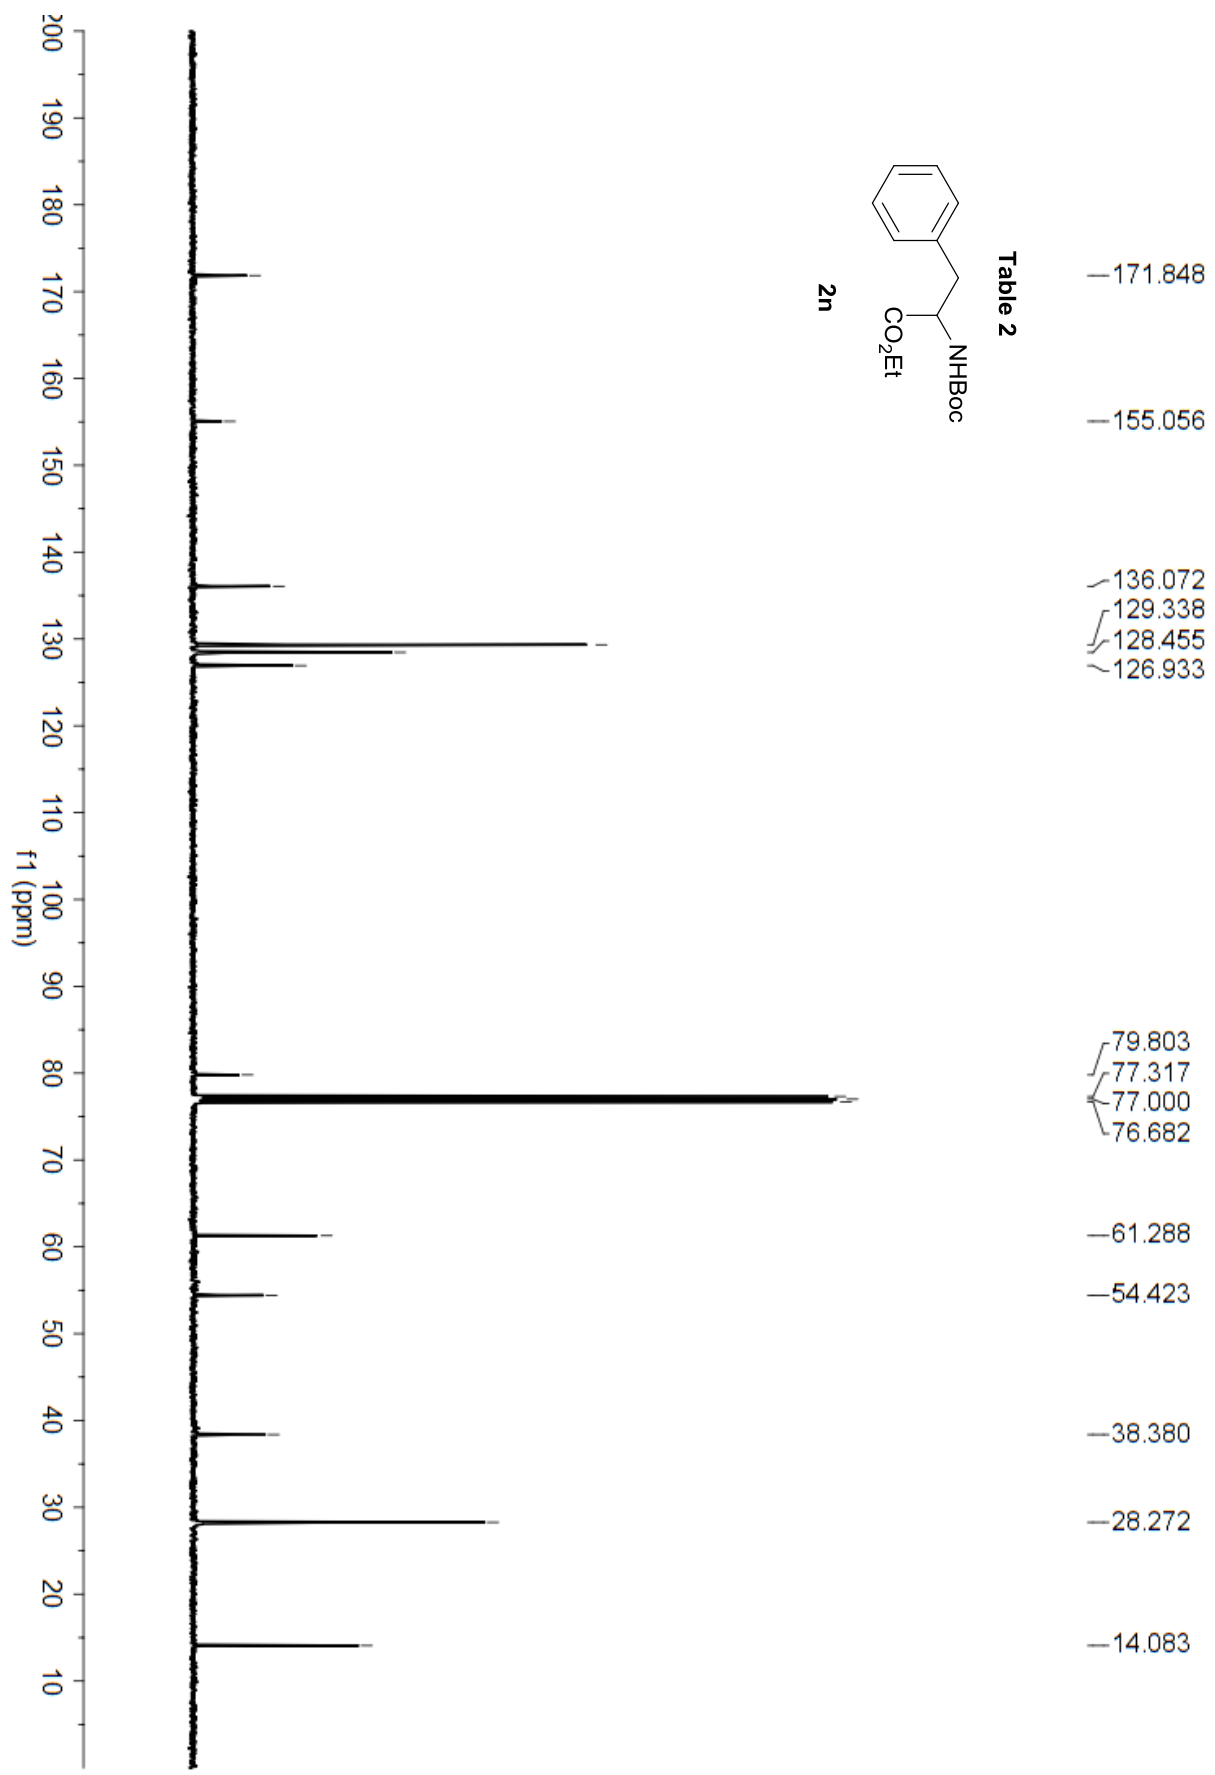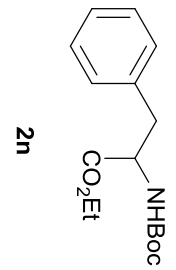

**Table 2**

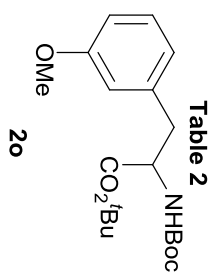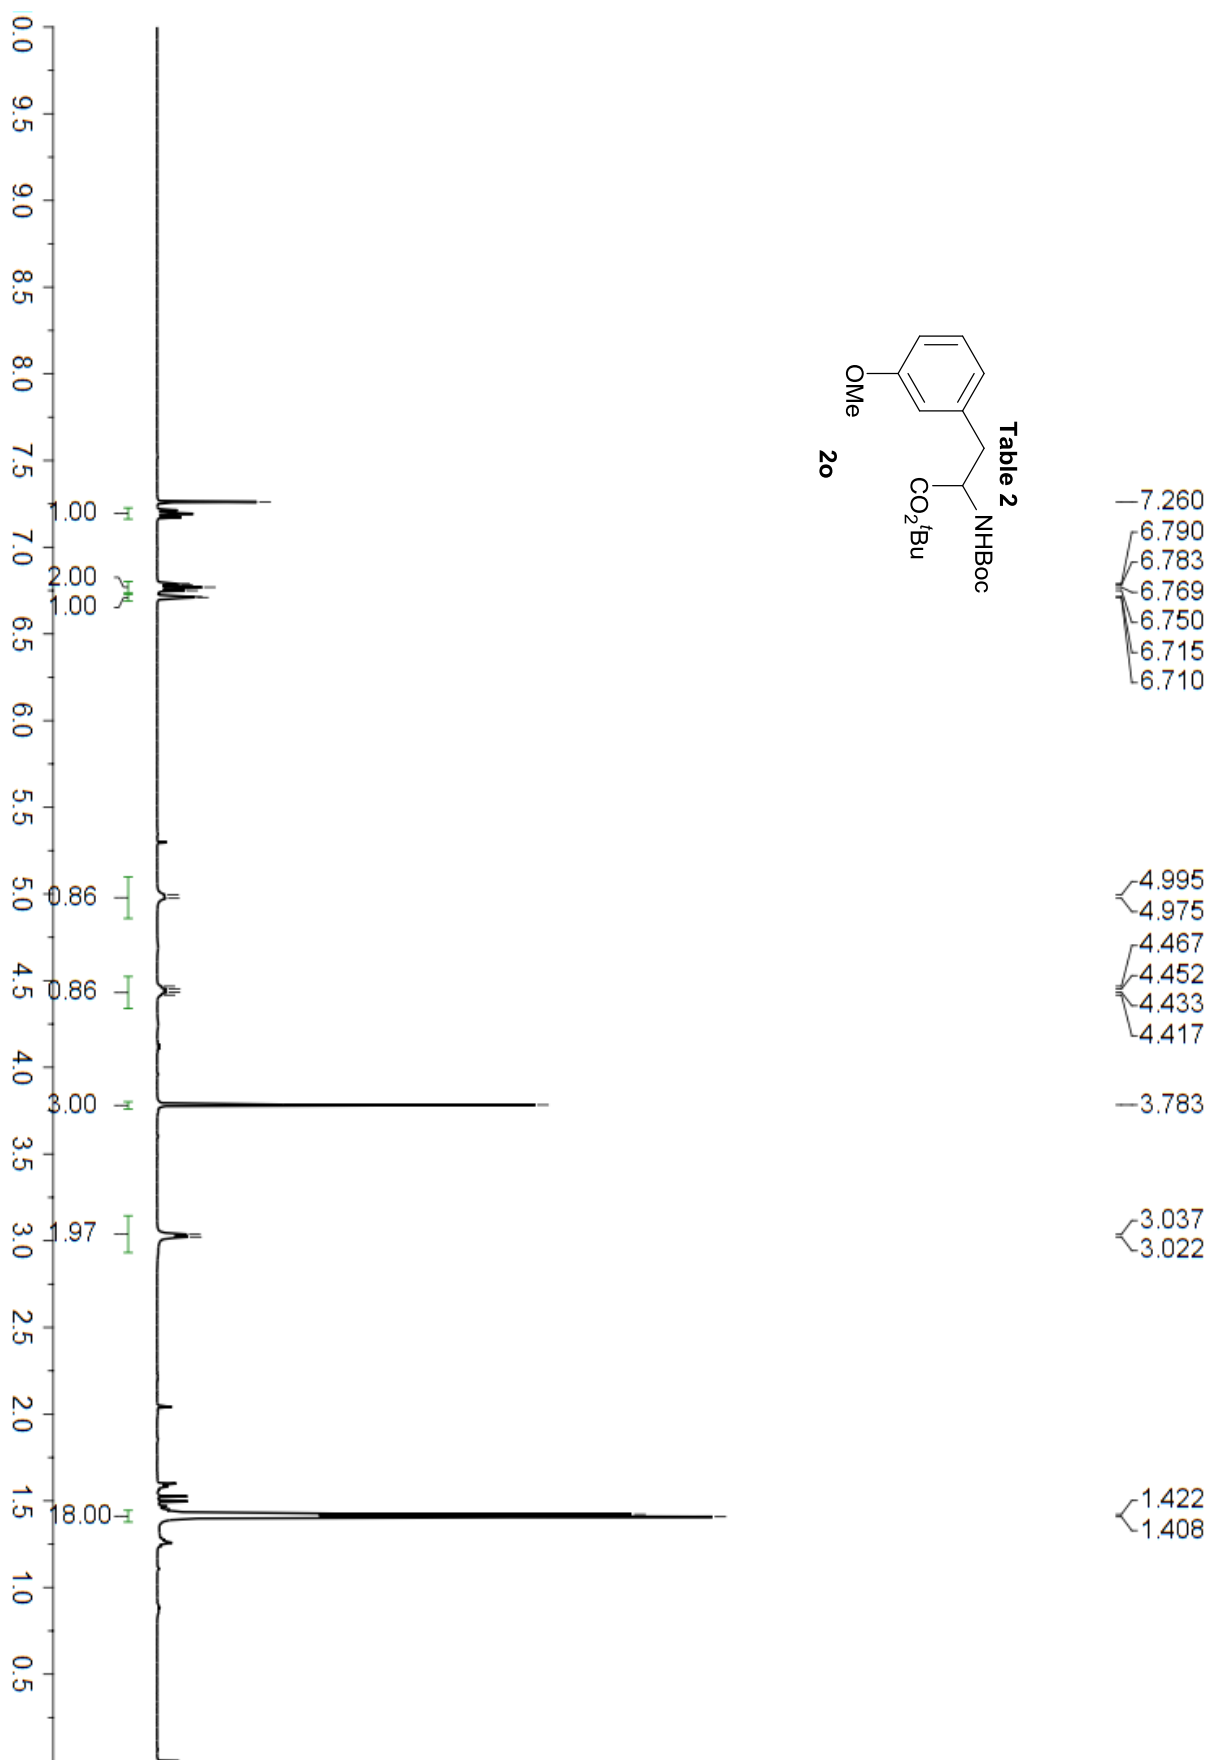



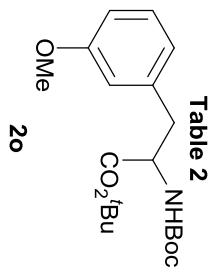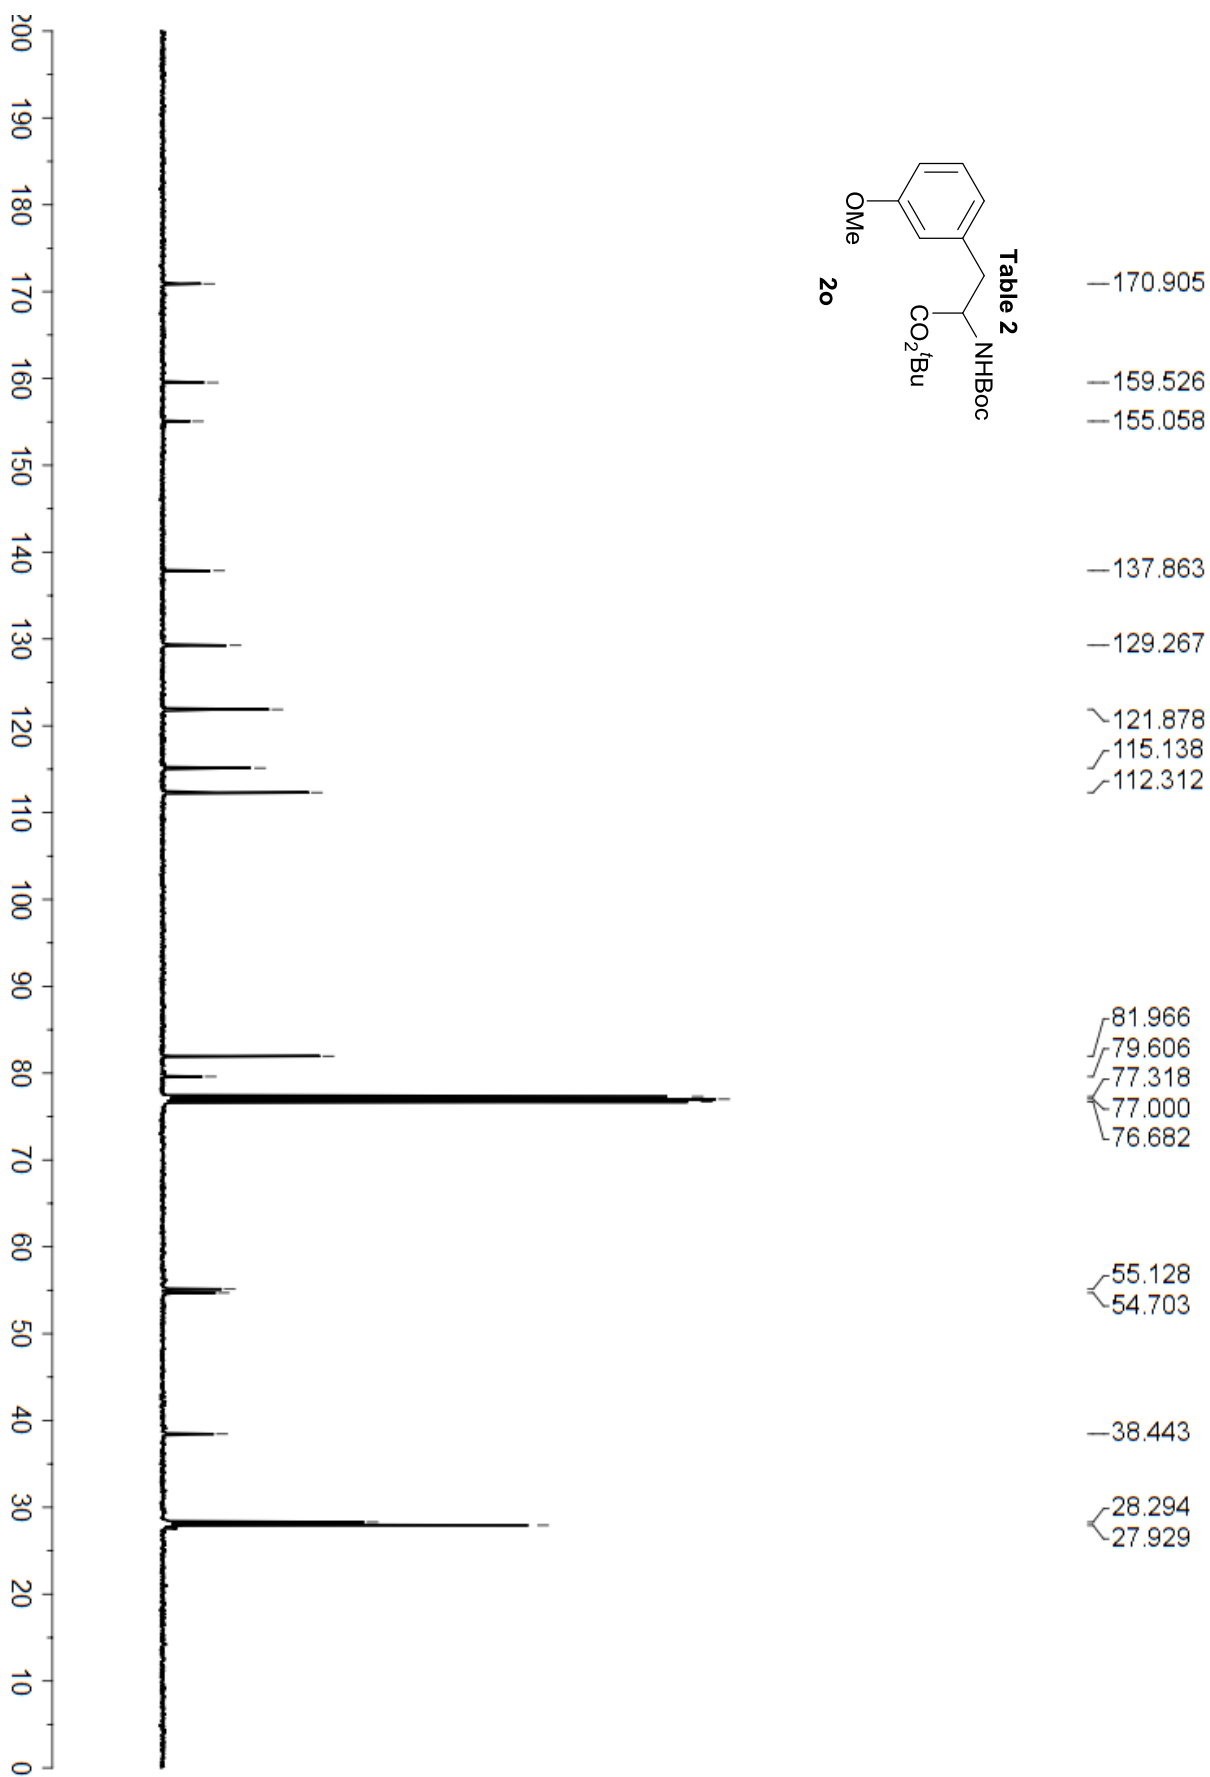

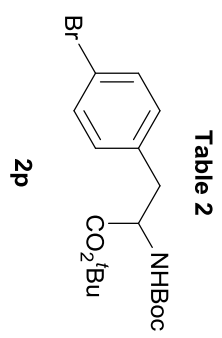

7.415  
7.394  
7.260  
7.056  
7.035

4.999  
4.980  
4.446  
4.430  
4.412  
4.396

3.027  
3.012  
3.002  
2.987  
2.967

1.418  
1.406

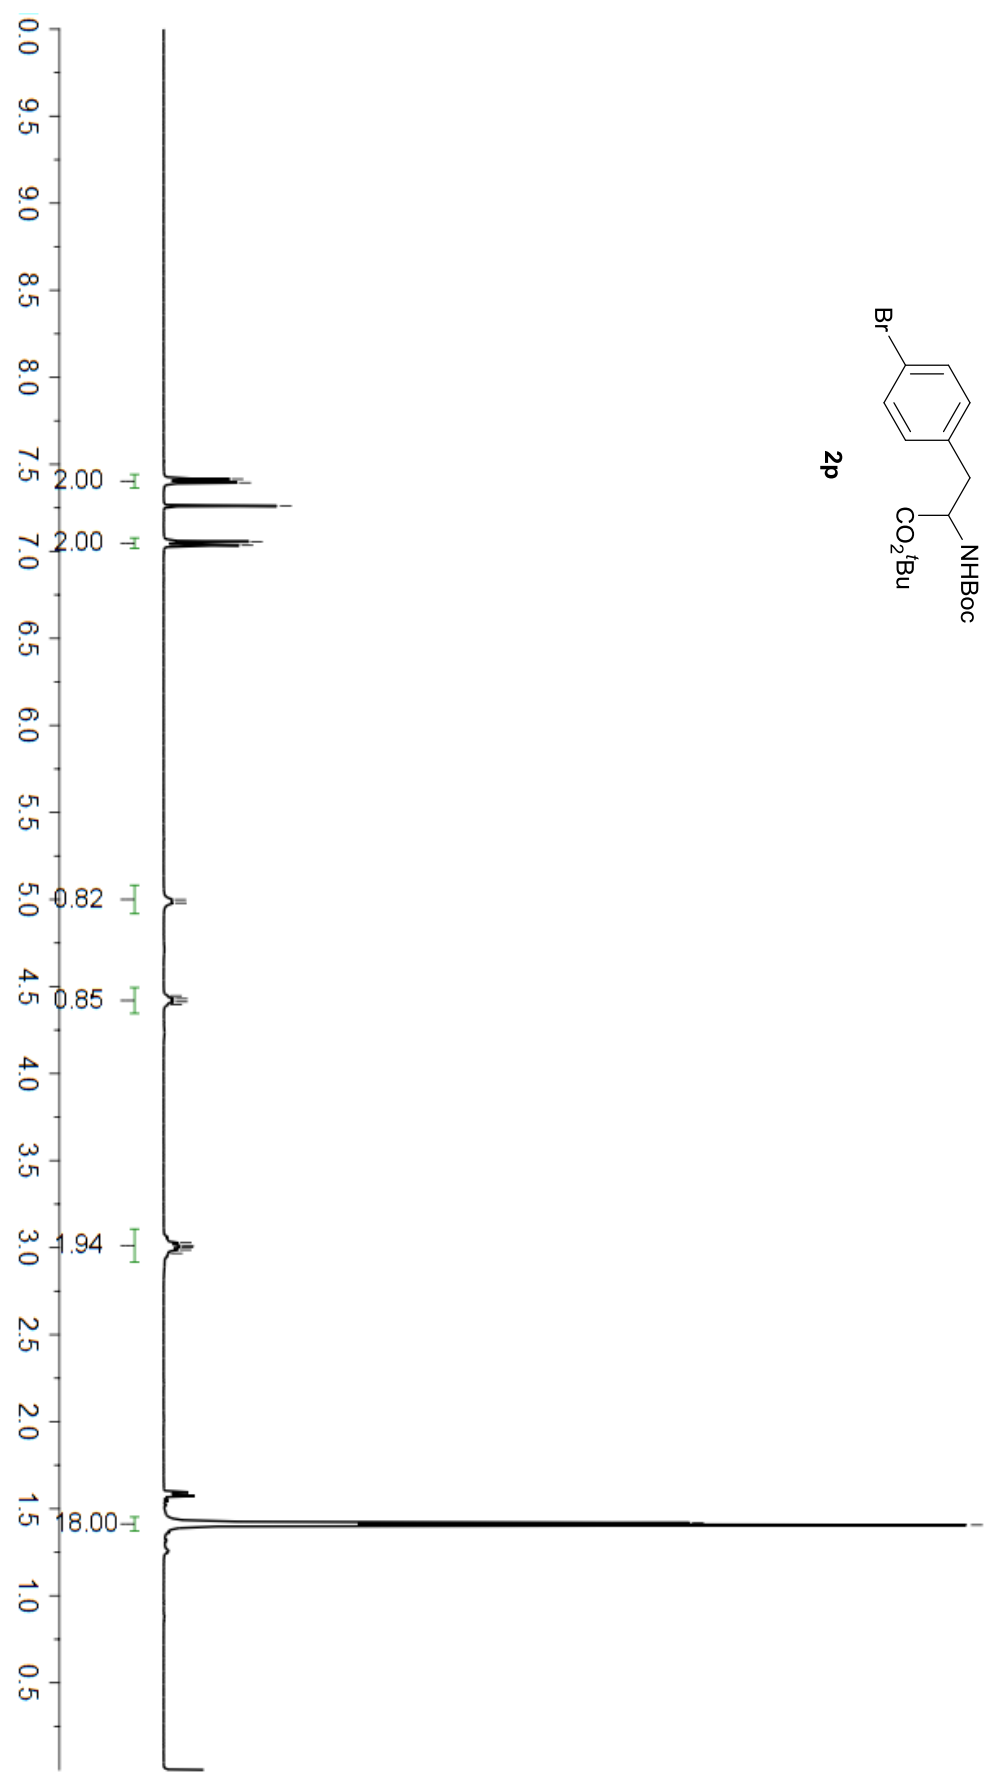

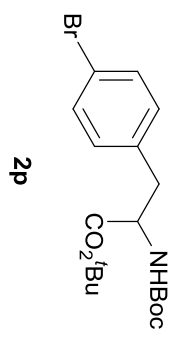

**Table 2**

|   |         |
|---|---------|
| — | 170.633 |
| — | 154.990 |
| { | 135.458 |
| { | 131.367 |
| { | 131.241 |
| — | 120.762 |
| { | 82.283  |
| { | 79.768  |
| { | 77.317  |
| { | 77.000  |
| { | 76.682  |
| — | 54.599  |
| — | 37.931  |
| { | 28.276  |
| { | 27.943  |

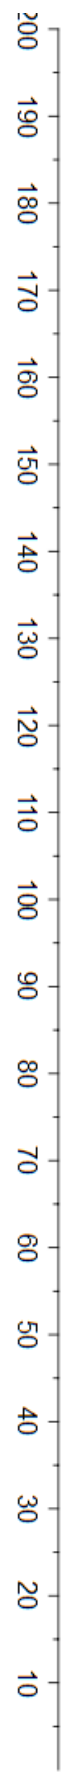

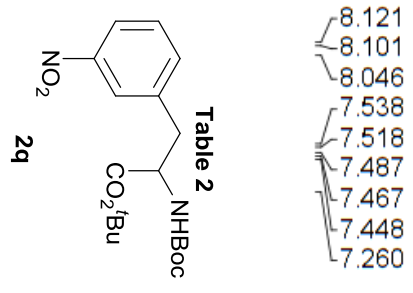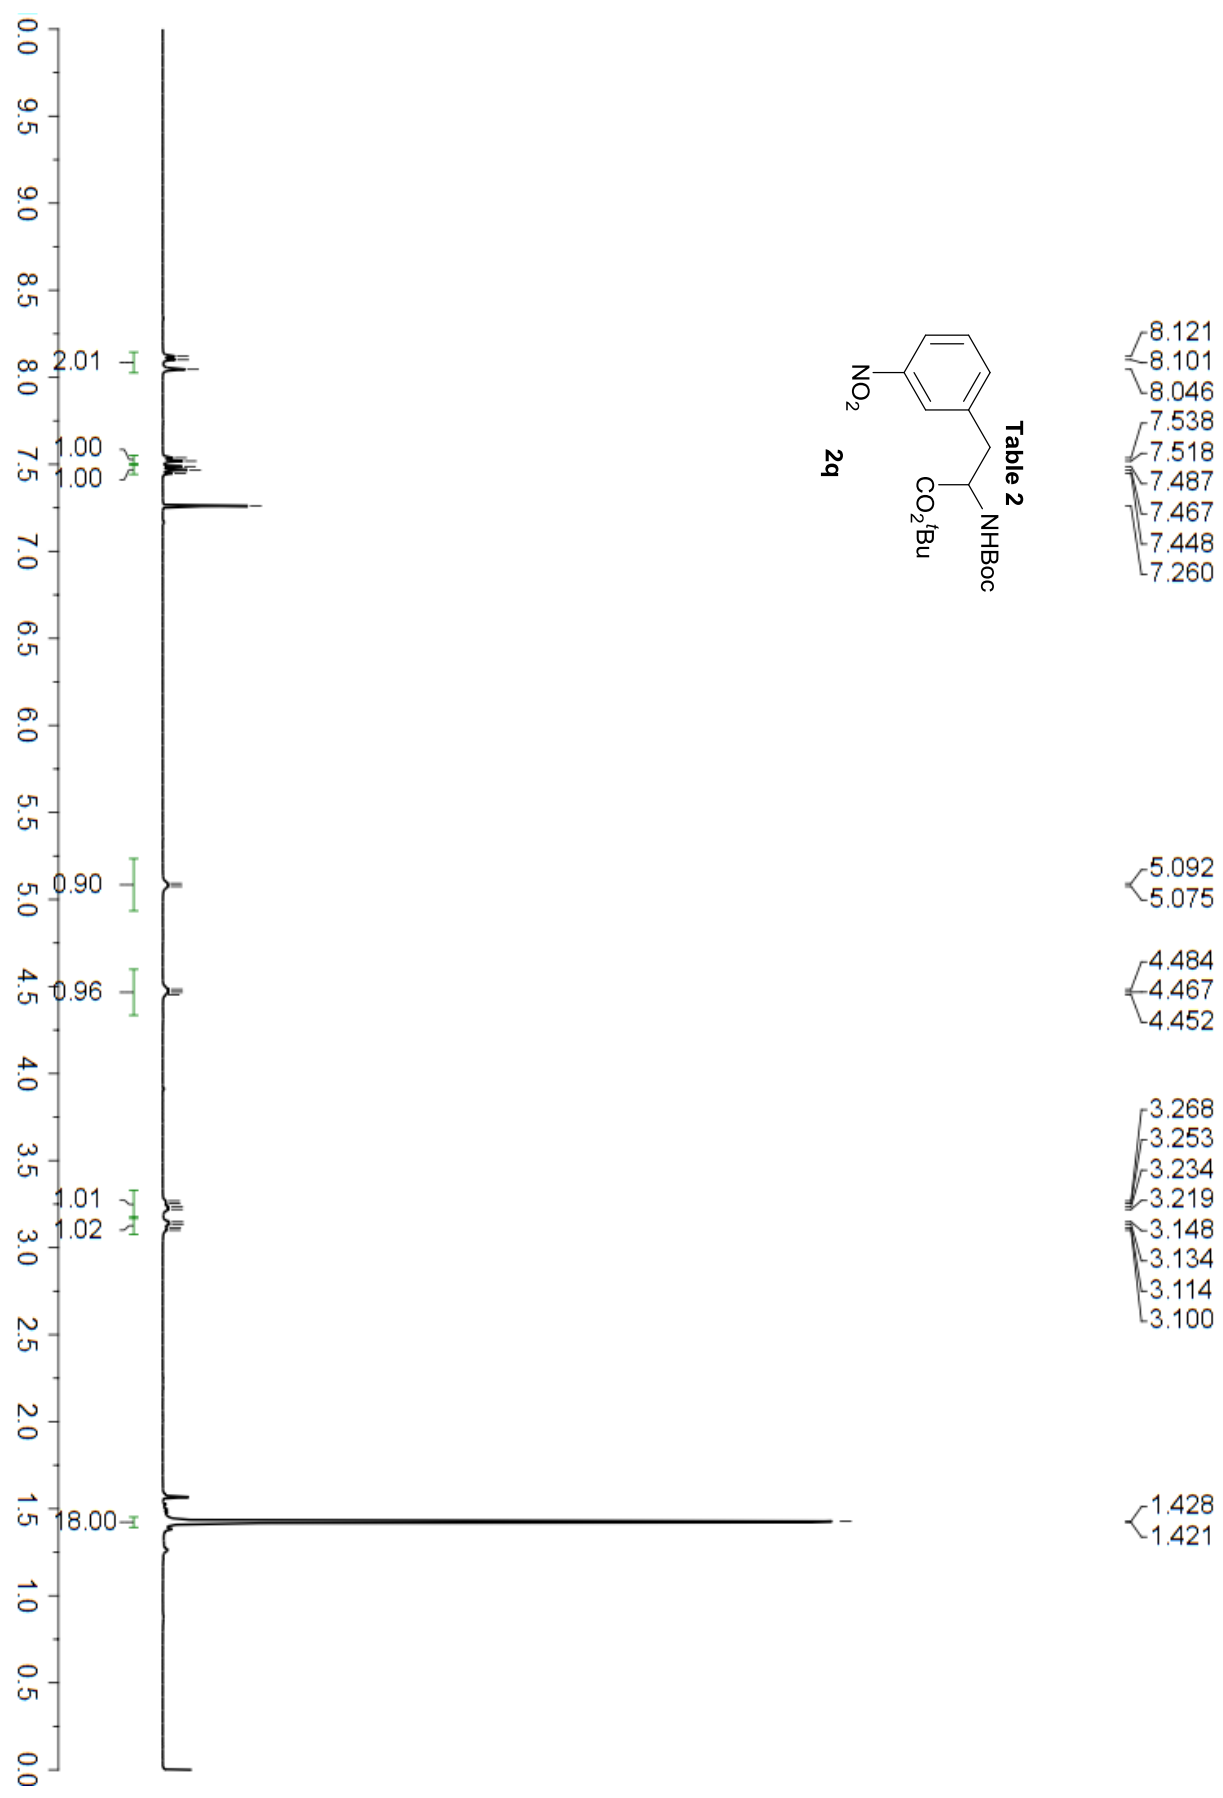

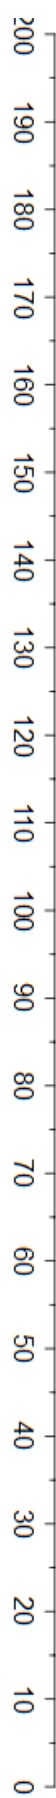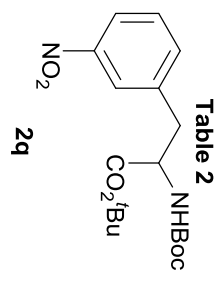

- 170.173
- 154.921
- 148.127
- ~ 138.690
- ~ 135.816
- ~ 129.185
- ~ 124.512
- ~ 121.971
- ~ 82.855
- ~ 80.023
- ~ 77.318
- ~ 77.000
- ~ 76.683
- 54.578
- 38.152
- ~ 28.248
- ~ 27.959

7.821  
7.812  
7.804  
7.797  
7.787  
7.776  
7.767  
7.753  
7.614  
7.479  
7.467  
7.462  
7.460  
7.451  
7.442  
7.436  
7.423  
7.338  
7.334  
7.317  
7.313  
7.260

Table 2

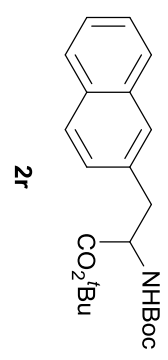

5.021  
5.002  
4.563  
4.548  
4.529  
4.514

3.239  
3.224

1.413  
1.390

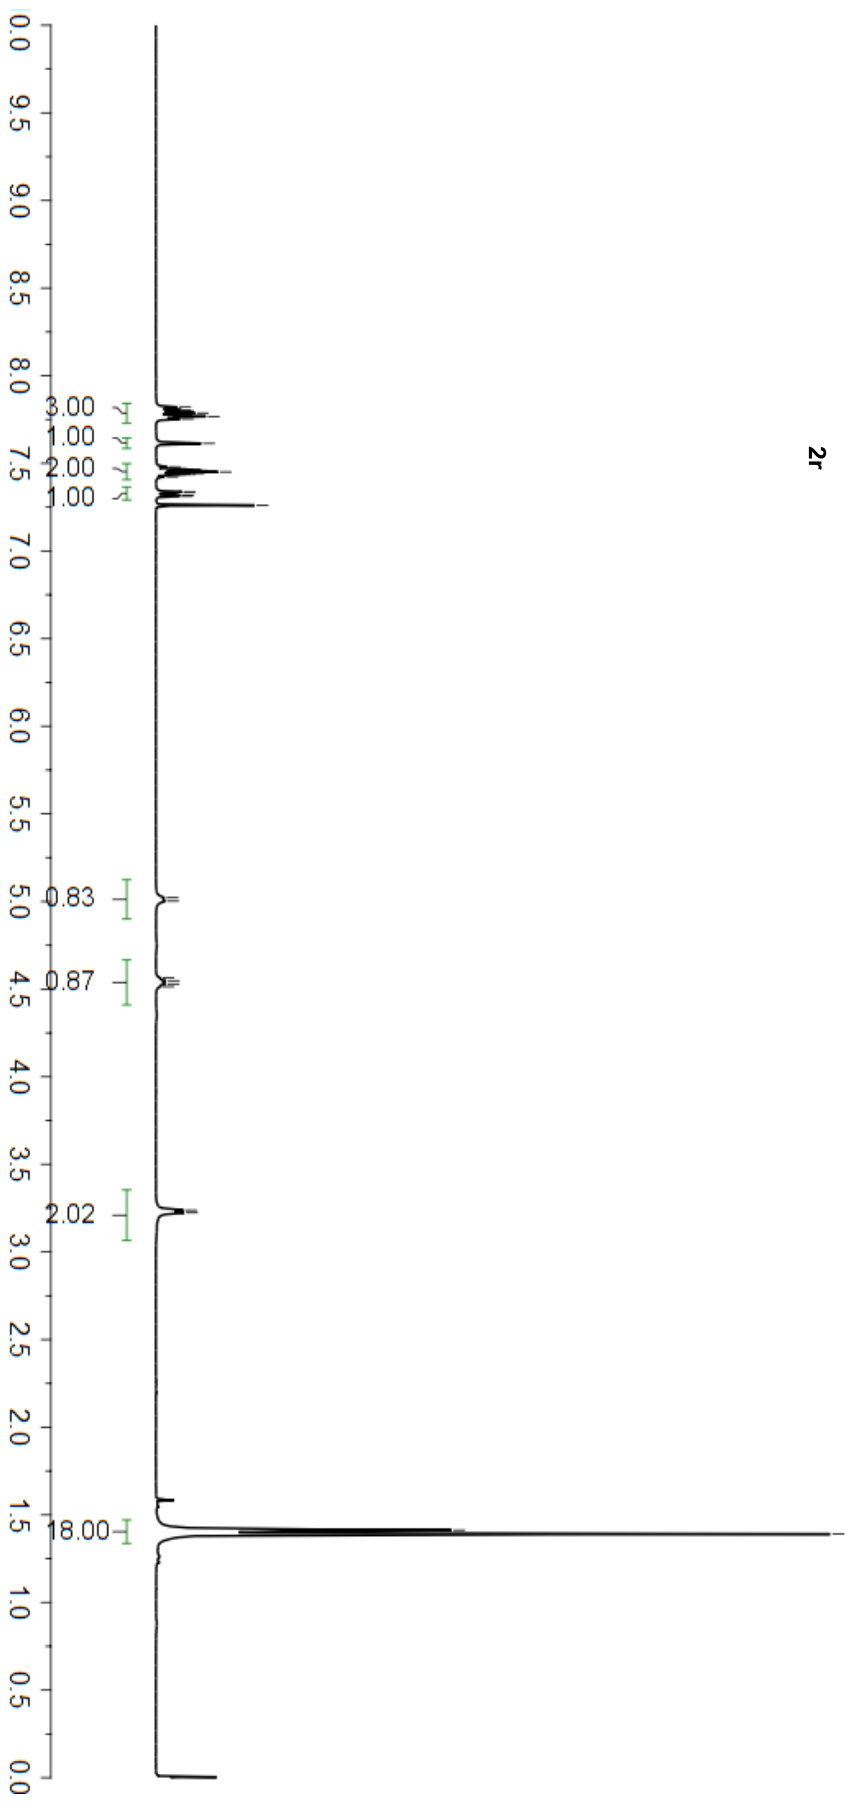

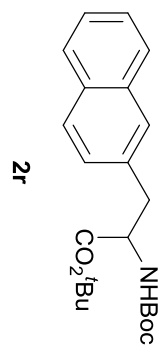

**Table 2**

|         |
|---------|
| 170.946 |
| 155.098 |
| 133.984 |
| 133.352 |
| 132.404 |
| 128.177 |
| 127.935 |
| 127.715 |
| 127.619 |
| 127.495 |
| 126.016 |
| 125.547 |
| 82.059  |
| 79.653  |
| 77.318  |
| 77.000  |
| 76.683  |
| 54.872  |
| 38.613  |
| 28.292  |
| 27.930  |

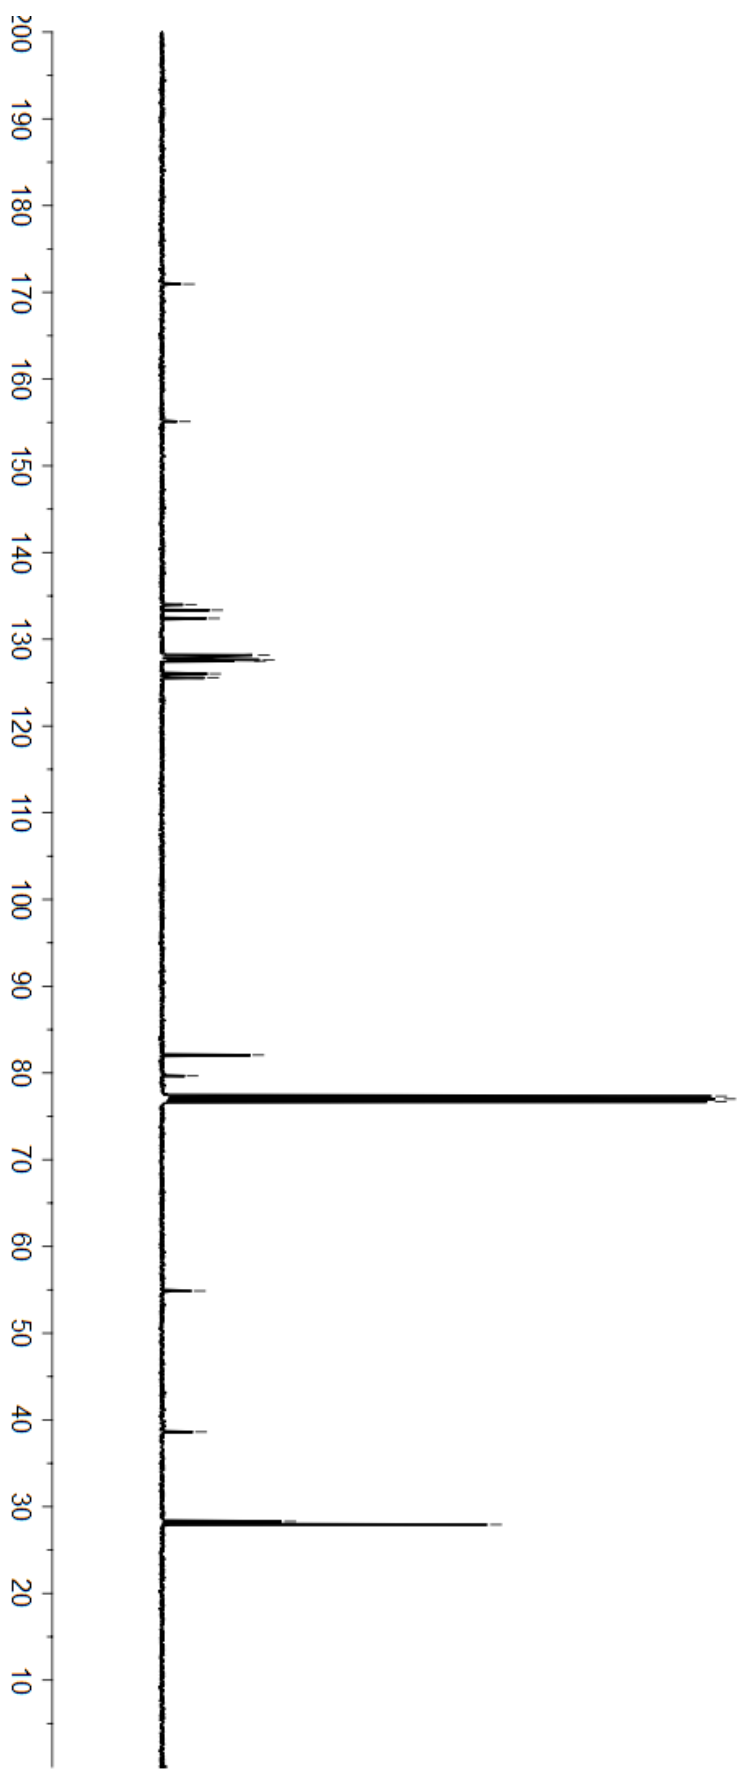

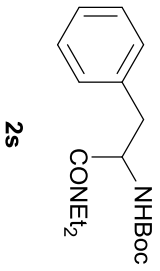

**Table 2**

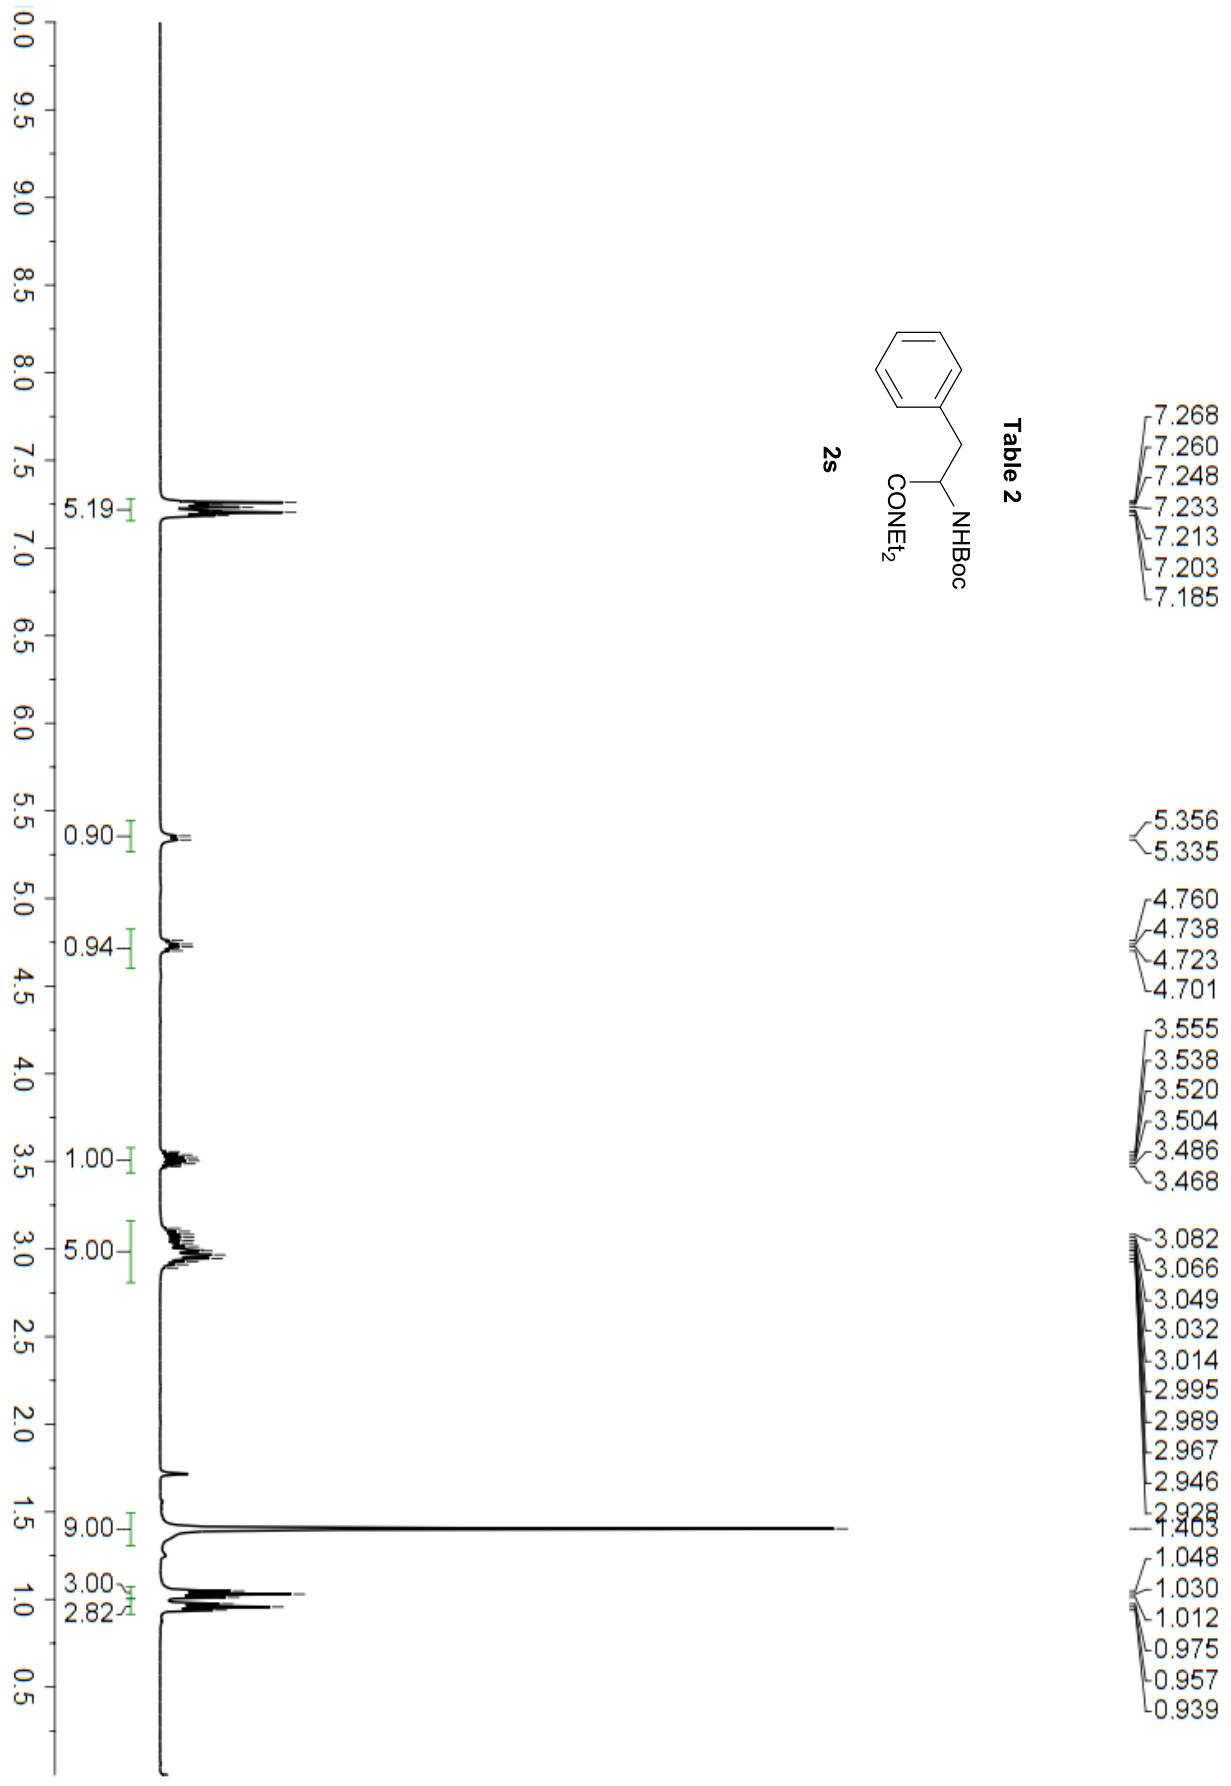



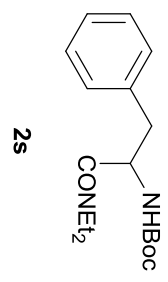

**Table 2**

- 170.817
- 154.973
- 136.617
- 129.553
- 128.329
- 126.766
- 79.536
- 77.318
- 77.000
- 76.683
- 51.350
- 41.591
- 40.524
- 40.361
- 28.308
- 14.133
- 12.755

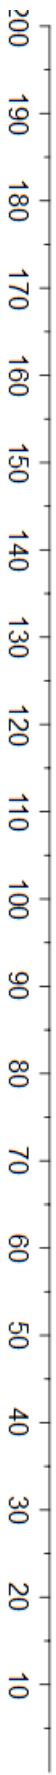

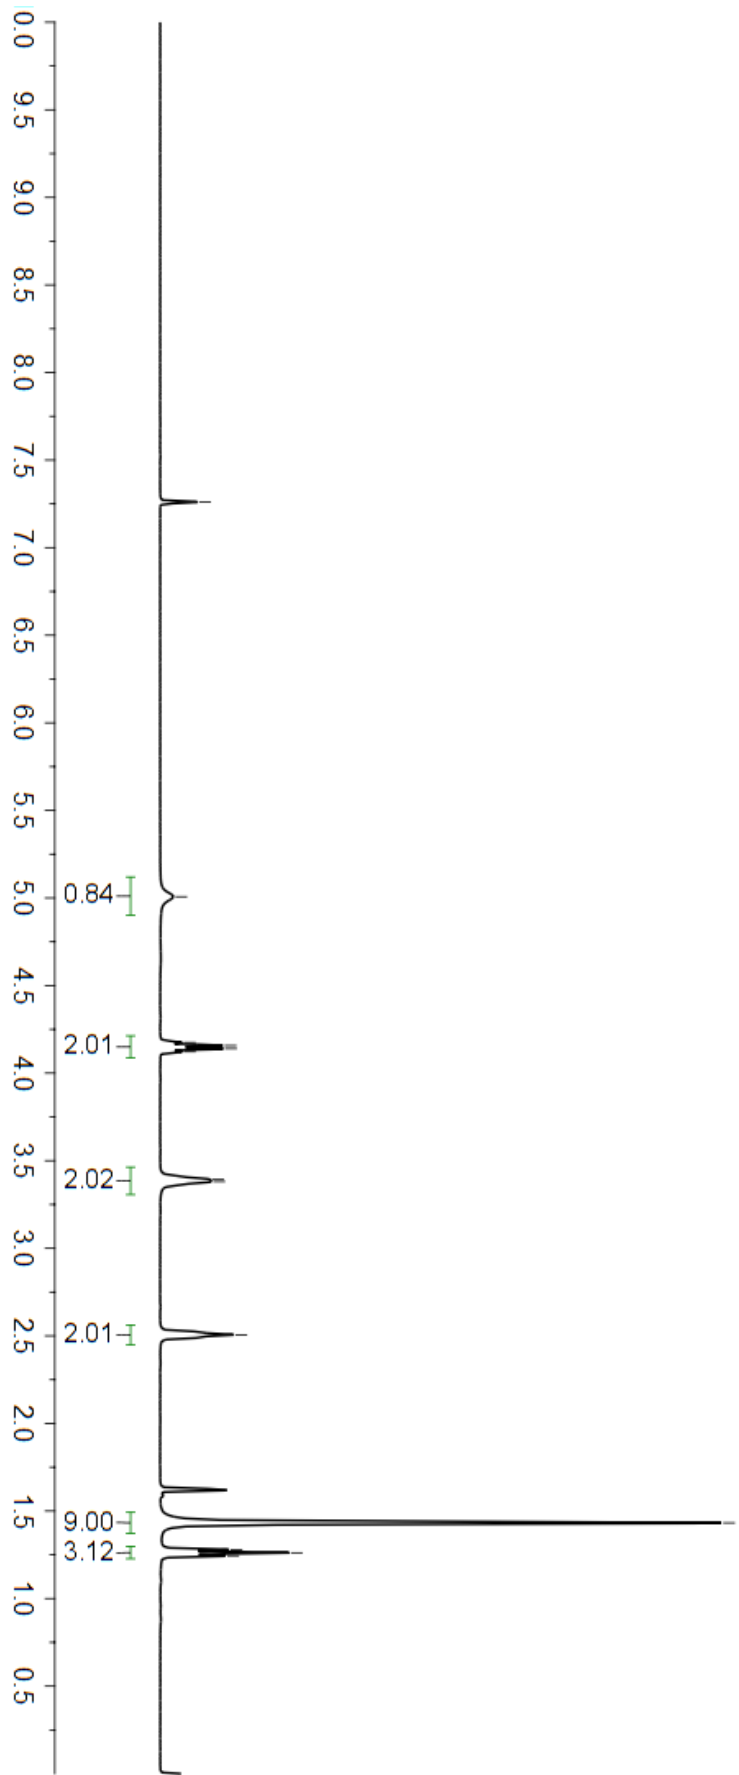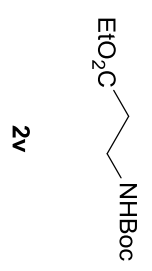

**Table 2**

|   |       |
|---|-------|
| — | 7.260 |
| — | 5.007 |
| { | 4.174 |
| { | 4.157 |
| { | 4.140 |
| { | 4.122 |
| { | 3.393 |
| { | 3.381 |
| — | 2.506 |
| { | 1.432 |
| { | 1.279 |
| { | 1.261 |
| { | 1.244 |

— 172.460

— 155.740

79.262  
77.318  
77.000  
76.683

— 60.572

36.046  
34.591  
28.330

— 14.134

Table 2

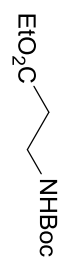

2v

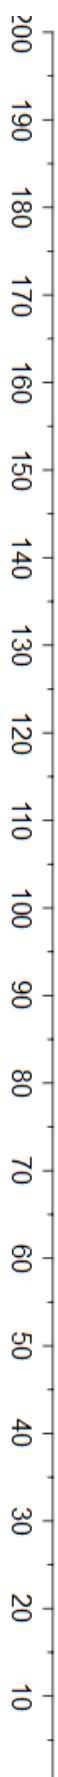

-7.260

-4.634

4.145  
4.128  
4.110  
4.092

3.174  
3.158  
3.142  
3.126

2.346  
2.328  
2.309

1.817  
1.799  
1.424  
1.260  
1.243  
1.225

Table 2

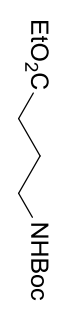

2w

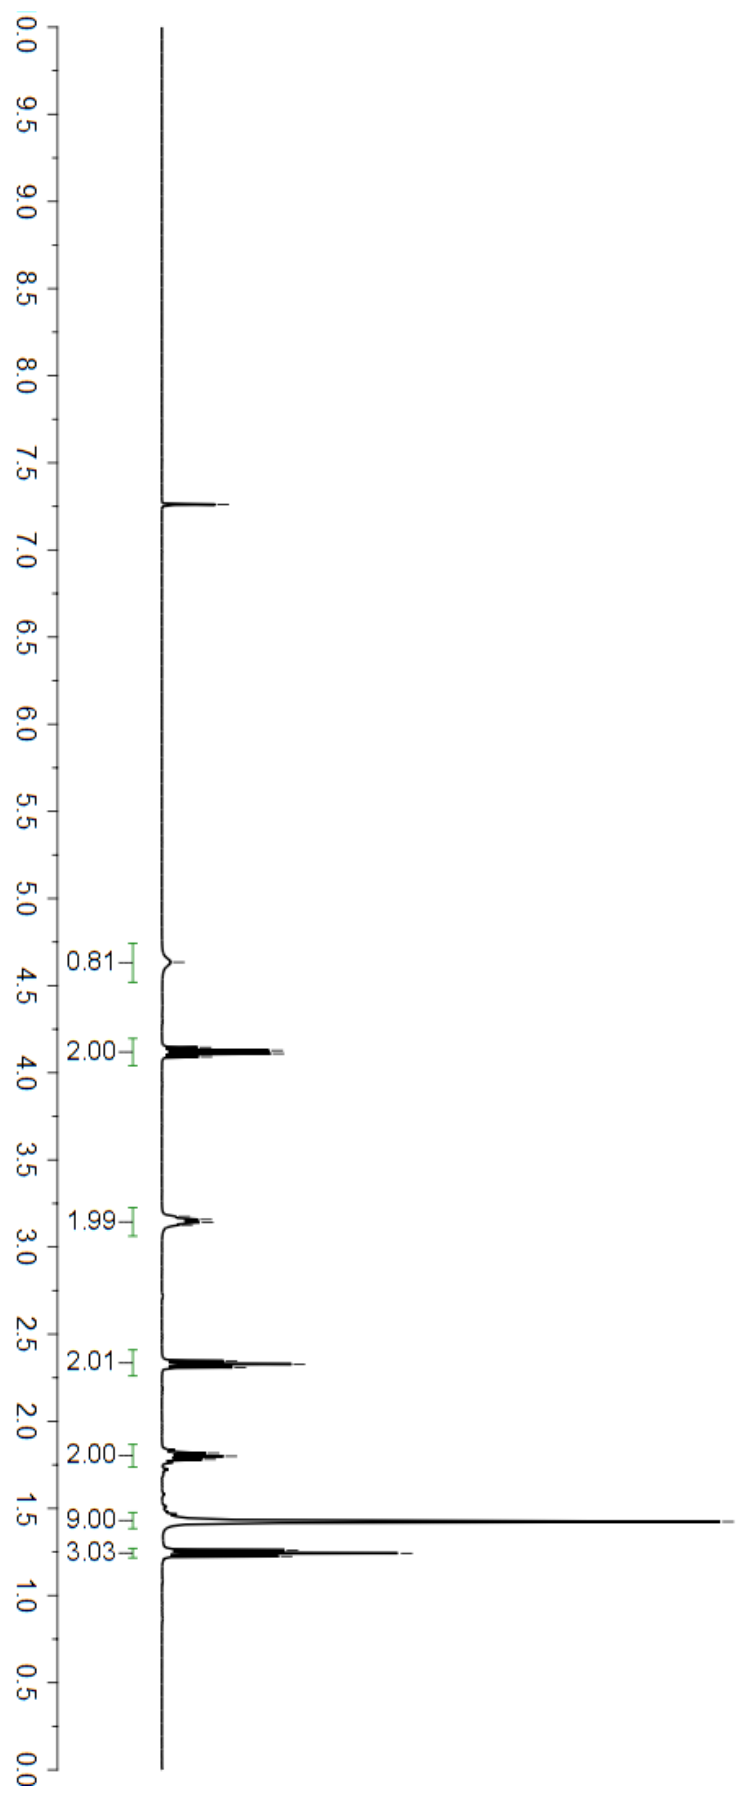

— 173.267

— 155.906

79.153  
77.317  
77.000  
76.682

— 60.415

— 39.919

31.579  
28.362  
25.251

— 14.177

Table 2

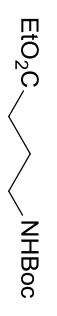

2w

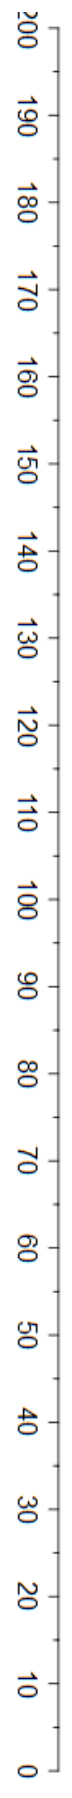

10.0 9.5 9.0 8.5 8.0 7.5 7.0 6.5 6.0 5.5 5.0 4.5 4.0 3.5 3.0 2.5 2.0 1.5 1.0 0.5 0.0

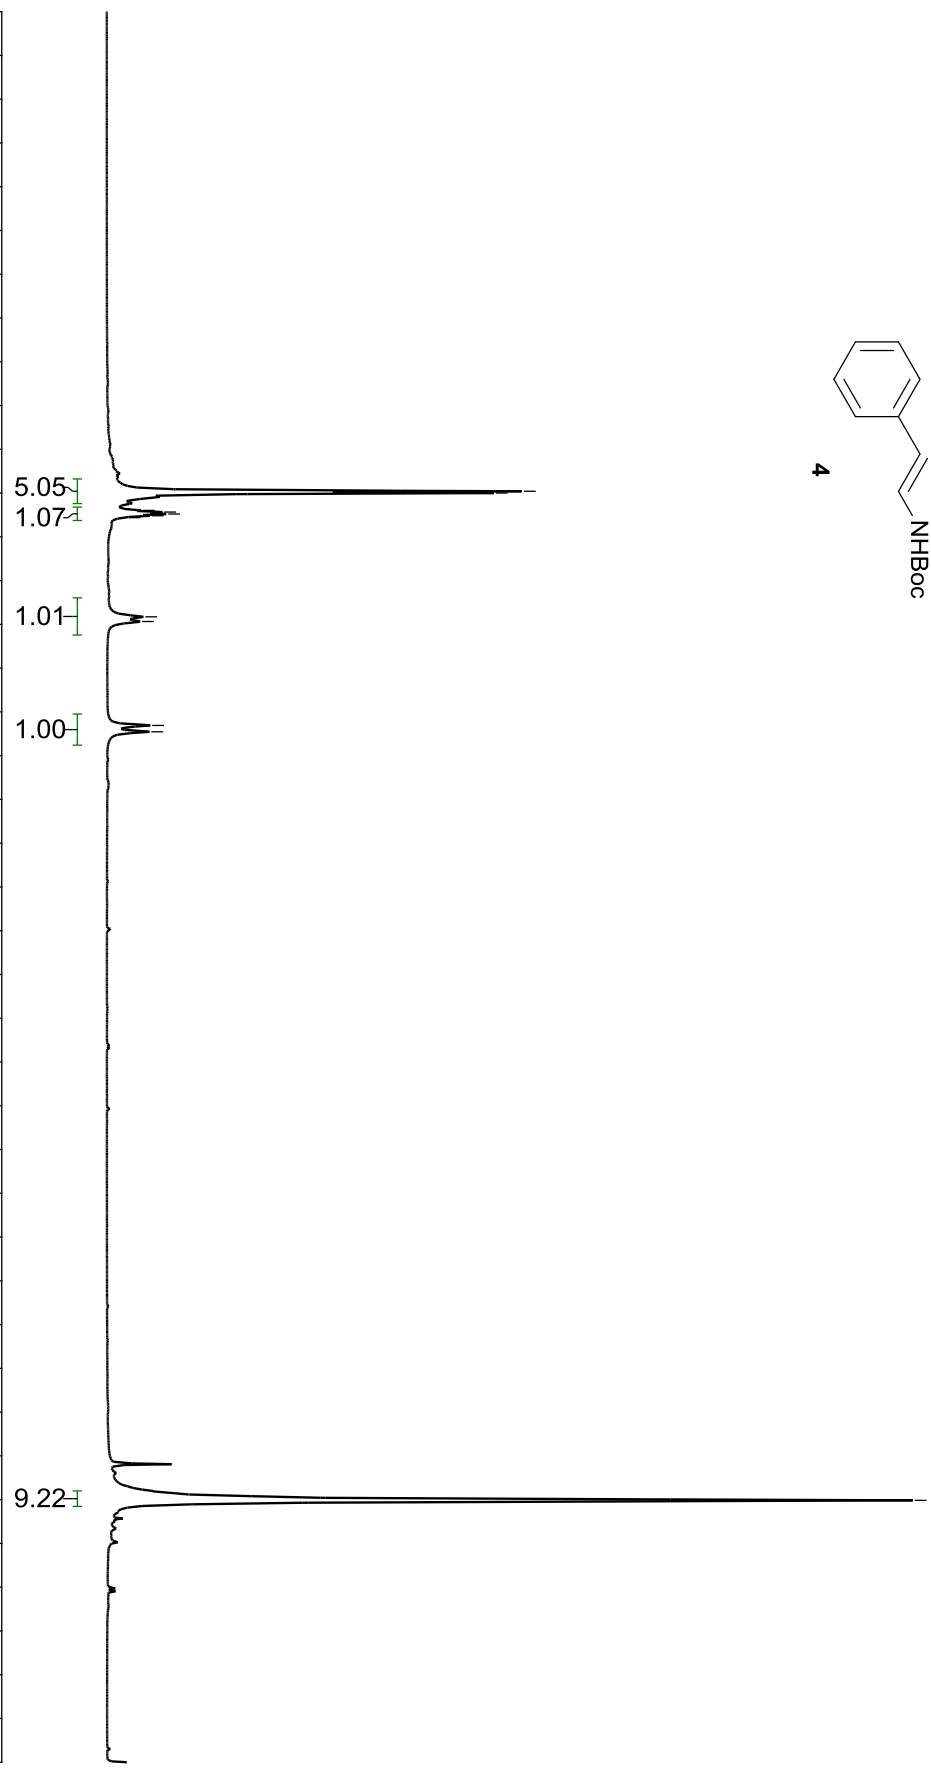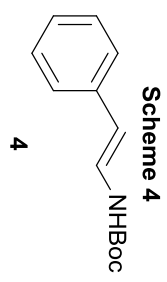

7.260  
7.250  
7.151  
7.142  
7.130  
7.120  
7.110  
6.543  
6.516  
5.923  
5.886

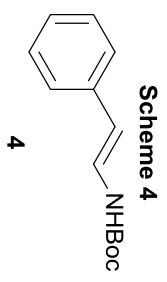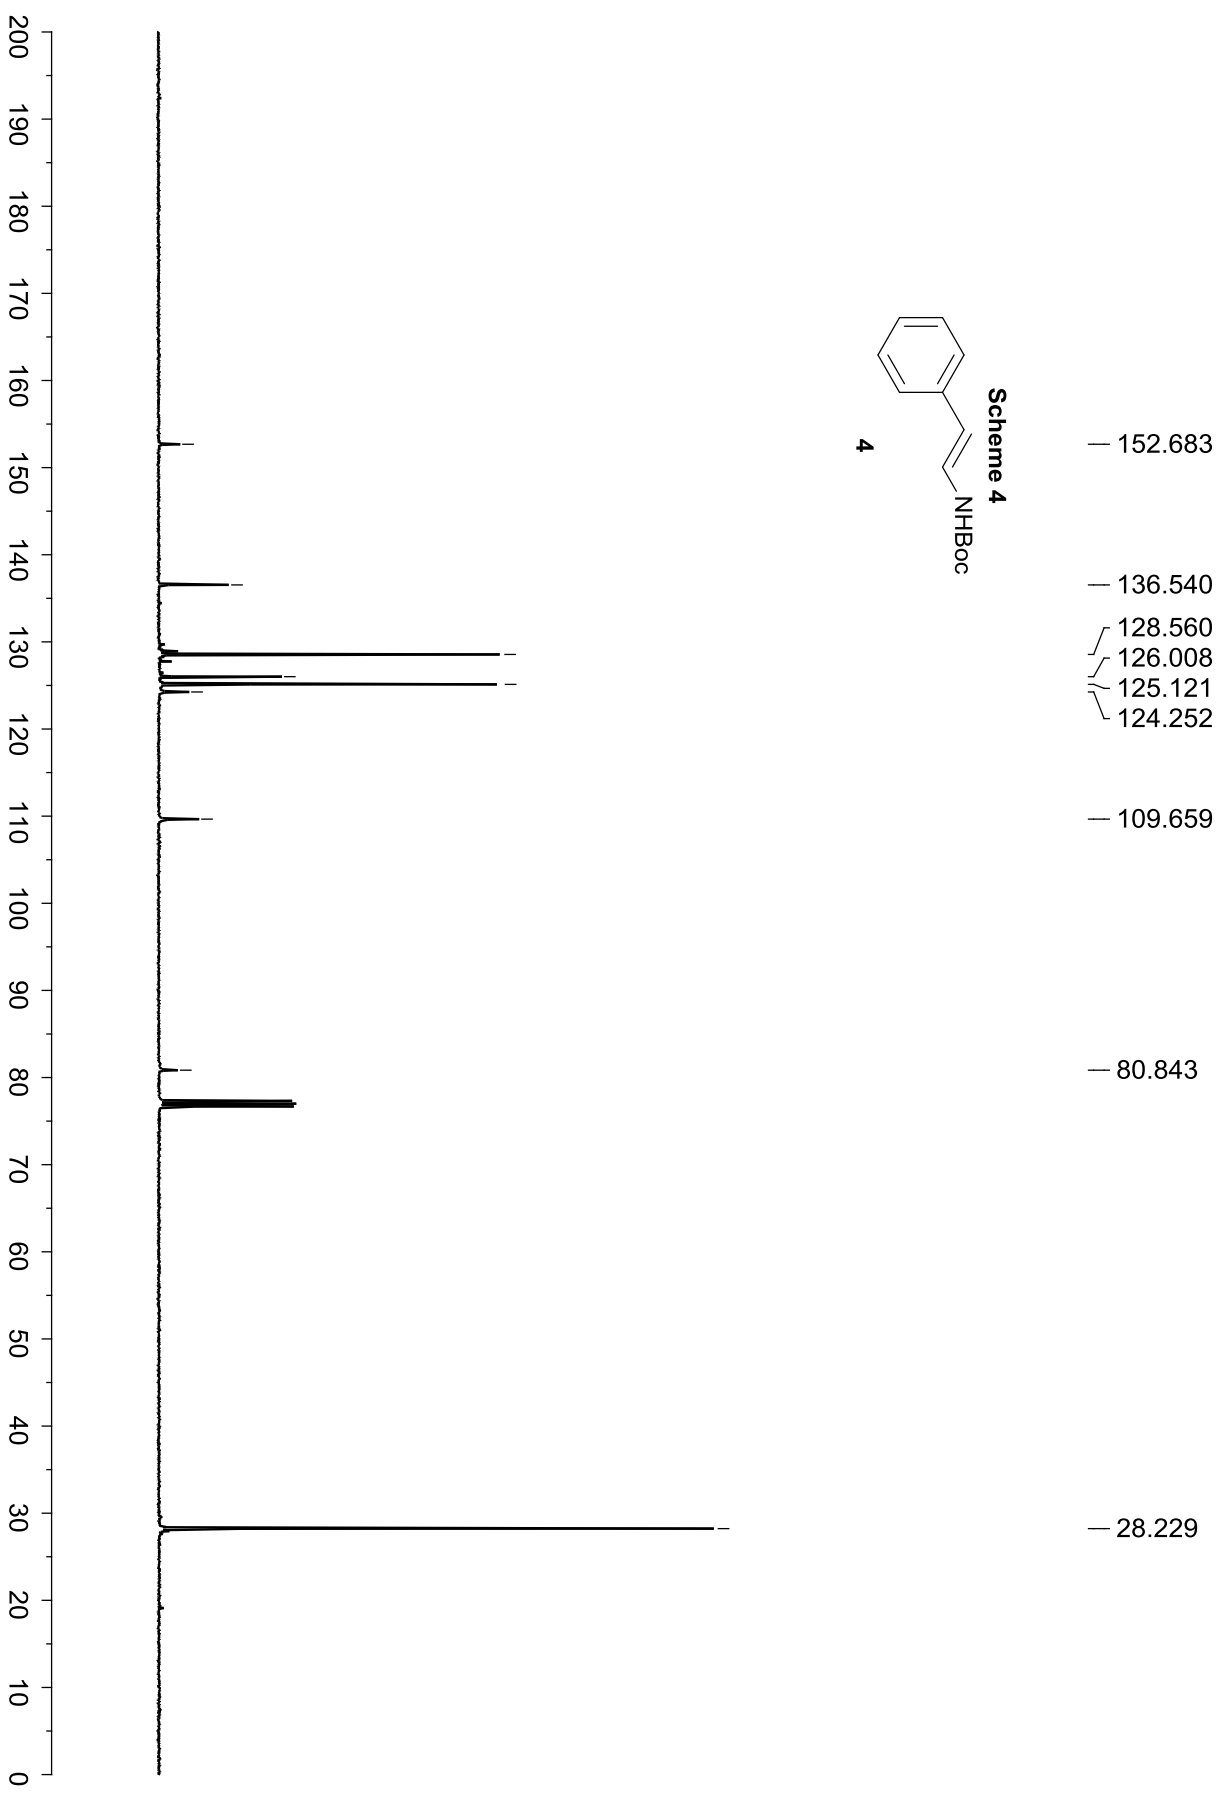

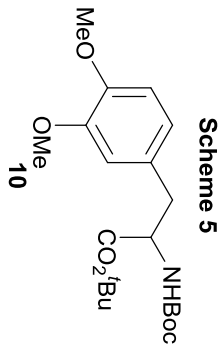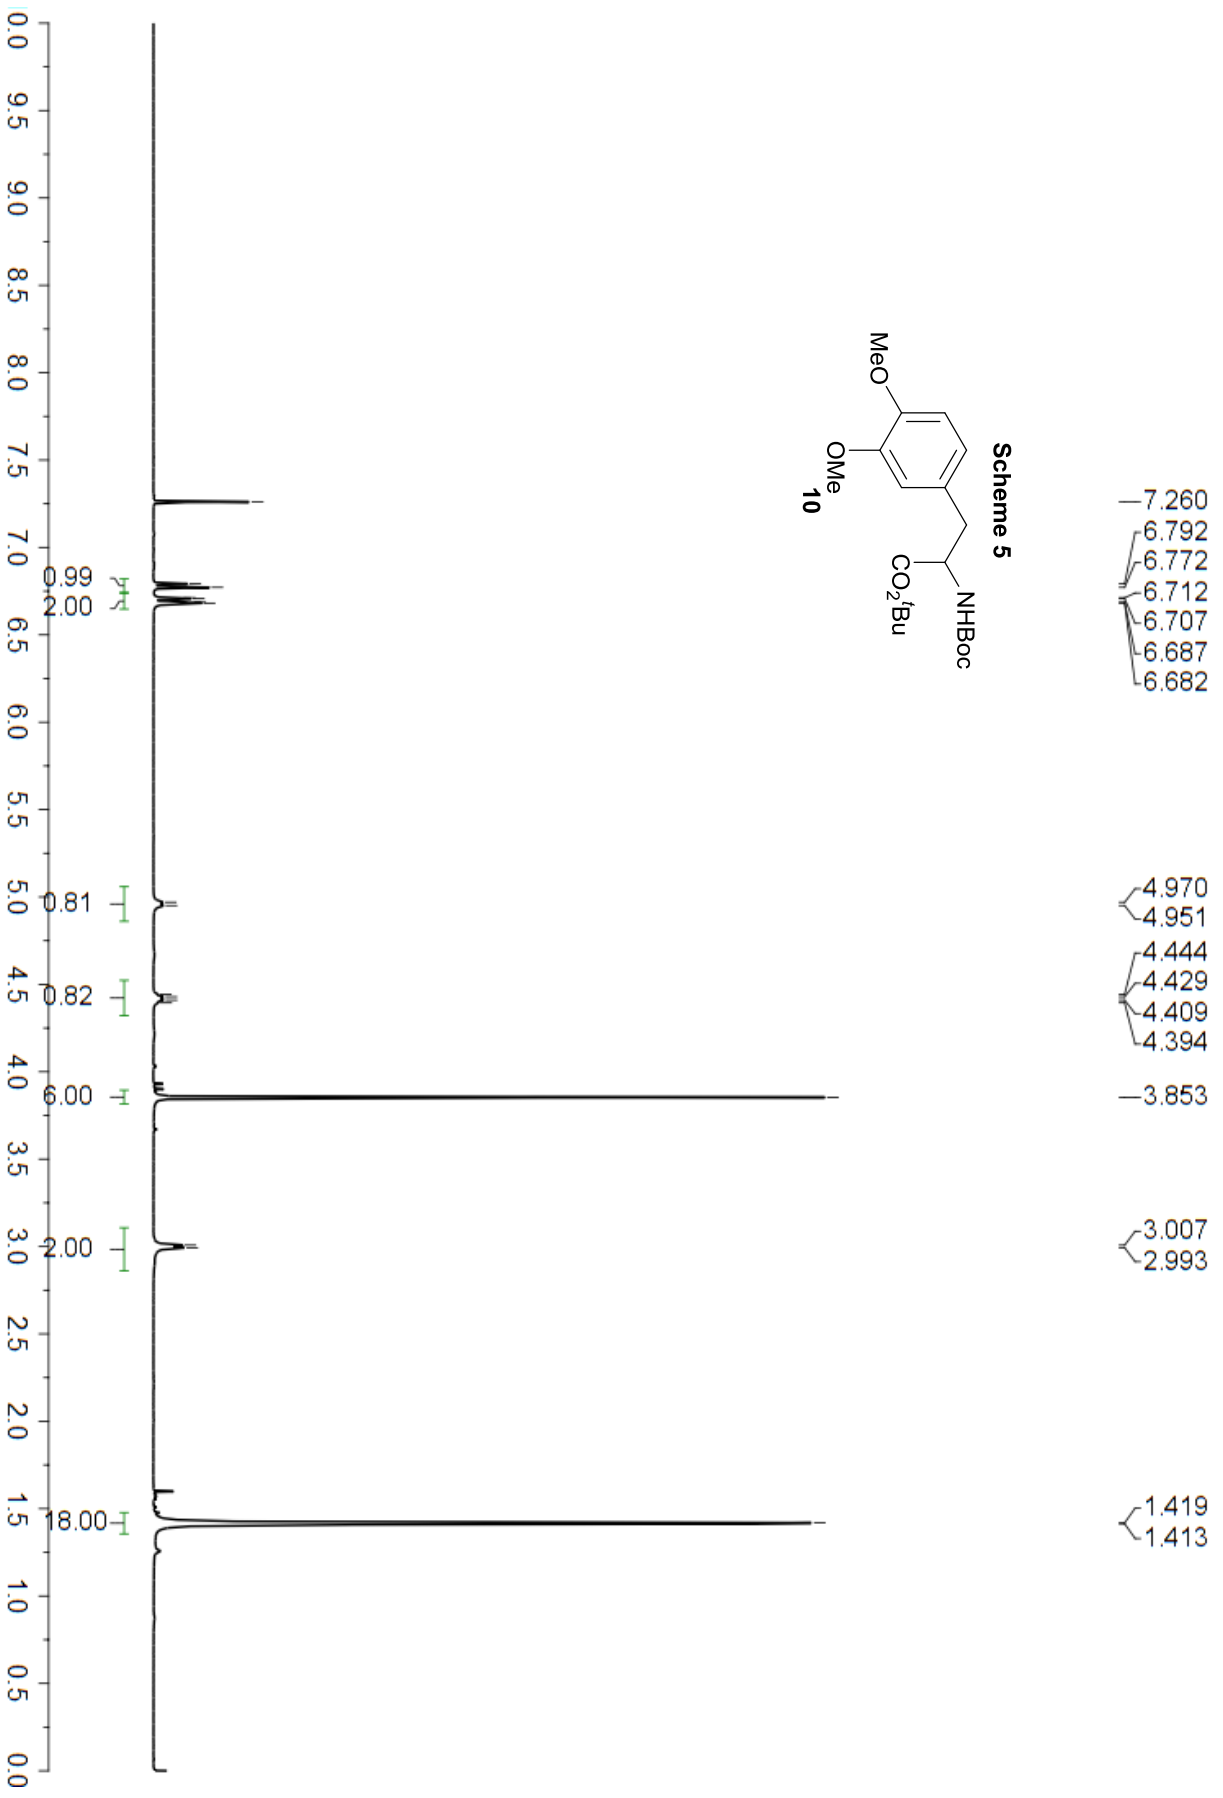



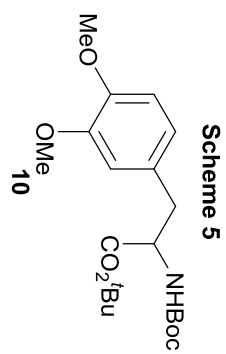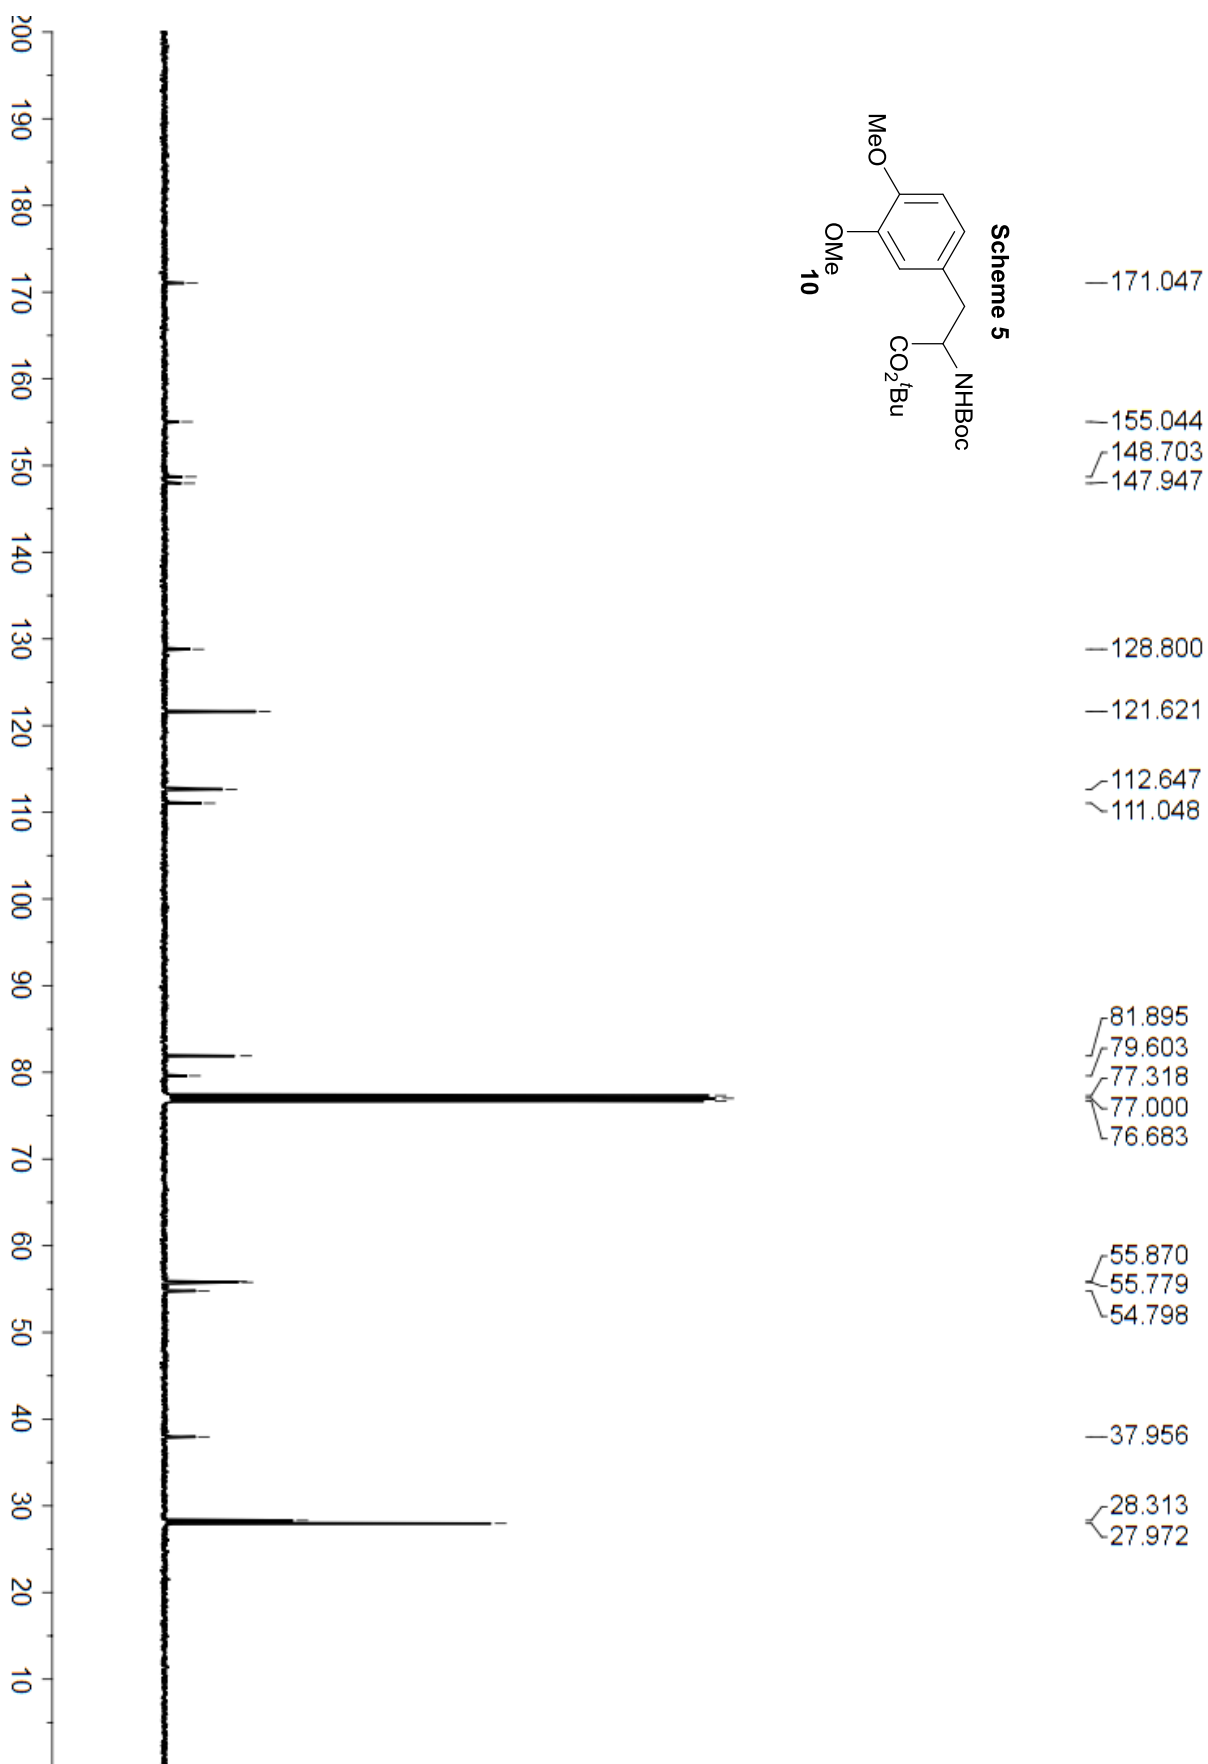

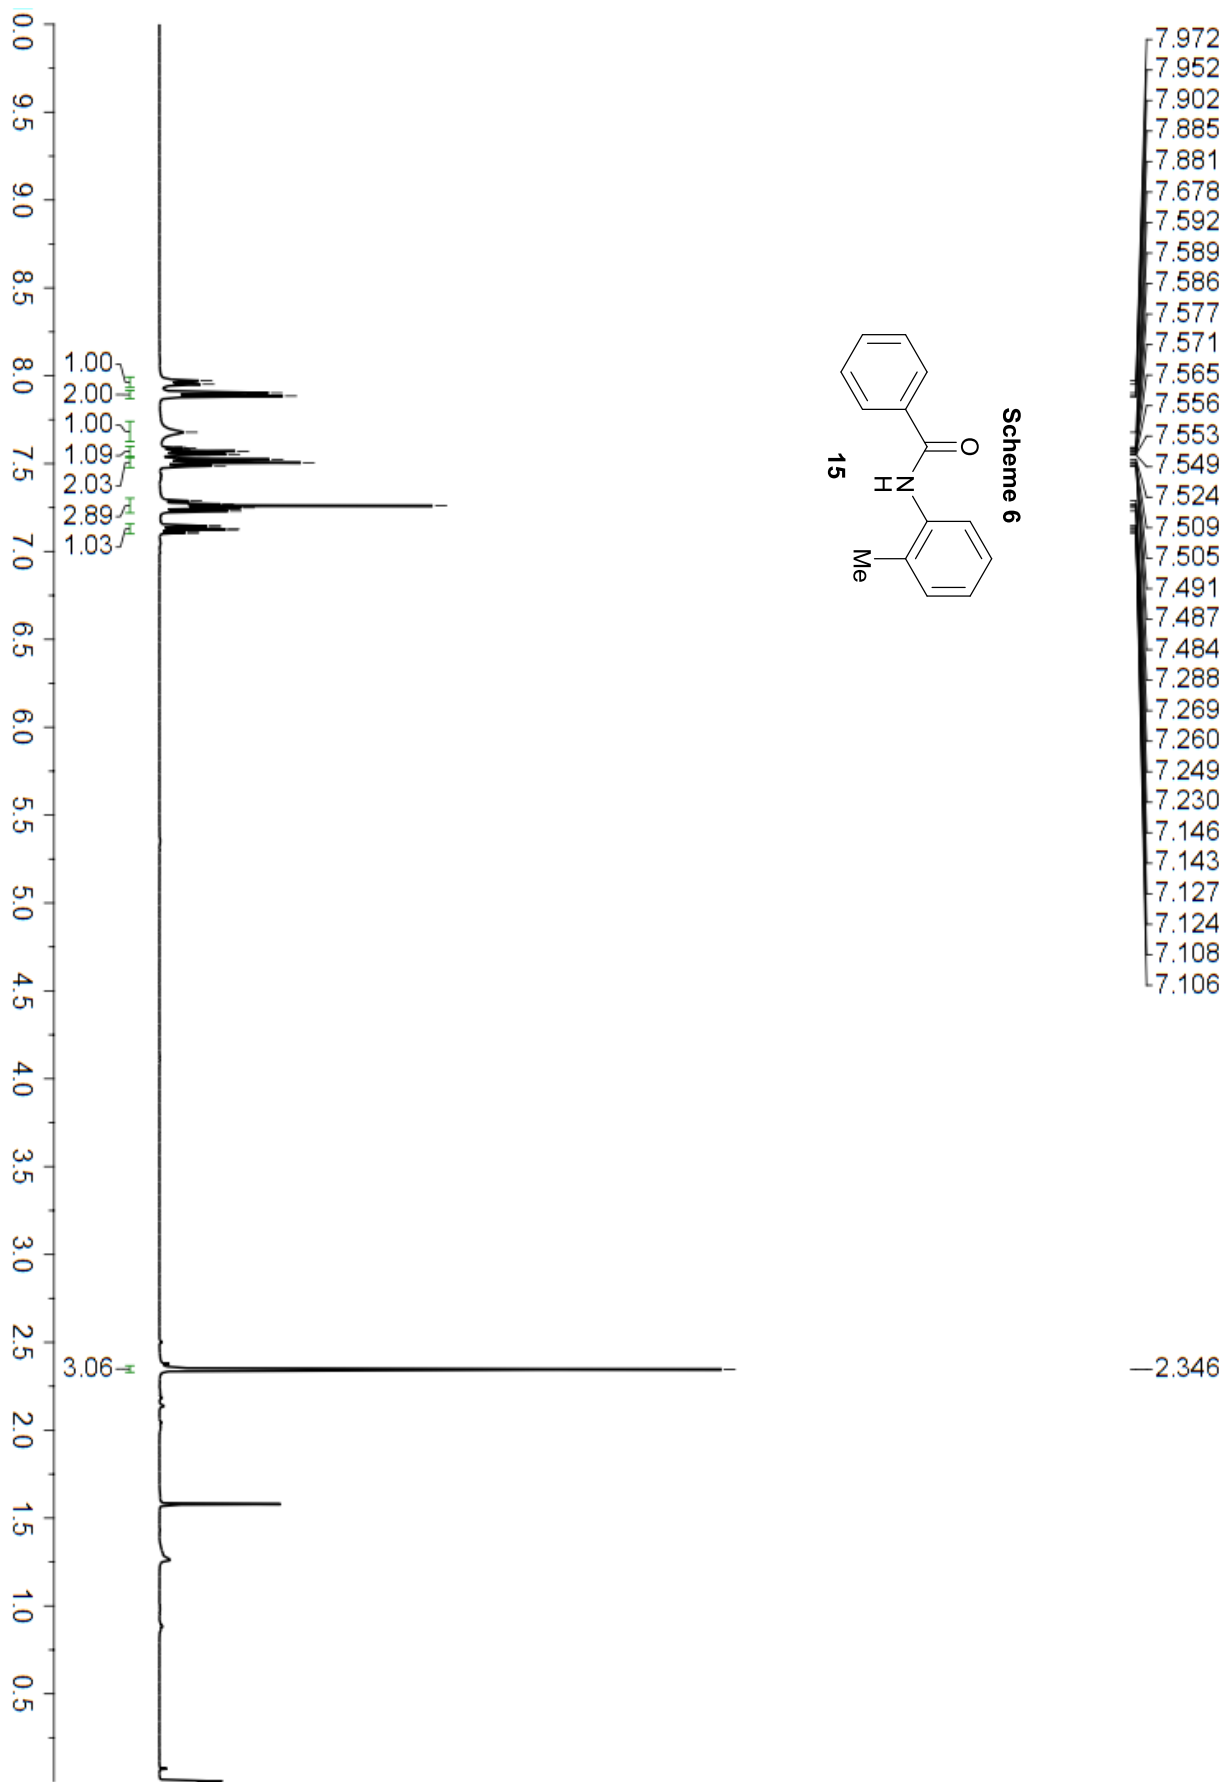

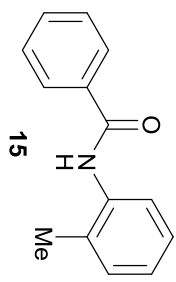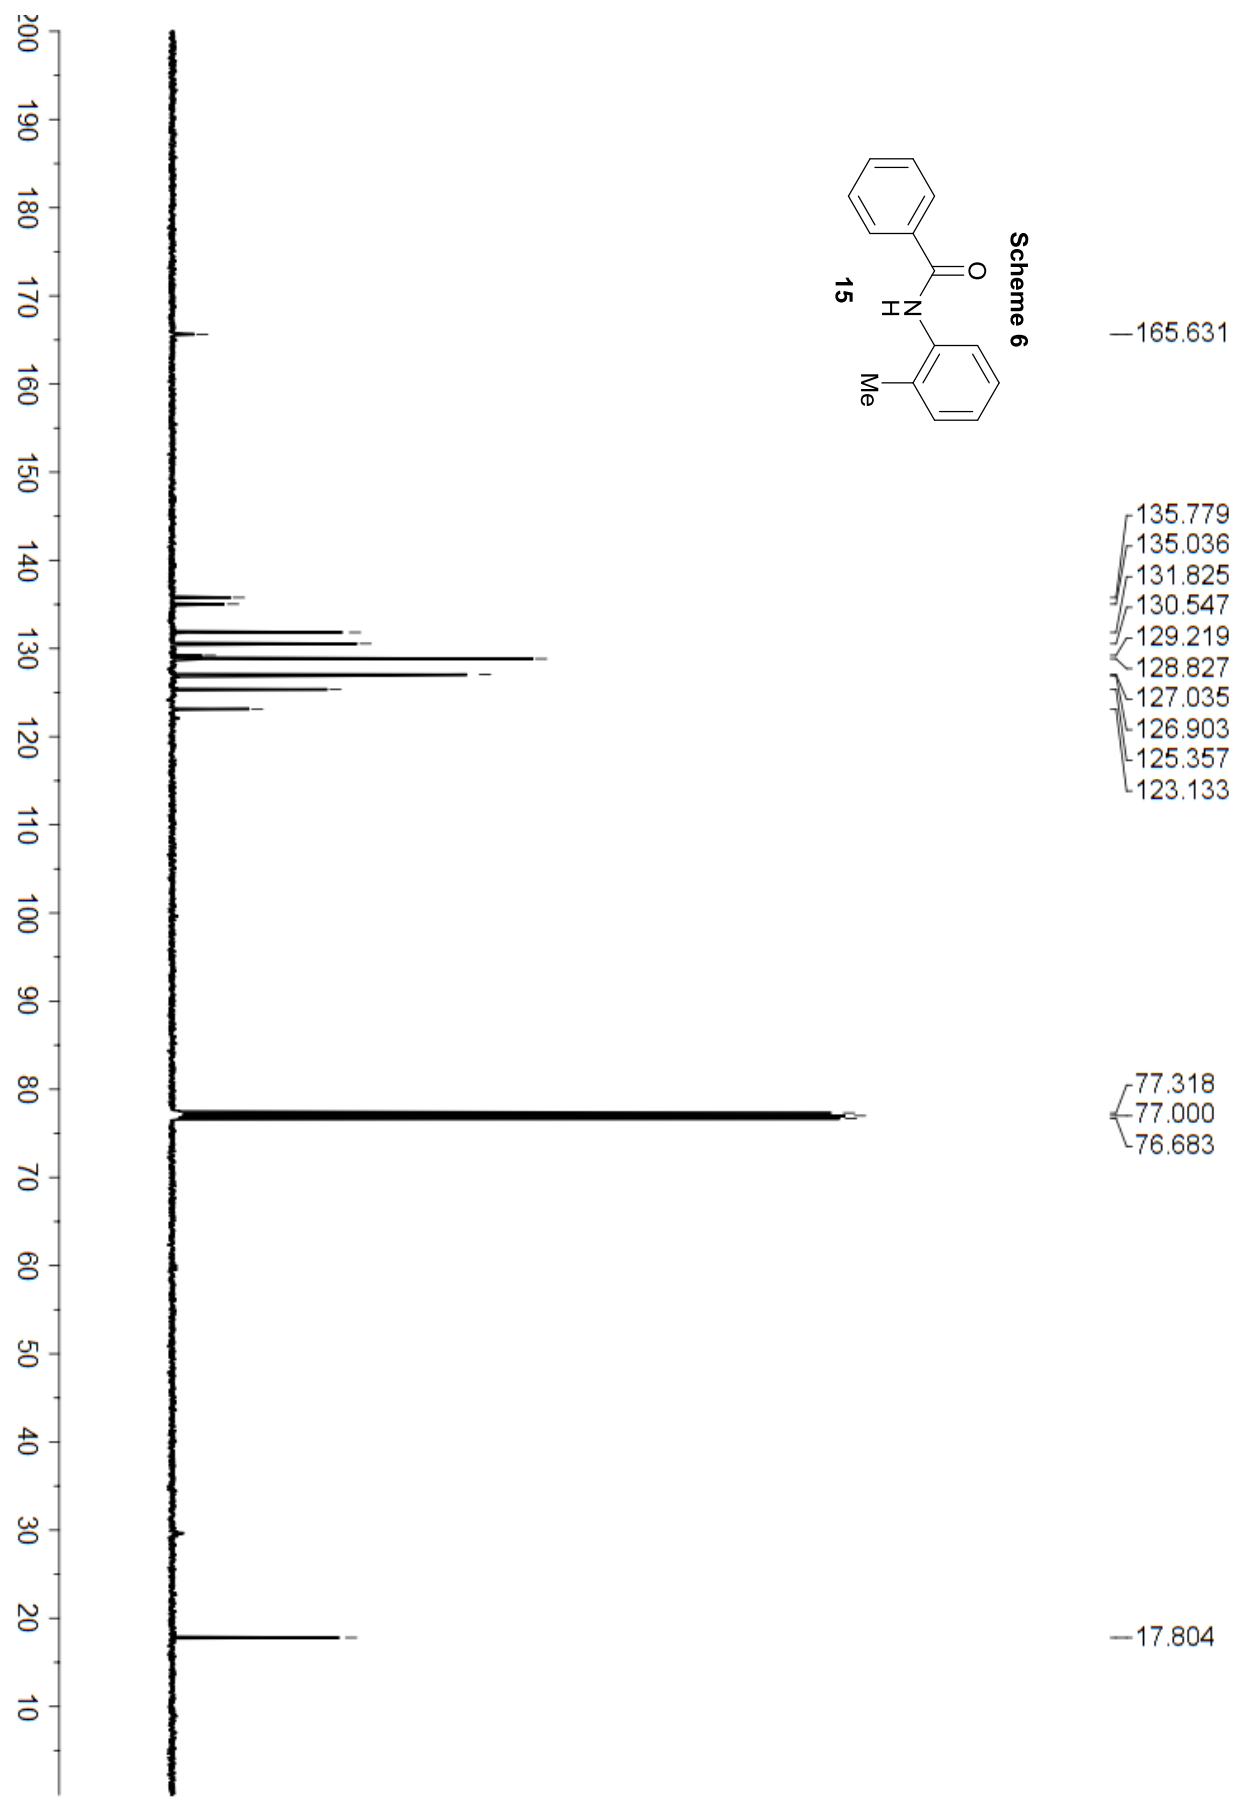

Supplement: d0ob00677g1.pdf [file d0ob00677g1.pdf]
